# Supplementary material for: Bioinformatic analysis and experimental validation of hub autophagy-related genes as novel biomarkers for type 2 diabetes mellitus and Alzheimer’s disease
Source: PeerJ journal article supplement (doi:10.7717/peerj.20143), 2025-10-06
Supplement: Raw_data.zip [file Animal Experiment Raw Data.xlsx]

## Sheet: Sheet1
Group	ID	weight	FBG	Morris water maze
db/m				Escape latency -day1	Escape latency -day2	Escape latency -day3	Escape latency -day4	Escape latency -day5	Swimming speed-day1	Swimming speed-day2	Swimming speed-day3	Swimming speed-day4	Swimming speed-day5	Percent time spent in target quadrant	Number of times across the platform
1	42	30.2	3.8	55.52	34.39	25.52	21.41	15.63	17.5182	18.6059	16.34	20.23	22.0992	42.84	7
1	49	29.4	3.8	47.31	35.53	20.16	31.55	27.48	18.7542	19.0677	17.06	20.1389	15.2194	54.28	5
1	41	31.4	4.9	45.71	35.97	22.13	27.68	25.95	19.0194	16.9983	16.83	21.81	19.7627	34.33	8
1	43	29.8	4.1	46.89	39.76	17.23	26.09	33.61	17.5182	18.6059	20.98	18.3642	19.7471	46.96	5
1	53	29.6	3.8	54.44	50.01	28.23	22.61	18.37	18.7542	19.0677	17.34	16.2278	23.3262	34.83	6
1	50	30	4.1	58.33	23.63	44.75	27.41	17.03	19.0194	16.9983	18.06	20.1389	22.0992	38.04	4
1	46	31.5	3.8	57.99	49.36	27.44	19.89	13.17	12.8079	15.5942	16.83	16.8089	15.2194	47.32	4
1	44	27.9	4	59.76	25.48	37.43	22.27	32.43	19.0194	16.4221	15.98	18.3642	19.7627	52.44	7
db/db
2	4	46.2	20.3	60	60	53.37	48.09	58.76	15	19.1005	15.46	21.426	17.0289	22.28	1
2	18	53.6	23.4	60	45.69	57.99	52.19	57.34	11.45	16.3086	18.29	16.7143	19.9209	24.21	2
2	10	57.9	21.1	60	45.93	60	60	53.97	15.6	17.7144	16.5	23.0419	21.0494	25.42	3
2	33	50.3	18.3	60	57.88	60	60	43.4	19.95	20.9582	16.26	23.046	23.5828	20.08	4
2	17	55.8	18.6	60	56.97	48.76	54.45	60	20.2	20.6642	19.69	22.3154	19.8086	14.16	3
2	27	55.4	19.4	60	60	60	47.23	60	15	19.1005	19.46	21.426	17.0289	18.44	2
2	35	60.2	18.5	60	60	60	53.49	60	11.45	16.3086	18.29	16.7143	19.9209	19.82	4
2	37	46.9	23.1	60	60	55.92	60	60	15.6	17.7144	16.5	23.0419	21.0494	25.26	5
