# Supplementary material for: Bioinformatic analysis and experimental validation of hub autophagy-related genes as novel biomarkers for type 2 diabetes mellitus and Alzheimer’s disease
Source: PeerJ journal article supplement (doi:10.7717/peerj.20143), 2025-10-06
Supplement: Raw_data.zip [file PCR raw data.xlsx]

## Sheet: Sheet1
	PCR results：2-△△CT
ID	ANXA5	BAG3	MET	PFKFB3	CDKN1A
db/m-42	1	1	1	1	1
db/m-49	0.917893	1.37488	0.322813	1.40126	0.594487
db/m-41	1.05077	0.650256	0.611748	0.976341	0.454938
db/m-43	1.47582	0.884156	0.528079	0.675699	0.363486
db/m-53	1.75037	3.07068	0.370416	0.908992	0.534278
db/db-4	2.19244	3.29494	0.062578	1.08914	0.636152
db/db-10	1.48588	1.49184	0.208796	1.21439	0.835004
db/db-17	1.76469	4.73077	0.326422	1.58868	0.813255
db/db-33	2.35428	3.0318	0.328654	1.0981	0.675074
db/db-18	2.57045	2.83029	0.261544	1.37784	0.906169
