# Supplementary material for: Bioinformatic analysis and experimental validation of hub autophagy-related genes as novel biomarkers for type 2 diabetes mellitus and Alzheimer’s disease
Source: PeerJ. 2025 Oct 6;13:e20143. doi: 10.7717/peerj.20143 (PMC12510248; doi:10.7717/peerj.20143)
Supplement: Supplemental Information 3 [file peerj-13-20143-s003.xlsx]

## Sheet: sum
id
AMBRA1
APOL1
ARNT
ARSA
ARSB
ATF4
ATF6
ATG10
ATG12
ATG16L1
ATG16L2
ATG2A
ATG2B
ATG3
ATG4A
ATG4B
ATG4C
ATG4D
ATG5
ATG7
ATG9A
ATG9B
ATIC
BAG1
BAG3
BAK1
BAX
BCL2
BCL2L1
BECN1
BID
BIRC5
BIRC6
BNIP1
BNIP3
BNIP3L
C12orf44
C17orf88
CALCOCO2
CAMKK2
CANX
CAPN1
CAPN10
CAPN2
CAPNS1
CASP1
CASP3
CASP4
CASP8
CCL2
CCR2
CD46
CDKN1A
CDKN1B
CDKN2A
CFLAR
CHMP2B
CHMP4B
CLN3
CTSB
CTSD
CTSL1
CX3CL1
CXCR4
DAPK1
DAPK2
DDIT3
DIRAS3
DLC1
DNAJB1
DNAJB9
DRAM1
EDEM1
EEF2
EEF2K
EGFR
EIF2AK2
EIF2AK3
EIF2S1
EIF4EBP1
EIF4G1
ERBB2
ERN1
ERO1L
FADD
FAM48A
FAS
FKBP1A
FKBP1B
FOS
FOXO1
FOXO3
GAA
GABARAP
GABARAPL1
GABARAPL2
GAPDH
GNAI3
GNB2L1
GOPC
GRID1
GRID2
HDAC1
HDAC6
HGS
HIF1A
HSP90AB1
HSPA5
HSPA8
HSPB8
IFNG
IKBKB
IKBKE
IL24
IRGM
ITGA3
ITGA6
ITGB1
ITGB4
ITPR1
KIAA0226
KIAA0652
KIAA0831
KIF5B
KLHL24
LAMP1
LAMP2
MAP1LC3A
MAP1LC3B
MAP1LC3C
MAP2K7
MAPK1
MAPK3
MAPK8
MAPK8IP1
MAPK9
MBTPS2
MLST8
MTMR14
MTOR
MYC
NAF1
NAMPT
NBR1
NCKAP1
NFE2L2
NFKB1
NKX2-3
NLRC4
NPC1
NRG1
NRG2
NRG3
P4HB
PARK2
PARP1
PEA15
PELP1
PEX14
PEX3
PIK3C3
PIK3R4
PINK1
PPP1R15A
PRKAB1
PRKAR1A
PRKCD
PRKCQ
PTEN
PTK6
RAB11A
RAB1A
RAB24
RAB33B
RAB5A
RAB7A
RAC1
RAF1
RB1
RB1CC1
RELA
RGS19
RHEB
RPS6KB1
RPTOR
SAR1A
SERPINA1
SESN2
SH3GLB1
SIRT1
SIRT2
SPHK1
SPNS1
SQSTM1
ST13
STK11
TBK1
TM9SF1
TMEM49
TMEM74
TNFSF10
TP53
TP53INP2
TP63
TP73
TSC1
TSC2
TUSC1
ULK1
ULK2
ULK3
USP10
UVRAG
VAMP3
VAMP7
VEGFA
WDFY3
WDR45
WDR45L
WIPI1
WIPI2
ZFYVE1
ABCB6
ABL1
ABL2
ABR
ACAP2
ACAP3
ACBD5
ACTA1
ACTA2
ACTB
ACTC1
ACTG1
ACTG2
ACTR2
ACTR3
ACTR3B
AES
AFG3L2
AGFG1
AKT1
AKT1S1
AKT2
AKT3
ALK
ALPI
ALPL
ALPP
ALPPL2
ANK1
ANK2
ANK3
ANKK1
ANKRD28
ANKRD44
AP1AR
AP1B1
AP1G1
AP1G2
AP1M1
AP1M2
AP1S1
AP1S2
AP1S3
AP2A1
AP2A2
AP2B1
AP2M1
AP2S1
AP3D1
AP3M1
AP3M2
AP4B1
AP4E1
AP4M1
APAF1
ARAF
ARF6
ARFGEF1
ARFGEF2
ARHGAP10
ARHGAP26
ARHGAP42
ARHGEF17
ARHGEF4
ARHGEF9
ARL2
ARNT2
ARNTL
ARNTL2
ATG101
ATG13
ATG14
ATM
ATR
AURKA
AXL
BCR
BDNF
BECN2
BLK
BRAF
BRSK1
BRSK2
CAMK1
CAMK1D
CAMK1G
CAMK2B
CAMK2D
CAMK2G
CAMKK1
CAPN11
CAPN12
CAPN13
CAPN14
CAPN3
CAPN5
CAPN6
CAPN7
CAPN8
CAPN9
CAPNS2
CDK1
CDK11A
CDK13
CDK16
CDK17
CDK18
CDK2
CDK5
CDKL1
CDKL4
CDKL5
CELF1
CELF3
CELF5
CHUK
CLEC16A
CLOCK
CLTA
CLTB
CLTC
CSNK1A1L
CSNK1D
CSNK1G2
CSNK2A1
CSNK2A2
CSNK2B
CTSE
CTSL
CTSV
DAPK3
DAW1
DDIT4
DEPTOR
DES
DNM1
DNM1L
DNM2
DNM3
DNPEP
DRAM2
E2F1
E2F2
EEF1A1
EEF1A2
EI24
EIF2AK1
EIF2AK4
EIF4E
EIF4E1B
EIF4EBP2
EIF4EBP3
EPAS1
EPG5
EPHA2
EPHA3
EPHA4
EPHA5
EPHB1
EPHB2
EPHB3
EPN1
EPN2
EPN3
ERBB3
ERBB4
ERN2
EVA1A
EXOC1
EXOC2
EXOC3
EXOC3L1
EXOC3L4
EXOC4
EXOC5
EXOC6
EXOC6B
EXOC7
EXOC8
FBXW7
FGFR1
FGFR2
FGFR3
FGR
FIS1
FKBP8
FUNDC1
GABARAPL3
GAPDHS
GBF1
GFAP
GLIPR2
GRAMD1B
GRB2
HARBI1
HCK
HDAC4
HDAC5
HDAC7
HIF3A
HRAS
HSPA1A
HSPA1B
HSPA1L
HSPA2
HSPA6
HUNK
IARS
IGF1R
INS
INSR
INSRR
IRS1
IRS2
IRS4
ITPR2
ITPR3
JUN
KAT5
KAT6A
KAT6B
KAT7
KAT8
KEAP1
KIAA0226L
KLHL1
KLHL12
KLHL13
KLHL17
KLHL18
KLHL2
KLHL20
KLHL28
KLHL4
KLHL5
KLHL8
KPNA6
KRAS
KRT5
KRT6A
KRT6B
KRT6C
KRT71
KRT72
KRT73
KRT74
KRT75
KRT76
KRT79
KRT8
KRT81
KRT82
KRT83
KRT84
KRT85
KSR1
LATS2
LCK
LPIN1
LPIN2
LRBA
LRSAM1
LYST
MAN2A2
MAN2B1
MAN2C1
MAP2K1
MAP2K2
MAP2K3
MAP2K4
MAP2K5
MAP3K14
MAP3K6
MAP4K1
MAP4K2
MAP4K3
MAP4K5
MAPK10
MAPK14
MAPK15
MAPK7
MAPKAP1
MARK1
MARK2
MARK3
MARK4
Mb3875
MELK
MERTK
MFN1
MFN2
MINK1
MITF
MTM1
MTMR1
MTMR2
MTMR4
MTMR6
MTMR7
MTMR8
MTMR9
MTRF1L
MX1
MX2
MYD88
MYLK
MYLK3
MYO3A
NAPSA
NBEA
NCOA4
NFE2L1
NFE2L3
NFKB2
NFKBIA
NFKBIB
NFKBID
NFKBIE
NFKBIZ
NLRC3
NLRC5
NLRP1
NLRP12
NLRP13
NLRP14
NLRP3
NLRP4
NLRP5
NLRP7
NLRP8
NLRP9
NOD1
NOD2
NPAS2
NPAS3
NRAS
NRBF2
NTRK2
NUAK1
NUAK2
NVL
OPA1
OPHN1
PA2G4
PAK1
PAK2
PAK3
PAK4
PAK6
PAK7
PDK1
PDPK1
PEX1
PEX5
PEX5L
PGA3
PGA4
PGA5
PGAM5
PI4KB
PIK3C2A
PIK3C2B
PIK3CA
PIK3CB
PIK3CD
PIK3CG
PIP4K2A
PIP5K1A
PIP5K1B
PIP5K1C
PKN1
PKN2
PKN3
PLCB4
PLCD1
PLCG1
PLCH1
PLCH2
PLD1
PLD2
PNCK
POC1A
POC1B
PPP1CA
PPP1CC
PPP2CA
PPP2CB
PPP2R1A
PPP2R1B
PPP2R2A
PPP2R2B
PPP2R2C
PPP2R2D
PPP2R3A
PPP2R3B
PPP2R3C
PPP2R4
PPP2R5A
PPP2R5B
PPP2R5C
PPP2R5D
PPP2R5E
PPP4C
PPP6C
PREX1
PREX2
PRKAA1
PRKAA2
PRKAB2
PRKACA
PRKACB
PRKCA
PRKCB
PRKCE
PRKCG
PRKCH
PRKCI
PRKCZ
PRKDC
PRMT1
PRMT3
PRMT8
PRR5
PRR5L
RAB10
RAB12
RAB1B
RAB5B
RAB5C
RAB8A
RAB9A
RABGEF1
RALA
RALB
RALGAPA1
RALGAPA2
RCAN1
REL
RELB
RET
RGL1
RICTOR
RIPK1
RIPK4
RPS6KA1
RPS6KA3
RPS6KA4
RPS6KA6
RPS6KB2
RRAGA
RRAGB
RRAGC
RRAGD
RUBCN
RUNX1
RUNX3
RYR1
RYR2
SAR1B
SBF2
SCOC
SEC16A
SEC16B
SEC23A
SEC23B
SEC24B
SEC24C
SEC24D
SESN1
SESN3
SGK2
SH3GL1
SH3GL2
SH3GL3
SH3GLB2
SHC1
SHC2
SHC3
SHC4
SIDT1
SIDT2
SIK1
SIK2
SIK3
SIM2
SIN3A
SIN3B
SIPA1L3
SLC1A1
SLC1A2
SLC1A4
SLC1A5
SLC1A6
SLC1A7
SLC36A1
SLC36A4
SLC3A1
SLC3A2
SLC7A10
SLC7A11
SLC7A5
SLC7A6
SLC7A7
SLC7A8
SLC7A9
SMPD1
SMPDL3B
SNAP29
SNRK
SNRNP40
SNX1
SNX30
SNX4
SOD1
SOD2
SOS1
SOS2
SPATA13
SPATA5
SPATA5L1
SPG7
SRC
STK24
STK25
STK26
STK36
STK38L
STK4
STX17
STX7
STX8
STXBP1
STXBP2
STXBP3
SUPT20H
TBC1D12
TBC1D14
TBC1D25
TBC1D4
TBC1D5
TBC1D7
TECPR1
TELO2
TEP1
TFE3
TFEB
TGFBRAP1
TIGAR
TM9SF2
TM9SF3
TM9SF4
TMEM173
TNFAIP2
TNIK
TNS1
TNS2
TNS3
TOMM7
TOR1B
TPR
TPTE2
TRADD
TRAF1
TRAF2
TRAF3
TRAF4
TRAF5
TRAF6
TRAPPC1
TRAPPC10
TRAPPC2
TRAPPC3
TRAPPC4
TRAPPC5
TRAPPC6A
TRAPPC6B
TRAPPC8
TRAPPC9
TRRAP
UBB
UBC
UBE2A
UBE2D2
UBE2D3
UBE2H
UBE2J2
UBE2L3
UBE2N
UGT1A1
UGT1A10
UGT1A6
UGT1A9
UGT2A1
UGT2A3
UGT2B10
UGT2B15
UGT2B17
UGT2B28
UGT2B4
UGT2B7
VAMP8
VCP
VDAC1
VDAC2
VDAC3
VIM
VMP1
VPS13A
VPS13C
VPS16
VPS18
VPS33A
VPS33B
VPS39
VPS41
VPS45
VTI1B
WAC
WDFY4
WDR3
WDR45B
WDR5
WDR5B
YES1
YME1L1
ABHD5
AMFR
ANXA7
APOL6
APP
ATG9
BAD
BAIAP2
BBC3
BCL2L11
BIRC2
BOK
BST2
C19orf12
C9orf72
CAMP
CAT
CATSPER4
CCND1
CDKN2D
CHEK1
CHMP2A
CHMP3
CHMP4A
CHMP4C
CHMP6
CHRND
CISD1
CISD2
COPZ1
COX5A
CTNNB1
CXCL12
CXCR3
CYB5A
DAP
DAP3
DCN
DICER1
DNAJA3
EIF4G2
ENG
EP300
EPM2A
FBXL2
FBXL20
FBXO7
FLCN
FN1
GAB1
GABBR2
GHRL
GJA4
GNRH2
GOLGA2
GPR18
GPR182
GPR37
GSK3B
GTF2IRD2
GTF2IRD2B
HIVEP2
HMGB1
HSF1
HSP90AA1
HSPG2
HTR2B
HTT
ICMT
IKBKG
IL6
KDM4A
KDR
KIAA1524
KIF25
KIF5C
KRT18
LACRT
LAMP3
LAPTM4B
LARP1
LEP
LEPR
LETM1
PRODH
LRRK2
LZTS1
MAP1S
MAPT
MCL1
MCOLN1
MCOLN3
MDM2
MEFV
MEGF10
MET
MID2
MMP10
MTDH
MTMR3
MVB12A
MYL3
NACC1
NCR3
NDRG1
NEU3
NOS1
NOS2
NOS3
NRBP2
NUPR1
OCRL
OPTN
PAFAH1B2
PCGF1
PDK2
PDK4
PIK3R2
PIP4K2B
PIP4K2C
PKM
PLEKHF1
PLG
PLK2
PPFIA4
PRKD1
PSAP
PTGER2
PTPN22
QSOX1
RAC3
RASIP1
RNASEL
RNF152
S100A8
S100A9
S1PR3
SDHB
SGSM2
SH3BP4
SIRT6
SMAD2
SMAD4
SMYD3
SNAI1
SNCA
SNF8
SNRPE
SORCS2
STAM
STAM2
STIM1
STK38
SUPT5H
SVIP
TAB2
TAB3
TACR2
TBC1D10A
TBC1D10B
TBC1D10C
TBC1D16
TBC1D17
TBC1D9
TBC1D9B
TCHP
TGFB1
THBS2
TMEM59
TNF
TNFRSF10B
TP53INP1
TPCN1
TPCN2
TRIM13
TRIM17
TRIM21
TRIM22
TRIM5
TRIM65
TRIM8
TSG101
TUFM
UBASH3B
UBQLN1
USP13
USP19
USP30
USP33
VPS25
VPS28
VPS36
VPS37A
VPS37B
VPS37C
VPS37D
VPS51
VTI1A
WDR24
WDR6
XBP1
XPO1
YWHAQ
ZC3H12A
ZKSCAN3
ADRA1A
BMF
CPTP
CTSA
DAPL1
FEZ1
FEZ2
FOXK1
FOXK2
GATA4
HERC1
HGF
HMOX1
IL10
IL10RA
KLHL22
MIR199A1
MIRLET7B
MT3
PHF23
POLDIP2
RNF41
RNF5
SCFD1
SEC22B
SMCR8
SMG1
SNRNP70
STAT3
TLK2
TMEM39A
TMEM39B
TREM2
TSPO
UBQLN4
USP36
WASHC1
CDC37
HTRA2
HUWE1
PHB2
PRKN
VPS13D
ATP13A2
CLU
PLK3
STUB1
SYNPO2
ADRB2
AUP1
SPTLC1
SPTLC2
CEBPB
COL10A1
COL1A1
COL3A1
CREG1
CXCL1
CXCL14
CXCL8
GSN
HMGA1
IFI16
IFNB1
IGF1
IGFBP3
IGFBP5
IGFBP7
IL1A
IL1B
IL3
IL6R
IL6ST
ING1
ING2
INHBA
IRF1
IRF5
IRF7
KMT2A
MIR29B2
MIR29C
MIR3606
MMP14
PCNA
PLAT
PLAU
RSL1D1
SERPINB2
SERPINE1
SLC39A1
SLC39A2
SLC39A3
SLC39A4
SMAD3
SPARC
THBS1
TNFSF15
VTN
ARL13B
CETN1
CFTR
CHMP7
DYNC1H1
DYNC1I1
DYNC1I2
DYNC1LI1
DYNC1LI2
DYNLL1
DYNLL2
HBB
IFT88
LAMTOR1
LAMTOR2
LAMTOR3
LAMTOR4
LAMTOR5
MTERF3
MVB12B
PARK7
PCNT
PLIN2
PLIN3
PRKAG1
PRKAG2
PRKAG3
RNASE1
RPS27A
SLC38A9
TOMM20
TOMM22
TOMM40
TOMM5
TOMM6
TOMM70
TUBA1A
TUBA1B
TUBA1C
TUBA3C
TUBA3D
TUBA3E
TUBA4A
TUBA4B
TUBA8
TUBAL3
TUBB1
TUBB2A
TUBB2B
TUBB3
TUBB4A
TUBB4B
TUBB6
TUBB8
TUBB8B
UBA52
UBAP1
UBE2V1
DDRGK1
KLHL3
LGALS8
PJVK
RETREG1
RETREG3
RIPK2
STBD1
STING1
TEX264
UBA5
UFC1
UFL1
UFM1
WDR81
IFNA1
IFNA10
IFNA13
IFNA14
IFNA16
IFNA17
IFNA2
IFNA21
IFNA4
IFNA5
IFNA6
IFNA7
IFNA8
ACER2
ATP6V0A1
ATP6V0A2
ATP6V0B
ATP6V0C
ATP6V0D1
ATP6V0D2
ATP6V0E1
ATP6V0E2
ATP6V1A
ATP6V1B1
ATP6V1B2
ATP6V1C1
ATP6V1C2
ATP6V1D
ATP6V1E1
ATP6V1E2
ATP6V1G1
ATP6V1G2
ATP6V1H
CDK5R1
CTTN
DEPDC5
DEPP1
DHRSX
ELAPOR1
ERCC4
FYCO1
FZD5
GBA
GPR137
GPR137B
GPSM1
GSK3A
HAX1
HSPB1
IL4
MAP3K7
MFSD8
MTCL1
NEDD4
NLRP6
NPRL2
ORMDL3
OSBPL7
PIM2
PYCARD
RAB39B
RAB3GAP1
RAB3GAP2
RMC1
ROCK1
RUFY4
SNX32
SNX5
SNX6
SOGA1
SOGA3
SREBF1
SREBF2
TICAM1
TMEM150A
TMEM150B
TMEM150C
TRIB3
TRIM14
TRIM27
TRIM34
TRIM38
TRIM6
TRIM68
TRIML1
TRIML2
UBQLN2
UCHL1
VPS26A
VPS26B
VPS35
WDR41
ZMPSTE24
FTH1
FTL
ATP5IF1
HK2
MUL1
ILRUN
STX12
VMA21
RUBCNL
ELAPOR2
ATG12P1
ATG3P1
ATG12P2
ATG4AP1
LOC727709
TARDBP
FLNC
FUS
TECPR2
HNRNPA1
TMEM208
ATXN3
PFN1
PPARGC1A
ATP12A
CCDC115
TMEM199
ATXN2
LGALS3
MATR3
ATP4A
FLVCR2
SRPK3
MALAT1
HDAC10
DCTN1
TRIM16
UNC45B
CYCS
CCNF
IL23R
CHCHD10
FIG4
NLRX1
VAPB
LOC109504728
PICALM
RNF166
TAX1BP1
ANG
ANXA11
PSEN1
BSN
TRIM23
FNBP1L
NEK1
CAV1
APOE
RAB33A
TOLLIP
RAB23
RNF185
AIFM1
CASP9
NEFH
GLE1
UNC13A
FNIP1
TLR4
LMNA
ACE2
XIAP
CD44
MIR155
YWHAZ
RAB39A
FNIP2
MIR30A
DAO
TNFAIP3
DENND3
CD5L
CASP7
PMAIP1
TIA1
SGPP1
RAB18
YWHAE
CFAP410
PDCD6IP
SYT11
IL17A
YY1
TMEM41B
PAWR
MIR34A
PON1
PON3
PRPH
PON2
TAF15
GLT8D1
RNASE4
ALS3
ALS7
LOC108903148
IRF3
MIR21
BIK
BECN1P2
YWHAB
LRRC25
RAB35
HSP90B1
MAP1LC3B2
ABCE1
GRAMD1A
PIK3R1
HOTAIR
YAP1
ARG2
RAB21
TMBIM6
ITGB3
S100A4
MIR142
TFRC
BCAS3
AR
TRIM50
RIPK3
PDCD4
RACK1
AGER
RAB8B
CD40LG
SPTAN1
OFD1
TNFRSF1A
PLEKHM2
SIGMAR1
MIR20A
HSPA4
TLR2
ISG15
COPB1
TGM2
TANK
OLR1
ATP2A2
CRY1
NR4A1
BCAP31
RAB26
USP14
DCP2
ANXA5
STX5
LMNB1
STK3
DAXX
MYCBP2

## Sheet: HADb database
id
AMBRA1
APOL1
ARNT
ARSA
ARSB
ATF4
ATF6
ATG10
ATG12
ATG16L1
ATG16L2
ATG2A
ATG2B
ATG3
ATG4A
ATG4B
ATG4C
ATG4D
ATG5
ATG7
ATG9A
ATG9B
ATIC
BAG1
BAG3
BAK1
BAX
BCL2
BCL2L1
BECN1
BID
BIRC5
BIRC6
BNIP1
BNIP3
BNIP3L
C12orf44
C17orf88
CALCOCO2
CAMKK2
CANX
CAPN1
CAPN10
CAPN2
CAPNS1
CASP1
CASP3
CASP4
CASP8
CCL2
CCR2
CD46
CDKN1A
CDKN1B
CDKN2A
CFLAR
CHMP2B
CHMP4B
CLN3
CTSB
CTSD
CTSL1
CX3CL1
CXCR4
DAPK1
DAPK2
DDIT3
DIRAS3
DLC1
DNAJB1
DNAJB9
DRAM1
EDEM1
EEF2
EEF2K
EGFR
EIF2AK2
EIF2AK3
EIF2S1
EIF4EBP1
EIF4G1
ERBB2
ERN1
ERO1L
FADD
FAM48A
FAS
FKBP1A
FKBP1B
FOS
FOXO1
FOXO3
GAA
GABARAP
GABARAPL1
GABARAPL2
GAPDH
GNAI3
GNB2L1
GOPC
GRID1
GRID2
HDAC1
HDAC6
HGS
HIF1A
HSP90AB1
HSPA5
HSPA8
HSPB8
IFNG
IKBKB
IKBKE
IL24
IRGM
ITGA3
ITGA6
ITGB1
ITGB4
ITPR1
KIAA0226
KIAA0652
KIAA0831
KIF5B
KLHL24
LAMP1
LAMP2
MAP1LC3A
MAP1LC3B
MAP1LC3C
MAP2K7
MAPK1
MAPK3
MAPK8
MAPK8IP1
MAPK9
MBTPS2
MLST8
MTMR14
MTOR
MYC
NAF1
NAMPT
NBR1
NCKAP1
NFE2L2
NFKB1
NKX2-3
NLRC4
NPC1
NRG1
NRG2
NRG3
P4HB
PARK2
PARP1
PEA15
PELP1
PEX14
PEX3
PIK3C3
PIK3R4
PINK1
PPP1R15A
PRKAB1
PRKAR1A
PRKCD
PRKCQ
PTEN
PTK6
RAB11A
RAB1A
RAB24
RAB33B
RAB5A
RAB7A
RAC1
RAF1
RB1
RB1CC1
RELA
RGS19
RHEB
RPS6KB1
RPTOR
SAR1A
SERPINA1
SESN2
SH3GLB1
SIRT1
SIRT2
SPHK1
SPNS1
SQSTM1
ST13
STK11
TBK1
TM9SF1
TMEM49
TMEM74
TNFSF10
TP53
TP53INP2
TP63
TP73
TSC1
TSC2
TUSC1
ULK1
ULK2
ULK3
USP10
UVRAG
VAMP3
VAMP7
VEGFA
WDFY3
WDR45
WDR45L
WIPI1
WIPI2
ZFYVE1

## Sheet: AUTOPHAGY DATABASE
id
ABCB6
ABL1
ABL2
ABR
ACAP2
ACAP3
ACBD5
ACTA1
ACTA2
ACTB
ACTC1
ACTG1
ACTG2
ACTR2
ACTR3
ACTR3B
AES
AFG3L2
AGFG1
AKT1
AKT1S1
AKT2
AKT3
ALK
ALPI
ALPL
ALPP
ALPPL2
AMBRA1
ANK1
ANK2
ANK3
ANKK1
ANKRD28
ANKRD44
AP1AR
AP1B1
AP1G1
AP1G2
AP1M1
AP1M2
AP1S1
AP1S2
AP1S3
AP2A1
AP2A2
AP2B1
AP2M1
AP2S1
AP3D1
AP3M1
AP3M2
AP4B1
AP4E1
AP4M1
APAF1
ARAF
ARF6
ARFGEF1
ARFGEF2
ARHGAP10
ARHGAP26
ARHGAP42
ARHGEF17
ARHGEF4
ARHGEF9
ARL2
ARNT
ARNT2
ARNTL
ARNTL2
ATF4
ATG10
ATG101
ATG12
ATG13
ATG14
ATG16L1
ATG16L2
ATG2A
ATG2B
ATG3
ATG4A
ATG4B
ATG4C
ATG4D
ATG5
ATG7
ATG9A
ATG9B
ATM
ATR
AURKA
AXL
BAG3
BCL2
BCL2L1
BCR
BDNF
BECN1
BECN2
BLK
BNIP3
BRAF
BRSK1
BRSK2
CALCOCO2
CAMK1
CAMK1D
CAMK1G
CAMK2B
CAMK2D
CAMK2G
CAMKK1
CAMKK2
CAPN1
CAPN10
CAPN11
CAPN12
CAPN13
CAPN14
CAPN2
CAPN3
CAPN5
CAPN6
CAPN7
CAPN8
CAPN9
CAPNS1
CAPNS2
CASP3
CDK1
CDK11A
CDK13
CDK16
CDK17
CDK18
CDK2
CDK5
CDKL1
CDKL4
CDKL5
CDKN1B
CDKN2A
CELF1
CELF3
CELF5
CHUK
CLEC16A
CLOCK
CLTA
CLTB
CLTC
CSNK1A1L
CSNK1D
CSNK1G2
CSNK2A1
CSNK2A2
CSNK2B
CTSB
CTSD
CTSE
CTSL
CTSV
DAPK1
DAPK3
DAW1
DDIT4
DEPTOR
DES
DIRAS3
DNM1
DNM1L
DNM2
DNM3
DNPEP
DRAM2
E2F1
E2F2
EEF1A1
EEF1A2
EGFR
EI24
EIF2AK1
EIF2AK2
EIF2AK3
EIF2AK4
EIF2S1
EIF4E
EIF4E1B
EIF4EBP1
EIF4EBP2
EIF4EBP3
EPAS1
EPG5
EPHA2
EPHA3
EPHA4
EPHA5
EPHB1
EPHB2
EPHB3
EPN1
EPN2
EPN3
ERBB2
ERBB3
ERBB4
ERN1
ERN2
EVA1A
EXOC1
EXOC2
EXOC3
EXOC3L1
EXOC3L4
EXOC4
EXOC5
EXOC6
EXOC6B
EXOC7
EXOC8
FBXW7
FGFR1
FGFR2
FGFR3
FGR
FIS1
FKBP1A
FKBP8
FOS
FOXO1
FOXO3
FUNDC1
GABARAP
GABARAPL1
GABARAPL2
GABARAPL3
GAPDH
GAPDHS
GBF1
GFAP
GLIPR2
GOPC
GRAMD1B
GRB2
HARBI1
HCK
HDAC1
HDAC4
HDAC5
HDAC6
HDAC7
HIF1A
HIF3A
HRAS
HSPA1A
HSPA1B
HSPA1L
HSPA2
HSPA5
HSPA6
HSPA8
HUNK
IARS
IGF1R
INS
INSR
INSRR
IRGM
IRS1
IRS2
IRS4
ITPR1
ITPR2
ITPR3
JUN
KAT5
KAT6A
KAT6B
KAT7
KAT8
KEAP1
KIAA0226L
KLHL1
KLHL12
KLHL13
KLHL17
KLHL18
KLHL2
KLHL20
KLHL24
KLHL28
KLHL4
KLHL5
KLHL8
KPNA6
KRAS
KRT5
KRT6A
KRT6B
KRT6C
KRT71
KRT72
KRT73
KRT74
KRT75
KRT76
KRT79
KRT8
KRT81
KRT82
KRT83
KRT84
KRT85
KSR1
LAMP1
LAMP2
LATS2
LCK
LPIN1
LPIN2
LRBA
LRSAM1
LYST
MAN2A2
MAN2B1
MAN2C1
MAP1LC3A
MAP1LC3B
MAP1LC3C
MAP2K1
MAP2K2
MAP2K3
MAP2K4
MAP2K5
MAP2K7
MAP3K14
MAP3K6
MAP4K1
MAP4K2
MAP4K3
MAP4K5
MAPK1
MAPK10
MAPK14
MAPK15
MAPK3
MAPK7
MAPK8
MAPK8IP1
MAPKAP1
MARK1
MARK2
MARK3
MARK4
Mb3875
MELK
MERTK
MFN1
MFN2
MINK1
MITF
MLST8
MTM1
MTMR1
MTMR14
MTMR2
MTMR4
MTMR6
MTMR7
MTMR8
MTMR9
MTOR
MTRF1L
MX1
MX2
MYD88
MYLK
MYLK3
MYO3A
NAPSA
NBEA
NBR1
NCOA4
NFE2L1
NFE2L2
NFE2L3
NFKB1
NFKB2
NFKBIA
NFKBIB
NFKBID
NFKBIE
NFKBIZ
NLRC3
NLRC5
NLRP1
NLRP12
NLRP13
NLRP14
NLRP3
NLRP4
NLRP5
NLRP7
NLRP8
NLRP9
NOD1
NOD2
NPAS2
NPAS3
NRAS
NRBF2
NTRK2
NUAK1
NUAK2
NVL
OPA1
OPHN1
PA2G4
PAK1
PAK2
PAK3
PAK4
PAK6
PAK7
PARK2
PDK1
PDPK1
PEX1
PEX5
PEX5L
PGA3
PGA4
PGA5
PGAM5
PI4KB
PIK3C2A
PIK3C2B
PIK3C3
PIK3CA
PIK3CB
PIK3CD
PIK3CG
PIK3R4
PINK1
PIP4K2A
PIP5K1A
PIP5K1B
PIP5K1C
PKN1
PKN2
PKN3
PLCB4
PLCD1
PLCG1
PLCH1
PLCH2
PLD1
PLD2
PNCK
POC1A
POC1B
PPP1CA
PPP1CC
PPP2CA
PPP2CB
PPP2R1A
PPP2R1B
PPP2R2A
PPP2R2B
PPP2R2C
PPP2R2D
PPP2R3A
PPP2R3B
PPP2R3C
PPP2R4
PPP2R5A
PPP2R5B
PPP2R5C
PPP2R5D
PPP2R5E
PPP4C
PPP6C
PREX1
PREX2
PRKAA1
PRKAA2
PRKAB1
PRKAB2
PRKACA
PRKACB
PRKCA
PRKCB
PRKCD
PRKCE
PRKCG
PRKCH
PRKCI
PRKCQ
PRKCZ
PRKDC
PRMT1
PRMT3
PRMT8
PRR5
PRR5L
PTEN
RAB10
RAB12
RAB1A
RAB1B
RAB33B
RAB5A
RAB5B
RAB5C
RAB7A
RAB8A
RAB9A
RABGEF1
RAF1
RALA
RALB
RALGAPA1
RALGAPA2
RB1CC1
RCAN1
REL
RELA
RELB
RET
RGL1
RGS19
RHEB
RICTOR
RIPK1
RIPK4
RPS6KA1
RPS6KA3
RPS6KA4
RPS6KA6
RPS6KB1
RPS6KB2
RPTOR
RRAGA
RRAGB
RRAGC
RRAGD
RUBCN
RUNX1
RUNX3
RYR1
RYR2
SAR1A
SAR1B
SBF2
SCOC
SEC16A
SEC16B
SEC23A
SEC23B
SEC24B
SEC24C
SEC24D
SESN1
SESN2
SESN3
SGK2
SH3GL1
SH3GL2
SH3GL3
SH3GLB1
SH3GLB2
SHC1
SHC2
SHC3
SHC4
SIDT1
SIDT2
SIK1
SIK2
SIK3
SIM2
SIN3A
SIN3B
SIPA1L3
SIRT1
SLC1A1
SLC1A2
SLC1A4
SLC1A5
SLC1A6
SLC1A7
SLC36A1
SLC36A4
SLC3A1
SLC3A2
SLC7A10
SLC7A11
SLC7A5
SLC7A6
SLC7A7
SLC7A8
SLC7A9
SMPD1
SMPDL3B
SNAP29
SNRK
SNRNP40
SNX1
SNX30
SNX4
SOD1
SOD2
SOS1
SOS2
SPATA13
SPATA5
SPATA5L1
SPG7
SQSTM1
SRC
STK11
STK24
STK25
STK26
STK36
STK38L
STK4
STX17
STX7
STX8
STXBP1
STXBP2
STXBP3
SUPT20H
TBC1D12
TBC1D14
TBC1D25
TBC1D4
TBC1D5
TBC1D7
TBK1
TECPR1
TELO2
TEP1
TFE3
TFEB
TGFBRAP1
TIGAR
TM9SF1
TM9SF2
TM9SF3
TM9SF4
TMEM173
TMEM74
TNFAIP2
TNIK
TNS1
TNS2
TNS3
TOMM7
TOR1B
TP53INP2
TPR
TPTE2
TRADD
TRAF1
TRAF2
TRAF3
TRAF4
TRAF5
TRAF6
TRAPPC1
TRAPPC10
TRAPPC2
TRAPPC3
TRAPPC4
TRAPPC5
TRAPPC6A
TRAPPC6B
TRAPPC8
TRAPPC9
TRRAP
TSC1
TSC2
UBB
UBC
UBE2A
UBE2D2
UBE2D3
UBE2H
UBE2J2
UBE2L3
UBE2N
UGT1A1
UGT1A10
UGT1A6
UGT1A9
UGT2A1
UGT2A3
UGT2B10
UGT2B15
UGT2B17
UGT2B28
UGT2B4
UGT2B7
ULK1
ULK2
ULK3
UVRAG
VAMP3
VAMP7
VAMP8
VCP
VDAC1
VDAC2
VDAC3
VIM
VMP1
VPS13A
VPS13C
VPS16
VPS18
VPS33A
VPS33B
VPS39
VPS41
VPS45
VTI1B
WAC
WDFY3
WDFY4
WDR3
WDR45
WDR45B
WDR5
WDR5B
WIPI1
WIPI2
YES1
YME1L1
ZFYVE1

## Sheet: HAMDB
id
ABHD5
ABL1
ABL2
ACBD5
AKT1
AKT2
AKT3
AMFR
ANXA7
APOL1
APOL6
APP
ARF6
ATG10
ATG14
ATG16L1
ATG2A
ATG2B
ATG4B
ATG4C
ATG5
ATG7
ATG9
ATG9A
ATG9B
ATM
AURKA
BAD
BAIAP2
BAX
BBC3
BCL2
BCL2L1
BCL2L11
BECN1
BIRC2
BIRC5
BIRC6
BNIP3
BNIP3L
BOK
BST2
C19orf12
C9orf72
CALCOCO2
CAMP
CAPN1
CAPNS1
CAT
CATSPER4
CCND1
CDKN1B
CDKN2A
CDKN2D
CHEK1
CHMP2A
CHMP2B
CHMP3
CHMP4A
CHMP4B
CHMP4C
CHMP6
CHRND
CHUK
CISD1
CISD2
CLTC
COPZ1
COX5A
CTNNB1
CTSL
CXCL12
CXCR3
CYB5A
DAP
DAP3
DAPK1
DAPK2
DAPK3
DCN
DEPTOR
DICER1
DNAJA3
DNM1L
DRAM1
DRAM2
E2F1
EEF2
EEF2K
EGFR
EIF2AK2
EIF2AK3
EIF4EBP1
EIF4G1
EIF4G2
ENG
EP300
EPHB2
EPM2A
ERN1
EXOC2
FADD
FAS
FBXL2
FBXL20
FBXO7
FIS1
FLCN
FN1
FOXO1
FUNDC1
GAA
GAB1
GABARAPL1
GABARAPL2
GABBR2
GHRL
GJA4
GNAI3
GNRH2
GOLGA2
GOPC
GPR18
GPR182
GPR37
GRID2
GSK3B
GTF2IRD2
GTF2IRD2B
HDAC6
HGS
HIF1A
HIVEP2
HMGB1
HRAS
HSF1
HSP90AA1
HSPA8
HSPG2
HTR2B
HTT
ICMT
IFNG
IKBKB
IKBKG
IL24
IL6
IRGM
ITGB4
ITPR1
KAT8
KDM4A
KDR
KIAA1524
KIF25
KIF5C
KRAS
KRT18
LACRT
LAMP2
LAMP3
LAPTM4B
LARP1
LEP
LEPR
LETM1
PRODH
LRRK2
LZTS1
MAP1LC3A
MAP1LC3B
MAP1S
MAP2K1
MAP2K2
MAPK14
MAPK8
MAPT
MCL1
MCOLN1
MCOLN3
MDM2
MEFV
MEGF10
MET
MFN1
MID2
MITF
MMP10
MTDH
MTMR3
MTOR
MVB12A
MYL3
NACC1
NAF1
NBR1
NCR3
NDRG1
NEU3
NFE2L2
NLRP4
NOD2
NOS1
NOS2
NOS3
NPC1
NRBF2
NRBP2
NUPR1
OCRL
OPTN
PAFAH1B2
PARK2
PCGF1
PDK1
PDK2
PDK4
PGAM5
PIK3C3
PIK3CA
PIK3CB
PIK3R2
PINK1
PIP4K2A
PIP4K2B
PIP4K2C
PKM
PLD1
PLD2
PLEKHF1
PLG
PLK2
PPFIA4
PRKAA1
PRKAA2
PRKCD
PRKD1
PRKDC
PSAP
PTEN
PTGER2
PTPN22
QSOX1
RAB11A
RAB1A
RAC3
RASIP1
RELA
RGS19
RNASEL
RNF152
RPS6KB1
RPTOR
RRAGA
RUBCN
S100A8
S100A9
S1PR3
SCOC
SDHB
SERPINA1
SESN2
SGSM2
SH3BP4
SH3GLB1
SHC1
SIK2
SIRT1
SIRT2
SIRT6
SMAD2
SMAD4
SMPD1
SMYD3
SNAI1
SNCA
SNF8
SNRPE
SOD1
SOD2
SORCS2
SPHK1
SQSTM1
STAM
STAM2
STIM1
STK11
STK38
SUPT20H
SUPT5H
SVIP
TAB2
TAB3
TACR2
TBC1D10A
TBC1D10B
TBC1D10C
TBC1D14
TBC1D16
TBC1D17
TBC1D4
TBC1D5
TBC1D7
TBC1D9
TBC1D9B
TBK1
TCHP
TECPR1
TFE3
TFEB
TGFB1
THBS2
TMEM59
TMEM74
TNF
TNFRSF10B
TNFSF10
TP53
TP53INP1
TP63
TP73
TPCN1
TPCN2
TRIM13
TRIM17
TRIM21
TRIM22
TRIM5
TRIM65
TRIM8
TSC2
TSG101
TUFM
UBASH3B
UBQLN1
ULK1
ULK2
ULK3
USP10
USP13
USP19
USP30
USP33
UVRAG
VCP
VPS13A
VPS25
VPS28
VPS36
VPS37A
VPS37B
VPS37C
VPS37D
VPS39
VPS51
VTI1A
WAC
WDR24
WDR45
WDR6
XBP1
XPO1
YWHAQ
ZC3H12A
ZFYVE1
ZKSCAN3

## Sheet: MsigDB
name	number of genes
GOBP_CHAPERONE_MEDIATED_AUTOPHAGY	16
GOBP_LIPOPHAGY	7
GOBP_MITOPHAGY	24
GOBP_MODULATION_BY_SYMBIONT_OF_HOST_AUTO_AUTOPHAGY	7
GOBP_NEGATIVE_REGULATION_OF_AUTOPHAGY	83
GOBP_POSITIVE_REGULATION_OF_AUTOPHAGY	120
GOBP_REGULATION_OF_AUTOPHAGY	328
GOBP_REGULATION_OF_AUTOPHAGY_OF_MITOCHONOCHONDRION_IN_RESPONSE_TO_MITOCHONDRIAL_RIAL_DEPOLARIZATION	14
GOBP_SELECTIVE_AUTOPHAGY	62
GOBP_XENOPHAGY	10
GOCC_AUTOLYSOSOME	10
GOCC_PHAGOPHORE_ASSEMBLY_SITE	31
KEGG_REGULATION_OF_AUTOPHAGY	35
REACTOME_AUTOPHAGY	151
REACTOME_CHAPERONE_MEDIATED_AUTOPHAGY	22
REACTOME_SELECTIVE_AUTOPHAGY	82
WP_AUTOPHAGY	30
WP_HOSTPATHOGEN_INTERACTION_OF_HUMAN_CORN_CORONA_VIRUSES_AUTOPHAGY	19
WP_SENESCENCE_AND_AUTOPHAGY_IN_CANCER	108

## Sheet: MsigDB_genes (557)
id
ADRA1A
AKT1
ATG7
BCL2
BECN1
BMF
CHMP4A
CHMP4B
CLEC16A
CPTP
CTSA
DAP
DAPL1
EIF4G1
EIF4G2
FEZ1
FEZ2
FOXK1
FOXK2
GATA4
GOLGA2
HERC1
HGF
HMOX1
HTR2B
IL10
IL10RA
KDM4A
KIF25
KLHL22
LEP
LEPR
LRRK2
LZTS1
MCL1
MET
MIR199A1
MIRLET7B
MT3
MTM1
MTMR8
MTMR9
MTOR
NPC1
NRBP2
NUPR1
PHF23
PIK3CA
PINK1
POLDIP2
PTPN22
QSOX1
RASIP1
RNF41
RNF5
RRAGA
RUBCN
SCFD1
SEC22B
SIRT2
SMCR8
SMG1
SNCA
SNRNP70
STAT3
TAB2
TAB3
TBC1D14
TIGAR
TLK2
TMEM39A
TMEM39B
TP53
TREM2
TSC1
TSC2
TSPO
UBQLN4
USP30
USP36
WASHC1
WDR6
ZKSCAN3
CDC37
HDAC6
HTRA2
HUWE1
MAP1LC3B
MFN2
OPTN
PHB2
PRKN
SQSTM1
TOMM7
VDAC1
VPS13C
VPS13D
ATP13A2
BAG3
CLU
EEF1A1
EEF1A2
GFAP
HSP90AA1
HSPA8
LAMP2
PLK3
STUB1
SYNPO2
ADRB2
AUP1
HTT
RAB7A
SESN2
SPTLC1
SPTLC2
CDKN1A
CDKN1B
CDKN2A
CEBPB
COL10A1
COL1A1
COL3A1
CREG1
CXCL1
CXCL14
CXCL8
E2F1
FKBP8
FN1
GABARAP
GABARAPL1
GABARAPL2
GSK3B
GSN
HMGA1
HRAS
IFI16
IFNB1
IFNG
IGF1
IGF1R
IGFBP3
IGFBP5
IGFBP7
IL1A
IL1B
IL24
IL3
IL6
IL6R
IL6ST
ING1
ING2
INHBA
INS
IRF1
IRF5
IRF7
JUN
KMT2A
LAMP1
MAP1LC3A
MAP1LC3C
MAP2K1
MAP2K3
MAPK1
MAPK14
MDM2
MIR29B2
MIR29C
MIR3606
MLST8
MMP14
PCNA
PIK3C3
PLAT
PLAU
PTEN
RAF1
RB1
RB1CC1
RNASEL
RSL1D1
SERPINB2
SERPINE1
SH3GLB1
SLC39A1
SLC39A2
SLC39A3
SLC39A4
SMAD3
SMAD4
SPARC
SRC
TGFB1
THBS1
TNFSF15
ULK1
UVRAG
VTN
AMBRA1
ARL13B
ATG10
ATG101
ATG12
ATG13
ATG14
ATG16L1
ATG3
ATG4A
ATG4B
ATG4C
ATG4D
ATG5
ATG9A
ATG9B
ATM
CETN1
CFTR
CHMP2A
CHMP2B
CHMP3
CHMP4C
CHMP6
CHMP7
CSNK2A1
CSNK2A2
CSNK2B
DYNC1H1
DYNC1I1
DYNC1I2
DYNC1LI1
DYNC1LI2
DYNLL1
DYNLL2
EPAS1
FUNDC1
HBB
HSF1
HSP90AB1
IFT88
LAMTOR1
LAMTOR2
LAMTOR3
LAMTOR4
LAMTOR5
MFN1
MTERF3
MTMR14
MTMR3
MVB12A
MVB12B
NBR1
PARK7
PCNT
PEX5
PGAM5
PIK3R4
PLIN2
PLIN3
PRKAA1
PRKAA2
PRKAB1
PRKAB2
PRKAG1
PRKAG2
PRKAG3
RHEB
RNASE1
RPS27A
RPTOR
RRAGB
RRAGC
RRAGD
SLC38A9
TOMM20
TOMM22
TOMM40
TOMM5
TOMM6
TOMM70
TSG101
TUBA1A
TUBA1B
TUBA1C
TUBA3C
TUBA3D
TUBA3E
TUBA4A
TUBA4B
TUBA8
TUBAL3
TUBB1
TUBB2A
TUBB2B
TUBB3
TUBB4A
TUBB4B
TUBB6
TUBB8
TUBB8B
UBA52
UBAP1
UBB
UBC
UBE2N
UBE2V1
VCP
VIM
VPS28
VPS37A
VPS37B
VPS37C
VPS37D
WDR45
WDR45B
WIPI1
WIPI2
ATG2A
ATG2B
CALCOCO2
DDRGK1
HSPB8
KLHL3
LGALS8
LRSAM1
MAPK3
NOD1
NOD2
PJVK
RETREG1
RETREG3
RIPK2
STBD1
STING1
TBK1
TEX264
UBA5
UBQLN1
UFC1
UFL1
UFM1
WDFY3
WDR81
BECN2
IFNA1
IFNA10
IFNA13
IFNA14
IFNA16
IFNA17
IFNA2
IFNA21
IFNA4
IFNA5
IFNA6
IFNA7
IFNA8
ULK2
ULK3
ZFYVE1
EIF2AK4
IRGM
ABL1
ABL2
ACER2
ATF6
ATP6V0A1
ATP6V0A2
ATP6V0B
ATP6V0C
ATP6V0D1
ATP6V0D2
ATP6V0E1
ATP6V0E2
ATP6V1A
ATP6V1B1
ATP6V1B2
ATP6V1C1
ATP6V1C2
ATP6V1D
ATP6V1E1
ATP6V1E2
ATP6V1G1
ATP6V1G2
ATP6V1H
BAD
BCL2L11
BNIP3
BNIP3L
BOK
C9orf72
CAMKK2
CAPN1
CAPNS1
CASP1
CASP3
CDK5
CDK5R1
CISD2
CLN3
CTTN
DAPK1
DAPK2
DAPK3
DCN
DDIT3
DEPDC5
DEPP1
DHRSX
DNM1L
DRAM1
DRAM2
ELAPOR1
EP300
EPM2A
ERCC4
ERN1
EXOC1
EXOC4
EXOC7
EXOC8
FBXL2
FBXO7
FBXW7
FLCN
FOXO1
FOXO3
FYCO1
FZD5
GAPDH
GBA
GNAI3
GPR137
GPR137B
GPSM1
GSK3A
HAX1
HIF1A
HMGB1
HSPB1
IKBKG
IL4
ITPR1
KAT5
KAT8
KDR
KEAP1
LACRT
LAMP3
LARP1
MAP3K7
MAPK15
MAPK8
MAPT
MEFV
MFSD8
MID2
MTCL1
MTDH
MTMR4
NEDD4
NLRP6
NPRL2
ORMDL3
OSBPL7
PAFAH1B2
PIK3C2A
PIK3CB
PIK3R2
PIM2
PIP4K2A
PIP4K2B
PIP4K2C
PLEKHF1
PLK2
PRKACA
PRKD1
PSAP
PYCARD
RAB39B
RAB3GAP1
RAB3GAP2
RAB8A
RALB
RMC1
RNF152
ROCK1
RUFY4
SCOC
SESN1
SESN3
SH3BP4
SIRT1
SNX32
SNX5
SNX6
SOGA1
SOGA3
SREBF1
SREBF2
STK11
SUPT5H
SVIP
TBC1D25
TFEB
TICAM1
TMEM150A
TMEM150B
TMEM150C
TMEM59
TP53INP1
TP53INP2
TPCN1
TPCN2
TRIB3
TRIM13
TRIM14
TRIM21
TRIM22
TRIM27
TRIM34
TRIM38
TRIM5
TRIM6
TRIM65
TRIM68
TRIM8
TRIML1
TRIML2
UBQLN2
UCHL1
USP10
USP13
USP33
VPS26A
VPS26B
VPS35
WAC
WDR24
WDR41
ZC3H12A
ZMPSTE24
FTH1
FTL
NCOA4
ATP5IF1
HK2
MUL1
ILRUN
RAB1B
STX12
TRAPPC8
VMP1
AKT1S1
DEPTOR

## Sheet: GeneCards (Score >= 1.0)
Symbol	Description	Category	GIFtS	GC id	Score
ATG5	Autophagy Related 5	Protein Coding	41	GC06M106045	36.09
VMA21	Vacuolar ATPase Assembly Factor VMA21	Protein Coding	35	GC0XP151396	32.71
BECN1	Beclin 1	Protein Coding	44	GC17M042810	31.59
ATG16L1	Autophagy Related 16 Like 1	Protein Coding	41	GC02P233220	31.32
ATG14	Autophagy Related 14	Protein Coding	35	GC14M055366	30.33
ULK1	Unc-51 Like Autophagy Activating Kinase 1	Protein Coding	43	GC12P131894	29.04
ATG7	Autophagy Related 7	Protein Coding	41	GC03P011446	27.72
ATG12	Autophagy Related 12	Protein Coding	40	GC05M115828	27.62
ATG3	Autophagy Related 3	Protein Coding	39	GC03M112532	27.28
ATG4B	Autophagy Related 4B Cysteine Peptidase	Protein Coding	39	GC02P241637	26.08
ATG13	Autophagy Related 13	Protein Coding	36	GC11P046636	24.88
ATG4A	Autophagy Related 4A Cysteine Peptidase	Protein Coding	40	GC0XP108091	24.09
ATG4D	Autophagy Related 4D Cysteine Peptidase	Protein Coding	36	GC19P010543	23.62
ATG4C	Autophagy Related 4C Cysteine Peptidase	Protein Coding	37	GC01P062784	23.14
ATG10	Autophagy Related 10	Protein Coding	37	GC05P081972	23.1
ATG9A	Autophagy Related 9A	Protein Coding	37	GC02M219219	22.66
EPG5	Ectopic P-Granules Autophagy Protein 5 Homolog	Protein Coding	35	GC18M045800	21.91
AMBRA1	Autophagy And Beclin 1 Regulator 1	Protein Coding	37	GC11M076918	21.7
SQSTM1	Sequestosome 1	Protein Coding	46	GC05P179806	21.43
ATG9B	Autophagy Related 9B	Protein Coding	34	GC07M151012	21.23
ATG2B	Autophagy Related 2B	Protein Coding	33	GC14M097769	20.31
DRAM1	DNA Damage Regulated Autophagy Modulator 1	Protein Coding	29	GC12P101877	20.12
ULK2	Unc-51 Like Autophagy Activating Kinase 2	Protein Coding	39	GC17M023251	19.2
DRAM2	DNA Damage Regulated Autophagy Modulator 2	Protein Coding	37	GC01M111117	18.91
ATG16L2	Autophagy Related 16 Like 2	Protein Coding	33	GC11P072814	18.87
ATG2A	Autophagy Related 2A	Protein Coding	35	GC11M077420	18.55
ATG101	Autophagy Related 101	Protein Coding	33	GC12P052069	16.7
RUBCNL	Rubicon Like Autophagy Enhancer	Protein Coding	24	GC13M046343	16.59
MAP1LC3A	Microtubule Associated Protein 1 Light Chain 3 Alpha	Protein Coding	41	GC20P034546	16.4
RUBCN	Rubicon Autophagy Regulator	Protein Coding	32	GC03M197882	16.23
MAP1LC3B	Microtubule Associated Protein 1 Light Chain 3 Beta	Protein Coding	40	GC16P087384	15.83
LAMP2	Lysosomal Associated Membrane Protein 2	Protein Coding	42	GC0XM120426	15.28
SOGA1	Suppressor Of Glucose, Autophagy Associated 1	Protein Coding	30	GC20M036777	15.27
MTOR	Mechanistic Target Of Rapamycin Kinase	Protein Coding	52	GC01M011106	15.25
NBR1	NBR1 Autophagy Cargo Receptor	Protein Coding	36	GC17P043170	13.9
ELAPOR1	Endosome-Lysosome Associated Apoptosis And Autophagy Regulator 1	Protein Coding	26	GC01P109156	13.7
PIK3C3	Phosphatidylinositol 3-Kinase Catalytic Subunit Type 3	Protein Coding	47	GC18P041955	13.57
EI24	EI24 Autophagy Associated Transmembrane Protein	Protein Coding	35	GC11P125570	12.89
DEPP1	DEPP1 Autophagy Regulator	Protein Coding	24	GC10M044971	12.78
MAP1LC3C	Microtubule Associated Protein 1 Light Chain 3 Gamma	Protein Coding	32	GC01M241995	11.87
GABARAP	GABA Type A Receptor-Associated Protein	Protein Coding	42	GC17M007240	11.81
RB1CC1	RB1 Inducible Coiled-Coil 1	Protein Coding	41	GC08M052622	10.96
FYCO1	FYVE And Coiled-Coil Domain Autophagy Adaptor 1	Protein Coding	39	GC03M045917	10.78
ELAPOR2	Endosome-Lysosome Associated Apoptosis And Autophagy Regulator Family Member 2	Protein Coding	25	GC07M086877	10.77
ATG12P1	Autophagy Related 12 Pseudogene 1	Pseudogene	6	GC17M073067	10.71
HMGB1	High Mobility Group Box 1	Protein Coding	43	GC13M030456	10.65
BCL2	BCL2 Apoptosis Regulator	Protein Coding	48	GC18M063123	10.38
ATG3P1	Autophagy Related 3 Pseudogene 1	Pseudogene	5	GC20M039328	10.24
C9orf72	C9orf72-SMCR8 Complex Subunit	Protein Coding	40	GC09M027863	10.13
GABARAPL2	GABA Type A Receptor Associated Protein Like 2	Protein Coding	41	GC16P075566	10.1
ATG12P2	Autophagy Related 12 Pseudogene 2	Pseudogene	6	GC02M222901	9.8
OPTN	Optineurin	Protein Coding	43	GC10P013099	9.72
UVRAG	UV Radiation Resistance Associated	Protein Coding	41	GC11P075815	9.61
PIK3R4	Phosphoinositide-3-Kinase Regulatory Subunit 4	Protein Coding	45	GC03M130678	9.56
ATG4AP1	Autophagy Related 4A Cysteine Peptidase Pseudogene 1	Pseudogene	4	GC0XP082998	9.27
GABARAPL1	GABA Type A Receptor Associated Protein Like 1	Protein Coding	41	GC12P010212	8.93
TP53	Tumor Protein P53	Protein Coding	51	GC17M007661	8.92
WIPI1	WD Repeat Domain, Phosphoinositide Interacting 1	Protein Coding	37	GC17M068420	8.9
LOC727709	DNA Damage Regulated Autophagy Modulator 1 Pseudogene	Pseudogene	2	GC04P122739	8.58
TFEB	Transcription Factor EB	Protein Coding	40	GC06M054395	8.54
TBK1	TANK Binding Kinase 1	Protein Coding	47	GC12P064451	8.52
WIPI2	WD Repeat Domain, Phosphoinositide Interacting 2	Protein Coding	39	GC07P005190	8.42
VCP	Valosin Containing Protein	Protein Coding	47	GC09M035056	8.24
UBQLN2	Ubiquilin 2	Protein Coding	41	GC0XP056563	8
SIRT1	Sirtuin 1	Protein Coding	47	GC10P067884	7.86
SH3GLB1	SH3 Domain Containing GRB2 Like, Endophilin B1	Protein Coding	39	GC01P086704	7.83
IRGM	Immunity Related GTPase M	Protein Coding	36	GC05P150846	7.73
WDFY3	WD Repeat And FYVE Domain Containing 3	Protein Coding	39	GC04M084669	7.72
PRKAA1	Protein Kinase AMP-Activated Catalytic Subunit Alpha 1	Protein Coding	45	GC05M040759	7.37
AKT1	AKT Serine/Threonine Kinase 1	Protein Coding	51	GC14M104769	7.2
VMP1	Vacuole Membrane Protein 1	Protein Coding	35	GC17P059707	7.18
CALCOCO2	Calcium Binding And Coiled-Coil Domain 2	Protein Coding	38	GC17P048830	7.12
FOXO3	Forkhead Box O3	Protein Coding	42	GC06P108559	6.82
UBQLN1	Ubiquilin 1	Protein Coding	41	GC09M083659	6.77
TP53INP2	Tumor Protein P53 Inducible Nuclear Protein 2	Protein Coding	33	GC20P034704	6.75
PRKN	Parkin RBR E3 Ubiquitin Protein Ligase	Protein Coding	37	GC06M161348	6.75
KEAP1	Kelch Like ECH Associated Protein 1	Protein Coding	46	GC19M010486	6.73
NFE2L2	Nuclear Factor, Erythroid 2 Like 2	Protein Coding	47	GC02M177227	6.6
CISD2	CDGSH Iron Sulfur Domain 2	Protein Coding	40	GC04P102868	6.52
BNIP3	BCL2 Interacting Protein 3	Protein Coding	40	GC10M131966	6.4
LRRK2	Leucine Rich Repeat Kinase 2	Protein Coding	48	GC12P040196	6.31
BECN2	Beclin 2	Protein Coding	21	GC01P241957	6.16
PRKAA2	Protein Kinase AMP-Activated Catalytic Subunit Alpha 2	Protein Coding	48	GC01P056645	6.13
DAPK1	Death Associated Protein Kinase 1	Protein Coding	47	GC09P087497	6.08
HDAC6	Histone Deacetylase 6	Protein Coding	50	GC0XP048801	5.86
PINK1	PTEN Induced Kinase 1	Protein Coding	45	GC01P020634	5.85
TARDBP	TAR DNA Binding Protein	Protein Coding	44	GC01P011013	5.85
TP53INP1	Tumor Protein P53 Inducible Nuclear Protein 1	Protein Coding	37	GC08M094925	5.79
GSK3B	Glycogen Synthase Kinase 3 Beta	Protein Coding	48	GC03M119821	5.77
SNCA	Synuclein Alpha	Protein Coding	47	GC04M089724	5.72
CASP3	Caspase 3	Protein Coding	48	GC04M184627	5.64
UBQLN4	Ubiquilin 4	Protein Coding	39	GC01M156033	5.63
GAA	Alpha Glucosidase	Protein Coding	45	GC17P080101	5.6
WDR45	WD Repeat Domain 45	Protein Coding	39	GC0XM049074	5.51
SMCR8	SMCR8-C9orf72 Complex Subunit	Protein Coding	29	GC17P032709	5.43
ULK3	Unc-51 Like Kinase 3	Protein Coding	38	GC15M074836	5.43
TECPR1	Tectonin Beta-Propeller Repeat Containing 1	Protein Coding	30	GC07M098214	5.42
MAPK8	Mitogen-Activated Protein Kinase 8	Protein Coding	48	GC10P048306	5.35
TBC1D5	TBC1 Domain Family Member 5	Protein Coding	36	GC03M017157	5.32
RPTOR	Regulatory Associated Protein Of MTOR Complex 1	Protein Coding	42	GC17P080544	5.32
MAPK14	Mitogen-Activated Protein Kinase 14	Protein Coding	50	GC06P064281	5.25
NOD2	Nucleotide Binding Oligomerization Domain Containing 2	Protein Coding	46	GC16P050693	5.21
FLNC	Filamin C	Protein Coding	43	GC07P128830	5.19
WDR41	WD Repeat Domain 41	Protein Coding	34	GC05M077425	5.17
FUS	FUS RNA Binding Protein	Protein Coding	43	GC16P031180	5.16
IL1B	Interleukin 1 Beta	Protein Coding	46	GC02M112829	5.13
SOD1	Superoxide Dismutase 1	Protein Coding	50	GC21P031659	5.1
TECPR2	Tectonin Beta-Propeller Repeat Containing 2	Protein Coding	33	GC14P102362	4.99
HIF1A	Hypoxia Inducible Factor 1 Subunit Alpha	Protein Coding	45	GC14P061695	4.95
STING1	Stimulator Of Interferon Response CGAMP Interactor 1	Protein Coding	32	GC05M139476	4.95
SIRT2	Sirtuin 2	Protein Coding	45	GC19M038878	4.93
TMEM59	Transmembrane Protein 59	Protein Coding	38	GC01M054031	4.93
RAB7A	RAB7A, Member RAS Oncogene Family	Protein Coding	46	GC03P132405	4.92
USP10	Ubiquitin Specific Peptidase 10	Protein Coding	43	GC16P084734	4.92
MTMR14	Myotubularin Related Protein 14	Protein Coding	42	GC03P009649	4.84
NRBF2	Nuclear Receptor Binding Factor 2	Protein Coding	35	GC10P063133	4.82
BCL2L1	BCL2 Like 1	Protein Coding	45	GC20M031664	4.8
PARK7	Parkinsonism Associated Deglycase	Protein Coding	44	GC01P008043	4.71
UBC	Ubiquitin C	Protein Coding	41	GC12M124911	4.7
TRIM5	Tripartite Motif Containing 5	Protein Coding	40	GC11M005905	4.7
HTT	Huntingtin	Protein Coding	41	GC04P003041	4.69
DAP	Death Associated Protein	Protein Coding	37	GC05M010679	4.67
HSP90AA1	Heat Shock Protein 90 Alpha Family Class A Member 1	Protein Coding	45	GC14M102080	4.67
MAPK1	Mitogen-Activated Protein Kinase 1	Protein Coding	50	GC22M021759	4.65
TNF	Tumor Necrosis Factor	Protein Coding	48	GC06P064135	4.62
RAB8A	RAB8A, Member RAS Oncogene Family	Protein Coding	38	GC19P016111	4.62
STX17	Syntaxin 17	Protein Coding	33	GC09P099906	4.58
STAT3	Signal Transducer And Activator Of Transcription 3	Protein Coding	50	GC17M042313	4.49
DAPK3	Death Associated Protein Kinase 3	Protein Coding	42	GC19M003958	4.48
FLCN	Folliculin	Protein Coding	40	GC17M017206	4.45
MCL1	MCL1 Apoptosis Regulator, BCL2 Family Member	Protein Coding	45	GC01M150561	4.44
TRIM21	Tripartite Motif Containing 21	Protein Coding	40	GC11M004384	4.41
RAB39B	RAB39B, Member RAS Oncogene Family	Protein Coding	37	GC0XM155259	4.39
HNRNPA1	Heterogeneous Nuclear Ribonucleoprotein A1	Protein Coding	44	GC12P054280	4.38
XBP1	X-Box Binding Protein 1	Protein Coding	44	GC22M028794	4.37
TMEM208	Transmembrane Protein 208	Protein Coding	29	GC16P067252	4.37
USP13	Ubiquitin Specific Peptidase 13	Protein Coding	43	GC03P179652	4.32
HSPA8	Heat Shock Protein Family A (Hsp70) Member 8	Protein Coding	45	GC11M123057	4.32
ZKSCAN3	Zinc Finger With KRAB And SCAN Domains 3	Protein Coding	32	GC06P028349	4.3
PTEN	Phosphatase And Tensin Homolog	Protein Coding	50	GC10P087863	4.28
ATXN3	Ataxin 3	Protein Coding	43	GC14M097712	4.27
BAX	BCL2 Associated X, Apoptosis Regulator	Protein Coding	47	GC19P048954	4.26
RAB5A	RAB5A, Member RAS Oncogene Family	Protein Coding	44	GC03P019963	4.26
LAMP1	Lysosomal Associated Membrane Protein 1	Protein Coding	40	GC13P113297	4.25
PARP1	Poly(ADP-Ribose) Polymerase 1	Protein Coding	47	GC01M226360	4.25
FOXO1	Forkhead Box O1	Protein Coding	46	GC13M040555	4.24
EGFR	Epidermal Growth Factor Receptor	Protein Coding	51	GC07P055019	4.24
KAT5	Lysine Acetyltransferase 5	Protein Coding	45	GC11P065711	4.2
PFN1	Profilin 1	Protein Coding	45	GC17M004945	4.19
IFNG	Interferon Gamma	Protein Coding	45	GC12M068154	4.19
STK11	Serine/Threonine Kinase 11	Protein Coding	47	GC19P001177	4.16
PPARGC1A	PPARG Coactivator 1 Alpha	Protein Coding	44	GC04M023755	4.16
PIK3CB	Phosphatidylinositol-4,5-Bisphosphate 3-Kinase Catalytic Subunit Beta	Protein Coding	47	GC03M138652	4.15
TUFM	Tu Translation Elongation Factor, Mitochondrial	Protein Coding	43	GC16M032642	4.13
CTSD	Cathepsin D	Protein Coding	49	GC11M001752	4.12
TRAF6	TNF Receptor Associated Factor 6	Protein Coding	45	GC11M036467	4.11
NUPR1	Nuclear Protein 1, Transcriptional Regulator	Protein Coding	34	GC16M028532	4.1
HSPA5	Heat Shock Protein Family A (Hsp70) Member 5	Protein Coding	45	GC09M125234	4.1
PIK3CA	Phosphatidylinositol-4,5-Bisphosphate 3-Kinase Catalytic Subunit Alpha	Protein Coding	51	GC03P179148	4.08
CHMP2B	Charged Multivesicular Body Protein 2B	Protein Coding	42	GC03P087227	4.06
PHB2	Prohibitin 2	Protein Coding	39	GC12M006965	4.06
TMEM74	Transmembrane Protein 74	Protein Coding	32	GC08M108606	4.05
MAPK15	Mitogen-Activated Protein Kinase 15	Protein Coding	39	GC08P143716	4.01
LGALS8	Galectin 8	Protein Coding	40	GC01P236518	4
ATP12A	ATPase H+/K+ Transporting Non-Gastric Alpha2 Subunit	Protein Coding	41	GC13P024680	4
CCDC115	Coiled-Coil Domain Containing 115	Protein Coding	34	GC02M132077	4
TMEM199	Transmembrane Protein 199	Protein Coding	33	GC17P033012	4
CASP8	Caspase 8	Protein Coding	50	GC02P201233	3.98
BRAF	B-Raf Proto-Oncogene, Serine/Threonine Kinase	Protein Coding	51	GC07M140724	3.98
RNASEL	Ribonuclease L	Protein Coding	44	GC01M182573	3.97
ATXN2	Ataxin 2	Protein Coding	41	GC12M111443	3.95
ATP13A2	ATPase Cation Transporting 13A2	Protein Coding	41	GC01M016985	3.94
LGALS3	Galectin 3	Protein Coding	43	GC14P055124	3.94
CDKN2A	Cyclin Dependent Kinase Inhibitor 2A	Protein Coding	49	GC09M021967	3.93
MEFV	MEFV Innate Immuity Regulator, Pyrin	Protein Coding	42	GC16M005056	3.93
MFN2	Mitofusin 2	Protein Coding	46	GC01P011980	3.91
BNIP3L	BCL2 Interacting Protein 3 Like	Protein Coding	40	GC08P026296	3.91
USP36	Ubiquitin Specific Peptidase 36	Protein Coding	37	GC17M078787	3.89
IL6	Interleukin 6	Protein Coding	47	GC07P022725	3.87
MATR3	Matrin 3	Protein Coding	41	GC05P139274	3.85
BAG3	BAG Cochaperone 3	Protein Coding	43	GC10P119651	3.84
KRAS	KRAS Proto-Oncogene, GTPase	Protein Coding	49	GC12M025204	3.81
PHF23	PHD Finger Protein 23	Protein Coding	31	GC17M007237	3.78
ATP4A	ATPase H+/K+ Transporting Subunit Alpha	Protein Coding	40	GC19M055010	3.77
FLVCR2	FLVCR Heme Transporter 2	Protein Coding	40	GC14P075578	3.77
SRPK3	SRSF Protein Kinase 3	Protein Coding	39	GC0XP153776	3.77
MALAT1	Metastasis Associated Lung Adenocarcinoma Transcript 1	RNA Gene	23	GC11P067480	3.77
ABL1	ABL Proto-Oncogene 1, Non-Receptor Tyrosine Kinase	Protein Coding	51	GC09P130713	3.76
RPS6KB1	Ribosomal Protein S6 Kinase B1	Protein Coding	47	GC17P059893	3.75
CTSB	Cathepsin B	Protein Coding	49	GC08M011842	3.73
TUBA4A	Tubulin Alpha 4a	Protein Coding	44	GC02M219249	3.73
MAPT	Microtubule Associated Protein Tau	Protein Coding	48	GC17P045894	3.72
HDAC10	Histone Deacetylase 10	Protein Coding	41	GC22M050245	3.72
GSK3A	Glycogen Synthase Kinase 3 Alpha	Protein Coding	47	GC19M053612	3.72
DCTN1	Dynactin Subunit 1	Protein Coding	45	GC02M074361	3.7
MYC	MYC Proto-Oncogene, BHLH Transcription Factor	Protein Coding	49	GC08P127735	3.7
DNM1L	Dynamin 1 Like	Protein Coding	45	GC12P032679	3.66
TRIM16	Tripartite Motif Containing 16	Protein Coding	32	GC17M015627	3.64
UNC45B	Unc-45 Myosin Chaperone B	Protein Coding	39	GC17P035148	3.63
SNAP29	Synaptosome Associated Protein 29	Protein Coding	41	GC22P020859	3.61
TGFB1	Transforming Growth Factor Beta 1	Protein Coding	49	GC19M041301	3.61
RAB33B	RAB33B, Member RAS Oncogene Family	Protein Coding	40	GC04P139453	3.61
FOXK1	Forkhead Box K1	Protein Coding	33	GC07P004682	3.59
CYCS	Cytochrome C, Somatic	Protein Coding	47	GC07M025118	3.56
IFI16	Interferon Gamma Inducible Protein 16	Protein Coding	41	GC01P158969	3.54
WDR45B	WD Repeat Domain 45B	Protein Coding	36	GC17M082614	3.54
EVA1A	Eva-1 Homolog A, Regulator Of Programmed Cell Death	Protein Coding	33	GC02M075469	3.54
VAMP8	Vesicle Associated Membrane Protein 8	Protein Coding	39	GC02P085561	3.53
BOK	BCL2 Family Apoptosis Regulator BOK	Protein Coding	38	GC02P241558	3.53
BAD	BCL2 Associated Agonist Of Cell Death	Protein Coding	44	GC11M077401	3.52
TMEM39A	Transmembrane Protein 39A	Protein Coding	32	GC03M119428	3.52
CCNF	Cyclin F	Protein Coding	40	GC16P002429	3.5
RIPK1	Receptor Interacting Serine/Threonine Kinase 1	Protein Coding	47	GC06P003090	3.49
IL23R	Interleukin 23 Receptor	Protein Coding	42	GC01P067138	3.49
ACBD5	Acyl-CoA Binding Domain Containing 5	Protein Coding	39	GC10M027182	3.46
IL10RA	Interleukin 10 Receptor Subunit Alpha	Protein Coding	43	GC11P117987	3.45
DAPK2	Death Associated Protein Kinase 2	Protein Coding	40	GC15M063907	3.44
BCL2L11	BCL2 Like 11	Protein Coding	43	GC02P111119	3.44
NFKB1	Nuclear Factor Kappa B Subunit 1	Protein Coding	50	GC04P102501	3.43
CXCR4	C-X-C Motif Chemokine Receptor 4	Protein Coding	50	GC02M136114	3.42
DIRAS3	DIRAS Family GTPase 3	Protein Coding	31	GC01M068045	3.41
MCOLN1	Mucolipin TRP Cation Channel 1	Protein Coding	43	GC19P007523	3.41
TIGAR	TP53 Induced Glycolysis Regulatory Phosphatase	Protein Coding	36	GC12P015310	3.4
PIK3R2	Phosphoinositide-3-Kinase Regulatory Subunit 2	Protein Coding	48	GC19P018153	3.4
RETREG1	Reticulophagy Regulator 1	Protein Coding	30	GC05M016472	3.38
NLRP3	NLR Family Pyrin Domain Containing 3	Protein Coding	45	GC01P247415	3.37
CHCHD10	Coiled-Coil-Helix-Coiled-Coil-Helix Domain Containing 10	Protein Coding	37	GC22M023765	3.37
FIG4	FIG4 Phosphoinositide 5-Phosphatase	Protein Coding	42	GC06P109691	3.33
RAB1A	RAB1A, Member RAS Oncogene Family	Protein Coding	40	GC02M065072	3.31
SH3BP4	SH3 Domain Binding Protein 4	Protein Coding	40	GC02P234951	3.31
WAC	WW Domain Containing Adaptor With Coiled-Coil	Protein Coding	39	GC10P028557	3.28
TBC1D17	TBC1 Domain Family Member 17	Protein Coding	33	GC19P049877	3.28
TREM2	Triggering Receptor Expressed On Myeloid Cells 2	Protein Coding	40	GC06M054380	3.27
NLRX1	NLR Family Member X1	Protein Coding	39	GC11P119166	3.26
LRSAM1	Leucine Rich Repeat And Sterile Alpha Motif Containing 1	Protein Coding	38	GC09P127451	3.26
EPHA4	EPH Receptor A4	Protein Coding	48	GC02M221418	3.24
CDKN1A	Cyclin Dependent Kinase Inhibitor 1A	Protein Coding	47	GC06P064289	3.24
BIRC5	Baculoviral IAP Repeat Containing 5	Protein Coding	44	GC17P078214	3.24
VAPB	VAMP Associated Protein B And C	Protein Coding	43	GC20P058389	3.23
TBC1D14	TBC1 Domain Family Member 14	Protein Coding	34	GC04P006910	3.23
LOC109504728	Chromosome 9 Open Reading Frame 72 Repeat Instability Region	Biological Region	2	GC09P027595	3.23
PICALM	Phosphatidylinositol Binding Clathrin Assembly Protein	Protein Coding	42	GC11M085957	3.22
TMEM150B	Transmembrane Protein 150B	Protein Coding	27	GC19M055308	3.21
TSC2	TSC Complex Subunit 2	Protein Coding	48	GC16P007428	3.21
RNF166	Ring Finger Protein 166	Protein Coding	36	GC16M088696	3.2
S100A8	S100 Calcium Binding Protein A8	Protein Coding	40	GC01M153391	3.19
EIF2AK4	Eukaryotic Translation Initiation Factor 2 Alpha Kinase 4	Protein Coding	43	GC15P039934	3.19
EIF2AK3	Eukaryotic Translation Initiation Factor 2 Alpha Kinase 3	Protein Coding	47	GC02M088556	3.17
PKM	Pyruvate Kinase M1/2	Protein Coding	43	GC15M072199	3.11
APP	Amyloid Beta Precursor Protein	Protein Coding	49	GC21M025880	3.1
CLN3	CLN3 Lysosomal/Endosomal Transmembrane Protein, Battenin	Protein Coding	43	GC16M028466	3.09
ACER2	Alkaline Ceramidase 2	Protein Coding	35	GC09P019408	3.09
DCN	Decorin	Protein Coding	44	GC12M091140	3.08
IGF1	Insulin Like Growth Factor 1	Protein Coding	47	GC12M102395	3.07
TAX1BP1	Tax1 Binding Protein 1	Protein Coding	39	GC07P027739	3.07
ANG	Angiogenin	Protein Coding	43	GC14P028102	3.07
ANXA11	Annexin A11	Protein Coding	43	GC10M080150	3.04
FOXK2	Forkhead Box K2	Protein Coding	36	GC17P082519	3.04
PSEN1	Presenilin 1	Protein Coding	50	GC14P073136	3.03
TRIM13	Tripartite Motif Containing 13	Protein Coding	35	GC13P049995	3.02
SRC	SRC Proto-Oncogene, Non-Receptor Tyrosine Kinase	Protein Coding	50	GC20P037344	3.02
BSN	Bassoon Presynaptic Cytomatrix Protein	Protein Coding	34	GC03P049554	3.01
TRIM23	Tripartite Motif Containing 23	Protein Coding	37	GC05M065589	3
FAS	Fas Cell Surface Death Receptor	Protein Coding	48	GC10P088969	2.99
FNBP1L	Formin Binding Protein 1 Like	Protein Coding	35	GC01P093448	2.98
CFLAR	CASP8 And FADD Like Apoptosis Regulator	Protein Coding	44	GC02P201117	2.97
LEP	Leptin	Protein Coding	45	GC07P128241	2.97
CASP1	Caspase 1	Protein Coding	48	GC11M105025	2.96
NEK1	NIMA Related Kinase 1	Protein Coding	42	GC04M169393	2.94
CAV1	Caveolin 1	Protein Coding	46	GC07P116524	2.94
ATF4	Activating Transcription Factor 4	Protein Coding	44	GC22P039575	2.94
APOE	Apolipoprotein E	Protein Coding	48	GC19P044906	2.93
RAB33A	RAB33A, Member RAS Oncogene Family	Protein Coding	36	GC0XP130110	2.93
TOLLIP	Toll Interacting Protein	Protein Coding	41	GC11M001274	2.93
BNIP1	BCL2 Interacting Protein 1	Protein Coding	33	GC05P173144	2.92
RAB23	RAB23, Member RAS Oncogene Family	Protein Coding	41	GC06M057187	2.92
BAK1	BCL2 Antagonist/Killer 1	Protein Coding	43	GC06M033572	2.91
HTRA2	HtrA Serine Peptidase 2	Protein Coding	44	GC02P074529	2.9
SUPT20H	SPT20 Homolog, SAGA Complex Component	Protein Coding	35	GC13M037009	2.9
PIK3CG	Phosphatidylinositol-4,5-Bisphosphate 3-Kinase Catalytic Subunit Gamma	Protein Coding	47	GC07P106865	2.9
VDAC1	Voltage Dependent Anion Channel 1	Protein Coding	44	GC05M133975	2.89
RNF185	Ring Finger Protein 185	Protein Coding	36	GC22P031160	2.89
AIFM1	Apoptosis Inducing Factor Mitochondria Associated 1	Protein Coding	47	GC0XM130129	2.89
CASP9	Caspase 9	Protein Coding	46	GC01M015491	2.88
WASHC1	WASH Complex Subunit 1	Protein Coding	22	GC09M000016	2.88
HSPB1	Heat Shock Protein Family B (Small) Member 1	Protein Coding	50	GC07P076302	2.87
RAB12	RAB12, Member RAS Oncogene Family	Protein Coding	33	GC18P008600	2.86
MLST8	MTOR Associated Protein, LST8 Homolog	Protein Coding	40	GC16P002204	2.84
TRAPPC8	Trafficking Protein Particle Complex Subunit 8	Protein Coding	32	GC18M031829	2.84
NEFH	Neurofilament Heavy Chain	Protein Coding	44	GC22P029480	2.84
GLE1	GLE1 RNA Export Mediator	Protein Coding	39	GC09P128504	2.84
UNC13A	Unc-13 Homolog A	Protein Coding	39	GC19M017603	2.84
FNIP1	Folliculin Interacting Protein 1	Protein Coding	35	GC05M131641	2.84
CLEC16A	C-Type Lectin Domain Containing 16A	Protein Coding	36	GC16P010944	2.82
TLR4	Toll Like Receptor 4	Protein Coding	49	GC09P117704	2.81
LMNA	Lamin A/C	Protein Coding	46	GC01P156082	2.8
ACE2	Angiotensin Converting Enzyme 2	Protein Coding	47	GC0XM015494	2.8
S100A9	S100 Calcium Binding Protein A9	Protein Coding	40	GC01P153357	2.8
MDM2	MDM2 Proto-Oncogene	Protein Coding	51	GC12P068808	2.8
XIAP	X-Linked Inhibitor Of Apoptosis	Protein Coding	47	GC0XP123859	2.76
TNFSF10	TNF Superfamily Member 10	Protein Coding	44	GC03M172505	2.76
TRAPPC4	Trafficking Protein Particle Complex Subunit 4	Protein Coding	39	GC11P119018	2.75
BBC3	BCL2 Binding Component 3	Protein Coding	39	GC19M047220	2.75
HRAS	HRas Proto-Oncogene, GTPase	Protein Coding	50	GC11M001778	2.75
ERN1	Endoplasmic Reticulum To Nucleus Signaling 1	Protein Coding	44	GC17M064039	2.74
RIPK2	Receptor Interacting Serine/Threonine Kinase 2	Protein Coding	44	GC08P089760	2.73
WDR6	WD Repeat Domain 6	Protein Coding	34	GC03P049007	2.73
CD44	CD44 Molecule (Indian Blood Group)	Protein Coding	45	GC11P035139	2.72
MIR155	MicroRNA 155	RNA Gene	18	GC21P025573	2.72
PIM2	Pim-2 Proto-Oncogene, Serine/Threonine Kinase	Protein Coding	43	GC0XM048913	2.71
PRKAB1	Protein Kinase AMP-Activated Non-Catalytic Subunit Beta 1	Protein Coding	45	GC12P119632	2.71
RB1	RB Transcriptional Corepressor 1	Protein Coding	46	GC13P048303	2.71
ATM	ATM Serine/Threonine Kinase	Protein Coding	51	GC11P108222	2.7
NLRP1	NLR Family Pyrin Domain Containing 1	Protein Coding	43	GC17M005499	2.69
MCOLN3	Mucolipin TRP Cation Channel 3	Protein Coding	37	GC01M085019	2.69
YWHAZ	Tyrosine 3-Monooxygenase/Tryptophan 5-Monooxygenase Activation Protein Zeta	Protein Coding	45	GC08M100917	2.69
HK2	Hexokinase 2	Protein Coding	45	GC02P074833	2.67
IKBKB	Inhibitor Of Nuclear Factor Kappa B Kinase Subunit Beta	Protein Coding	51	GC08P042271	2.67
CPTP	Ceramide-1-Phosphate Transfer Protein	Protein Coding	27	GC01P002715	2.67
MTMR8	Myotubularin Related Protein 8	Protein Coding	33	GC0XM064268	2.65
ITGB4	Integrin Subunit Beta 4	Protein Coding	46	GC17P075721	2.65
JUN	Jun Proto-Oncogene, AP-1 Transcription Factor Subunit	Protein Coding	47	GC01M058780	2.64
RAF1	Raf-1 Proto-Oncogene, Serine/Threonine Kinase	Protein Coding	52	GC03M012583	2.64
PTPN22	Protein Tyrosine Phosphatase Non-Receptor Type 22	Protein Coding	46	GC01M113813	2.62
RAB39A	RAB39A, Member RAS Oncogene Family	Protein Coding	31	GC11P107928	2.62
RAB1B	RAB1B, Member RAS Oncogene Family	Protein Coding	40	GC11P067566	2.61
FNIP2	Folliculin Interacting Protein 2	Protein Coding	35	GC04P158769	2.61
MIR30A	MicroRNA 30a	RNA Gene	20	GC06M071403	2.61
DAO	D-Amino Acid Oxidase	Protein Coding	43	GC12P108859	2.6
VPS13A	Vacuolar Protein Sorting 13 Homolog A	Protein Coding	39	GC09P077177	2.6
TM9SF1	Transmembrane 9 Superfamily Member 1	Protein Coding	32	GC14M024189	2.6
EIF4EBP1	Eukaryotic Translation Initiation Factor 4E Binding Protein 1	Protein Coding	44	GC08P038200	2.59
CTNNB1	Catenin Beta 1	Protein Coding	51	GC03P041236	2.59
TNFAIP3	TNF Alpha Induced Protein 3	Protein Coding	46	GC06P137866	2.58
STK4	Serine/Threonine Kinase 4	Protein Coding	47	GC20P044966	2.58
DENND3	DENN Domain Containing 3	Protein Coding	36	GC08P141117	2.58
RELA	RELA Proto-Oncogene, NF-KB Subunit	Protein Coding	49	GC11M065653	2.57
CLTC	Clathrin Heavy Chain	Protein Coding	44	GC17P059619	2.57
CEBPB	CCAAT Enhancer Binding Protein Beta	Protein Coding	42	GC20P050190	2.56
CD5L	CD5 Molecule Like	Protein Coding	36	GC01M157800	2.56
BID	BH3 Interacting Domain Death Agonist	Protein Coding	43	GC22M017734	2.55
ITPR1	Inositol 1,4,5-Trisphosphate Receptor Type 1	Protein Coding	47	GC03P004486	2.55
STUB1	STIP1 Homology And U-Box Containing Protein 1	Protein Coding	43	GC16P007366	2.54
SIRT6	Sirtuin 6	Protein Coding	44	GC19M004174	2.54
TLK2	Tousled Like Kinase 2	Protein Coding	44	GC17P062458	2.54
RASIP1	Ras Interacting Protein 1	Protein Coding	36	GC19M048720	2.54
DHRSX	Dehydrogenase/Reductase X-Linked	Protein Coding	31	GC0XM002219	2.54
KIF25	Kinesin Family Member 25	Protein Coding	28	GC06P167996	2.54
CASP7	Caspase 7	Protein Coding	48	GC10P113679	2.53
PMAIP1	Phorbol-12-Myristate-13-Acetate-Induced Protein 1	Protein Coding	38	GC18P059899	2.53
TIA1	TIA1 Cytotoxic Granule Associated RNA Binding Protein	Protein Coding	42	GC02M070209	2.53
CDK5	Cyclin Dependent Kinase 5	Protein Coding	51	GC07M151053	2.52
MTMR9	Myotubularin Related Protein 9	Protein Coding	37	GC08P011284	2.51
HSF1	Heat Shock Transcription Factor 1	Protein Coding	43	GC08P144291	2.51
SGPP1	Sphingosine-1-Phosphate Phosphatase 1	Protein Coding	38	GC14M063684	2.49
RAB18	RAB18, Member RAS Oncogene Family	Protein Coding	39	GC10P027504	2.49
NOD1	Nucleotide Binding Oligomerization Domain Containing 1	Protein Coding	43	GC07M030424	2.47
YWHAE	Tyrosine 3-Monooxygenase/Tryptophan 5-Monooxygenase Activation Protein Epsilon	Protein Coding	47	GC17M001346	2.47
DDIT3	DNA Damage Inducible Transcript 3	Protein Coding	43	GC12M057516	2.47
FADD	Fas Associated Via Death Domain	Protein Coding	45	GC11P070203	2.46
RNF41	Ring Finger Protein 41	Protein Coding	39	GC12M056202	2.46
HMOX1	Heme Oxygenase 1	Protein Coding	50	GC22P035380	2.45
CFAP410	Cilia And Flagella Associated Protein 410	Protein Coding	28	GC21M044330	2.45
MMP14	Matrix Metallopeptidase 14	Protein Coding	49	GC14P028293	2.45
PDCD6IP	Programmed Cell Death 6 Interacting Protein	Protein Coding	41	GC03P033798	2.44
SYT11	Synaptotagmin 11	Protein Coding	40	GC01P155829	2.43
SYNPO2	Synaptopodin 2	Protein Coding	34	GC04P118850	2.43
IL17A	Interleukin 17A	Protein Coding	40	GC06P052186	2.42
GAPDH	Glyceraldehyde-3-Phosphate Dehydrogenase	Protein Coding	46	GC12P015352	2.42
TNFRSF10B	TNF Receptor Superfamily Member 10b	Protein Coding	48	GC08M023020	2.41
UCHL1	Ubiquitin C-Terminal Hydrolase L1	Protein Coding	49	GC04P041256	2.41
YY1	YY1 Transcription Factor	Protein Coding	46	GC14P100238	2.41
TMEM41B	Transmembrane Protein 41B	Protein Coding	31	GC11M009280	2.41
GFAP	Glial Fibrillary Acidic Protein	Protein Coding	45	GC17M044905	2.41
PAWR	Pro-Apoptotic WT1 Regulator	Protein Coding	40	GC12M079574	2.4
MIR34A	MicroRNA 34a	RNA Gene	22	GC01M009151	2.4
NPRL2	NPR2 Like, GATOR1 Complex Subunit	Protein Coding	38	GC03M050556	2.39
IFNB1	Interferon Beta 1	Protein Coding	39	GC09M021077	2.39
INS	Insulin	Protein Coding	45	GC11M002159	2.39
E2F1	E2F Transcription Factor 1	Protein Coding	42	GC20M033675	2.38
ERBB4	Erb-B2 Receptor Tyrosine Kinase 4	Protein Coding	52	GC02M211375	2.38
PON1	Paraoxonase 1	Protein Coding	44	GC07M095297	2.38
PON3	Paraoxonase 3	Protein Coding	43	GC07M095359	2.38
PRPH	Peripherin	Protein Coding	43	GC12P049293	2.38
PON2	Paraoxonase 2	Protein Coding	41	GC07M095404	2.38
TAF15	TATA-Box Binding Protein Associated Factor 15	Protein Coding	41	GC17P035713	2.38
GLT8D1	Glycosyltransferase 8 Domain Containing 1	Protein Coding	36	GC03M052694	2.38
RNASE4	Ribonuclease A Family Member 4	Protein Coding	33	GC14P028103	2.38
ALS3	Amyotrophic Lateral Sclerosis 3 (Autosomal Dominant)	Genetic Locus	2	GC18U990005	2.38
ALS7	Amyotrophic Lateral Sclerosis 7	Genetic Locus	2	GC20U900157	2.38
LOC108903148	10p13 OPTN Distal Alu-Mediated Recombination Region	Biological Region	2	GC10P013108	2.38
IRF3	Interferon Regulatory Factor 3	Protein Coding	44	GC19M049659	2.37
MIR21	MicroRNA 21	RNA Gene	23	GC17P059841	2.37
RAB24	RAB24, Member RAS Oncogene Family	Protein Coding	35	GC05M177301	2.36
CDKN1B	Cyclin Dependent Kinase Inhibitor 1B	Protein Coding	45	GC12P015588	2.35
BIK	BCL2 Interacting Killer	Protein Coding	39	GC22P043110	2.35
BECN1P2	Beclin 1 Pseudogene 2	Pseudogene	4	GC06P071075	2.35
YWHAB	Tyrosine 3-Monooxygenase/Tryptophan 5-Monooxygenase Activation Protein Beta	Protein Coding	46	GC20P044885	2.34
LRRC25	Leucine Rich Repeat Containing 25	Protein Coding	31	GC19M018393	2.34
SMAD4	SMAD Family Member 4	Protein Coding	48	GC18P051028	2.34
ITGB1	Integrin Subunit Beta 1	Protein Coding	48	GC10M032909	2.34
PIK3C2A	Phosphatidylinositol-4-Phosphate 3-Kinase Catalytic Subunit Type 2 Alpha	Protein Coding	45	GC11M017383	2.34
SMAD3	SMAD Family Member 3	Protein Coding	47	GC15P067063	2.33
RAB35	RAB35, Member RAS Oncogene Family	Protein Coding	39	GC12M120096	2.33
ATF6	Activating Transcription Factor 6	Protein Coding	45	GC01P161766	2.33
HSP90B1	Heat Shock Protein 90 Beta Family Member 1	Protein Coding	44	GC12P103930	2.33
NEDD4	NEDD4 E3 Ubiquitin Protein Ligase	Protein Coding	45	GC15M055826	2.32
SESN2	Sestrin 2	Protein Coding	37	GC01P028270	2.32
MAP1LC3B2	Microtubule Associated Protein 1 Light Chain 3 Beta 2	Protein Coding	30	GC12P116559	2.32
BIRC2	Baculoviral IAP Repeat Containing 2	Protein Coding	44	GC11P102347	2.32
RPS27A	Ribosomal Protein S27a	Protein Coding	41	GC02P055231	2.31
ABCE1	ATP Binding Cassette Subfamily E Member 1	Protein Coding	38	GC04P145097	2.31
GRAMD1A	GRAM Domain Containing 1A	Protein Coding	32	GC19P043491	2.31
PIK3R1	Phosphoinositide-3-Kinase Regulatory Subunit 1	Protein Coding	49	GC05P068215	2.31
DNM2	Dynamin 2	Protein Coding	48	GC19P010718	2.31
DEPDC5	DEP Domain Containing 5, GATOR1 Subcomplex Subunit	Protein Coding	38	GC22P031753	2.31
TRAF2	TNF Receptor Associated Factor 2	Protein Coding	43	GC09P136881	2.31
VPS39	VPS39 Subunit Of HOPS Complex	Protein Coding	37	GC15M042159	2.3
HOTAIR	HOX Transcript Antisense RNA	RNA Gene	25	GC12M053962	2.3
INSR	Insulin Receptor	Protein Coding	51	GC19M007112	2.29
EIF2S1	Eukaryotic Translation Initiation Factor 2 Subunit Alpha	Protein Coding	43	GC14P067359	2.28
YAP1	Yes1 Associated Transcriptional Regulator	Protein Coding	46	GC11P102110	2.28
ARG2	Arginase 2	Protein Coding	43	GC14P067619	2.27
RAB21	RAB21, Member RAS Oncogene Family	Protein Coding	35	GC12P071754	2.27
MTDH	Metadherin	Protein Coding	39	GC08P097643	2.27
TMBIM6	Transmembrane BAX Inhibitor Motif Containing 6	Protein Coding	35	GC12P049707	2.26
MET	MET Proto-Oncogene, Receptor Tyrosine Kinase	Protein Coding	51	GC07P116672	2.26
ITGB3	Integrin Subunit Beta 3	Protein Coding	48	GC17P047709	2.26
S100A4	S100 Calcium Binding Protein A4	Protein Coding	42	GC01M153543	2.26
MIR142	MicroRNA 142	RNA Gene	20	GC17M058331	2.25
TFRC	Transferrin Receptor	Protein Coding	46	GC03M196027	2.25
EIF4G2	Eukaryotic Translation Initiation Factor 4 Gamma 2	Protein Coding	41	GC11M010916	2.24
MTMR3	Myotubularin Related Protein 3	Protein Coding	41	GC22P029892	2.24
BCAS3	BCAS3 Microtubule Associated Cell Migration Factor	Protein Coding	35	GC17P060678	2.24
AR	Androgen Receptor	Protein Coding	51	GC0XP067544	2.23
TSC1	TSC Complex Subunit 1	Protein Coding	45	GC09M132891	2.21
VEGFA	Vascular Endothelial Growth Factor A	Protein Coding	46	GC06P043770	2.2
YWHAQ	Tyrosine 3-Monooxygenase/Tryptophan 5-Monooxygenase Activation Protein Theta	Protein Coding	45	GC02M009583	2.19
TRIM50	Tripartite Motif Containing 50	Protein Coding	31	GC07M073312	2.19
RIPK3	Receptor Interacting Serine/Threonine Kinase 3	Protein Coding	41	GC14M024336	2.18
BIRC6	Baculoviral IAP Repeat Containing 6	Protein Coding	40	GC02P032405	2.18
CAMKK2	Calcium/Calmodulin Dependent Protein Kinase Kinase 2	Protein Coding	45	GC12M121782	2.18
PDCD4	Programmed Cell Death 4	Protein Coding	40	GC10P110871	2.17
PRKDC	Protein Kinase, DNA-Activated, Catalytic Subunit	Protein Coding	48	GC08M047773	2.17
RACK1	Receptor For Activated C Kinase 1	Protein Coding	35	GC05M181511	2.17
AGER	Advanced Glycosylation End-Product Specific Receptor	Protein Coding	43	GC06M032180	2.17
MAP1S	Microtubule Associated Protein 1S	Protein Coding	34	GC19P030300	2.16
RAB8B	RAB8B, Member RAS Oncogene Family	Protein Coding	39	GC15P086908	2.16
MAPK9	Mitogen-Activated Protein Kinase 9	Protein Coding	46	GC05M180240	2.16
OPA1	OPA1 Mitochondrial Dynamin Like GTPase	Protein Coding	43	GC03P193594	2.15
CD40LG	CD40 Ligand	Protein Coding	45	GC0XP136649	2.15
SPTAN1	Spectrin Alpha, Non-Erythrocytic 1	Protein Coding	46	GC09P128552	2.14
NAMPT	Nicotinamide Phosphoribosyltransferase	Protein Coding	45	GC07M106248	2.13
OFD1	OFD1 Centriole And Centriolar Satellite Protein	Protein Coding	41	GC0XP013734	2.13
TNFRSF1A	TNF Receptor Superfamily Member 1A	Protein Coding	47	GC12M006328	2.13
CXCL8	C-X-C Motif Chemokine Ligand 8	Protein Coding	39	GC04P073740	2.13
PLEKHM2	Pleckstrin Homology And RUN Domain Containing M2	Protein Coding	33	GC01P015724	2.12
SIGMAR1	Sigma Non-Opioid Intracellular Receptor 1	Protein Coding	45	GC09M034634	2.12
IRF1	Interferon Regulatory Factor 1	Protein Coding	45	GC05M132440	2.12
MIR20A	MicroRNA 20a	RNA Gene	19	GC13P091495	2.12
EPHB2	EPH Receptor B2	Protein Coding	49	GC01P022710	2.11
HSPA4	Heat Shock Protein Family A (Hsp70) Member 4	Protein Coding	40	GC05P133051	2.11
NPC1	NPC Intracellular Cholesterol Transporter 1	Protein Coding	45	GC18M023506	2.11
TLR2	Toll Like Receptor 2	Protein Coding	49	GC04P153684	2.09
ISG15	ISG15 Ubiquitin Like Modifier	Protein Coding	44	GC01P001001	2.09
EEF2K	Eukaryotic Elongation Factor 2 Kinase	Protein Coding	44	GC16P022217	2.09
COPB1	COPI Coat Complex Subunit Beta 1	Protein Coding	37	GC11M014436	2.09
GBA	Glucosylceramidase Beta	Protein Coding	45	GC01M155234	2.08
TGM2	Transglutaminase 2	Protein Coding	45	GC20M038127	2.08
GPR137B	G Protein-Coupled Receptor 137B	Protein Coding	35	GC01P236142	2.08
GPR137	G Protein-Coupled Receptor 137	Protein Coding	32	GC11P064270	2.08
CTSL	Cathepsin L	Protein Coding	44	GC09P087725	2.08
AURKA	Aurora Kinase A	Protein Coding	49	GC20M056370	2.08
MAPK3	Mitogen-Activated Protein Kinase 3	Protein Coding	47	GC16M032843	2.08
FBXW7	F-Box And WD Repeat Domain Containing 7	Protein Coding	43	GC04M152321	2.08
ERBB2	Erb-B2 Receptor Tyrosine Kinase 2	Protein Coding	52	GC17P039687	2.08
TANK	TRAF Family Member Associated NFKB Activator	Protein Coding	41	GC02P161136	2.07
BMF	Bcl2 Modifying Factor	Protein Coding	37	GC15M040087	2.07
VPS18	VPS18 Core Subunit Of CORVET And HOPS Complexes	Protein Coding	34	GC15P040894	2.07
OLR1	Oxidized Low Density Lipoprotein Receptor 1	Protein Coding	41	GC12M017572	2.07
APAF1	Apoptotic Peptidase Activating Factor 1	Protein Coding	45	GC12P098645	2.07
ATP2A2	ATPase Sarcoplasmic/Endoplasmic Reticulum Ca2+ Transporting 2	Protein Coding	50	GC12P110280	2.07
CRY1	Cryptochrome Circadian Regulator 1	Protein Coding	42	GC12M106991	2.07
HDAC1	Histone Deacetylase 1	Protein Coding	47	GC01P032292	2.07
NR4A1	Nuclear Receptor Subfamily 4 Group A Member 1	Protein Coding	45	GC12P052022	2.07
SCOC	Short Coiled-Coil Protein	Protein Coding	35	GC04P140257	2.06
BCAP31	B Cell Receptor Associated Protein 31	Protein Coding	39	GC0XM153701	2.06
RAB26	RAB26, Member RAS Oncogene Family	Protein Coding	37	GC16P007434	2.06
USP14	Ubiquitin Specific Peptidase 14	Protein Coding	44	GC18P000158	2.05
IGF1R	Insulin Like Growth Factor 1 Receptor	Protein Coding	52	GC15P098648	2.05
DCP2	Decapping MRNA 2	Protein Coding	36	GC05P112976	2.04
PPP2CA	Protein Phosphatase 2 Catalytic Subunit Alpha	Protein Coding	47	GC05M134194	2.04
ANXA5	Annexin A5	Protein Coding	44	GC04M121667	2.02
STX5	Syntaxin 5	Protein Coding	38	GC11M062806	2.02
ROCK1	Rho Associated Coiled-Coil Containing Protein Kinase 1	Protein Coding	48	GC18M020946	2.02
LMNB1	Lamin B1	Protein Coding	46	GC05P126776	2.01
GOLGA2	Golgin A2	Protein Coding	40	GC09M128255	2.01
STK3	Serine/Threonine Kinase 3	Protein Coding	44	GC08M098372	2.01
DAXX	Death Domain Associated Protein	Protein Coding	42	GC06M033318	2.01
IL10	Interleukin 10	Protein Coding	45	GC01M206767	2.01
TRIM22	Tripartite Motif Containing 22	Protein Coding	38	GC11P005689	2.01
RAB11A	RAB11A, Member RAS Oncogene Family	Protein Coding	45	GC15P082231	2
MYCBP2	MYC Binding Protein 2	Protein Coding	37	GC13M077044	2
PIP4K2A	Phosphatidylinositol-5-Phosphate 4-Kinase Type 2 Alpha	Protein Coding	43	GC10M022484	1.99
AKT1S1	AKT1 Substrate 1	Protein Coding	38	GC19M049869	1.99
IL6R	Interleukin 6 Receptor	Protein Coding	47	GC01P154405	1.99
CUL3	Cullin 3	Protein Coding	45	GC02M224470	1.98
RBX1	Ring-Box 1	Protein Coding	41	GC22P040951	1.98
CLU	Clusterin	Protein Coding	44	GC08M027596	1.98
DNAJA3	DnaJ Heat Shock Protein Family (Hsp40) Member A3	Protein Coding	39	GC16P004425	1.98
MIR22	MicroRNA 22	RNA Gene	20	GC17M001713	1.98
PEA15	Proliferation And Apoptosis Adaptor Protein 15	Protein Coding	41	GC01P160205	1.97
TTR	Transthyretin	Protein Coding	47	GC18P031557	1.97
SBF2	SET Binding Factor 2	Protein Coding	38	GC11M009792	1.97
IKBKE	Inhibitor Of Nuclear Factor Kappa B Kinase Subunit Epsilon	Protein Coding	44	GC01P206470	1.97
FBP1	Fructose-Bisphosphatase 1	Protein Coding	47	GC09M094603	1.96
RAB38	RAB38, Member RAS Oncogene Family	Protein Coding	39	GC11M087809	1.96
MEG3	Maternally Expressed 3	RNA Gene	29	GC14P107710	1.96
YWHAH	Tyrosine 3-Monooxygenase/Tryptophan 5-Monooxygenase Activation Protein Eta	Protein Coding	45	GC22P031944	1.96
TXN	Thioredoxin	Protein Coding	44	GC09M110243	1.95
VPS51	VPS51 Subunit Of GARP Complex	Protein Coding	35	GC11P065089	1.95
FUNDC1	FUN14 Domain Containing 1	Protein Coding	33	GC0XM044523	1.95
MIR30D	MicroRNA 30d	RNA Gene	17	GC08M134804	1.95
VPS29	VPS29 Retromer Complex Component	Protein Coding	40	GC12M110491	1.94
EPHA3	EPH Receptor A3	Protein Coding	44	GC03P089077	1.94
PHAF1	Phagosome Assembly Factor 1	Protein Coding	24	GC16P067110	1.94
MAPK10	Mitogen-Activated Protein Kinase 10	Protein Coding	49	GC04M085990	1.94
TAB2	TGF-Beta Activated Kinase 1 (MAP3K7) Binding Protein 2	Protein Coding	45	GC06P149218	1.94
ZC3H12A	Zinc Finger CCCH-Type Containing 12A	Protein Coding	35	GC01P037474	1.93
MIR199A1	MicroRNA 199a-1	RNA Gene	18	GC19M010817	1.93
AKT2	AKT Serine/Threonine Kinase 2	Protein Coding	52	GC19M040230	1.93
ZFYVE1	Zinc Finger FYVE-Type Containing 1	Protein Coding	36	GC14M072969	1.92
PSMC4	Proteasome 26S Subunit, ATPase 4	Protein Coding	39	GC19P043672	1.92
VPS33A	VPS33A Core Subunit Of CORVET And HOPS Complexes	Protein Coding	39	GC12M122229	1.91
MAP3K5	Mitogen-Activated Protein Kinase Kinase Kinase 5	Protein Coding	45	GC06M136557	1.91
MIR101-1	MicroRNA 101-1	RNA Gene	18	GC01M065058	1.91
HMGA1	High Mobility Group AT-Hook 1	Protein Coding	45	GC06P064246	1.9
SPARC	Secreted Protein Acidic And Cysteine Rich	Protein Coding	48	GC05M151661	1.9
NDRG1	N-Myc Downstream Regulated 1	Protein Coding	43	GC08M133237	1.9
NOTCH1	Notch Receptor 1	Protein Coding	49	GC09M136957	1.89
PRNP	Prion Protein	Protein Coding	44	GC20P004686	1.89
CHUK	Component Of Inhibitor Of Nuclear Factor Kappa B Kinase Complex	Protein Coding	50	GC10M100188	1.89
MAP3K7	Mitogen-Activated Protein Kinase Kinase Kinase 7	Protein Coding	50	GC06M090513	1.89
LRPPRC	Leucine Rich Pentatricopeptide Repeat Containing	Protein Coding	41	GC02M043850	1.89
EP300	E1A Binding Protein P300	Protein Coding	49	GC22P041091	1.88
SEC16A	SEC16 Homolog A, Endoplasmic Reticulum Export Factor	Protein Coding	35	GC09M136440	1.88
MAP1B	Microtubule Associated Protein 1B	Protein Coding	43	GC05P072107	1.88
CHEK1	Checkpoint Kinase 1	Protein Coding	48	GC11P125625	1.88
BCL2L2	BCL2 Like 2	Protein Coding	42	GC14P028371	1.88
DEPTOR	DEP Domain Containing MTOR Interacting Protein	Protein Coding	38	GC08P119873	1.88
ARFIP2	ADP Ribosylation Factor Interacting Protein 2	Protein Coding	38	GC11M006476	1.88
FBXL2	F-Box And Leucine Rich Repeat Protein 2	Protein Coding	34	GC03P033277	1.88
MIR17	MicroRNA 17	RNA Gene	21	GC13P091350	1.87
TLR3	Toll Like Receptor 3	Protein Coding	50	GC04P186059	1.87
NSF	N-Ethylmaleimide Sensitive Factor, Vesicle Fusing ATPase	Protein Coding	43	GC17P046590	1.87
IL4	Interleukin 4	Protein Coding	43	GC05P132673	1.87
STRIP1	Striatin Interacting Protein 1	Protein Coding	32	GC01P110032	1.87
ESR2	Estrogen Receptor 2	Protein Coding	47	GC14M064084	1.86
TRADD	TNFRSF1A Associated Via Death Domain	Protein Coding	41	GC16M067154	1.86
VPS35	VPS35 Retromer Complex Component	Protein Coding	42	GC16M046829	1.86
TP53BP2	Tumor Protein P53 Binding Protein 2	Protein Coding	41	GC01M223779	1.86
MIR204	MicroRNA 204	RNA Gene	21	GC09M070809	1.85
WWOX	WW Domain Containing Oxidoreductase	Protein Coding	45	GC16P078099	1.85
SPP1	Secreted Phosphoprotein 1	Protein Coding	44	GC04P087975	1.84
RAB9A	RAB9A, Member RAS Oncogene Family	Protein Coding	38	GC0XP013707	1.84
PVT1	Pvt1 Oncogene	RNA Gene	24	GC08P127837	1.84
MAP2K1	Mitogen-Activated Protein Kinase Kinase 1	Protein Coding	52	GC15P066386	1.84
AVEN	Apoptosis And Caspase Activation Inhibitor	Protein Coding	35	GC15M033853	1.84
DDX6	DEAD-Box Helicase 6	Protein Coding	44	GC11M118748	1.83
FBXO7	F-Box Protein 7	Protein Coding	41	GC22P032474	1.83
IL24	Interleukin 24	Protein Coding	40	GC01P206897	1.83
TLR9	Toll Like Receptor 9	Protein Coding	43	GC03M052222	1.82
TRIM17	Tripartite Motif Containing 17	Protein Coding	36	GC01M228407	1.82
RAB6B	RAB6B, Member RAS Oncogene Family	Protein Coding	39	GC03M133824	1.82
NAPA	NSF Attachment Protein Alpha	Protein Coding	36	GC19M054015	1.82
IFNL2	Interferon Lambda 2	Protein Coding	34	GC19P039268	1.82
MLKL	Mixed Lineage Kinase Domain Like Pseudokinase	Protein Coding	40	GC16M074672	1.82
PPP1CA	Protein Phosphatase 1 Catalytic Subunit Alpha	Protein Coding	46	GC11M077617	1.81
ELAVL1	ELAV Like RNA Binding Protein 1	Protein Coding	40	GC19M007958	1.81
ING1	Inhibitor Of Growth Family Member 1	Protein Coding	41	GC13P110712	1.81
MIR224	MicroRNA 224	RNA Gene	17	GC0XM151958	1.8
CAPNS1	Calpain Small Subunit 1	Protein Coding	40	GC19P043538	1.8
PRODH	Proline Dehydrogenase 1	Protein Coding	44	GC22M018912	1.8
RMC1	Regulator Of MON1-CCZ1	Protein Coding	24	GC18P023504	1.8
RAB4A	RAB4A, Member RAS Oncogene Family	Protein Coding	40	GC01P229271	1.79
RAB2A	RAB2A, Member RAS Oncogene Family	Protein Coding	41	GC08P060516	1.79
STBD1	Starch Binding Domain 1	Protein Coding	34	GC04P076306	1.78
MT2A	Metallothionein 2A	Protein Coding	41	GC16P056828	1.78
EIF5	Eukaryotic Translation Initiation Factor 5	Protein Coding	40	GC14P103333	1.78
RRAGB	Ras Related GTP Binding B	Protein Coding	37	GC0XP055717	1.78
KLHL22	Kelch Like Family Member 22	Protein Coding	36	GC22M020442	1.77
PLK1	Polo Like Kinase 1	Protein Coding	48	GC16P024042	1.77
IAPP	Islet Amyloid Polypeptide	Protein Coding	40	GC12P021354	1.77
VPS16	VPS16 Core Subunit Of CORVET And HOPS Complexes	Protein Coding	35	GC20P002840	1.77
HAX1	HCLS1 Associated Protein X-1	Protein Coding	41	GC01P154273	1.77
PPARA	Peroxisome Proliferator Activated Receptor Alpha	Protein Coding	44	GC22P046150	1.77
TLR7	Toll Like Receptor 7	Protein Coding	45	GC0XP012867	1.76
VPS41	VPS41 Subunit Of HOPS Complex	Protein Coding	37	GC07M038886	1.76
UBE2D3	Ubiquitin Conjugating Enzyme E2 D3	Protein Coding	44	GC04M102794	1.76
MIR199A2	MicroRNA 199a-2	RNA Gene	19	GC01M172235	1.76
EPM2A	EPM2A Glucan Phosphatase, Laforin	Protein Coding	41	GC06M145382	1.76
NRAS	NRAS Proto-Oncogene, GTPase	Protein Coding	47	GC01M114704	1.76
CCAR2	Cell Cycle And Apoptosis Regulator 2	Protein Coding	36	GC08P022604	1.76
UTRN	Utrophin	Protein Coding	39	GC06P144285	1.75
TEX264	Testis Expressed 264, ER-Phagy Receptor	Protein Coding	35	GC03P051663	1.75
CDK1	Cyclin Dependent Kinase 1	Protein Coding	44	GC10P060772	1.75
BMI1	BMI1 Proto-Oncogene, Polycomb Ring Finger	Protein Coding	42	GC10P022326	1.75
SIRT3	Sirtuin 3	Protein Coding	45	GC11M000215	1.75
EIF2AK2	Eukaryotic Translation Initiation Factor 2 Alpha Kinase 2	Protein Coding	45	GC02M037099	1.75
ABCB1	ATP Binding Cassette Subfamily B Member 1	Protein Coding	50	GC07M087504	1.75
HLA-DQA1	Major Histocompatibility Complex, Class II, DQ Alpha 1	Protein Coding	41	GC06P064167	1.74
MAVS	Mitochondrial Antiviral Signaling Protein	Protein Coding	38	GC20P003850	1.74
CTSA	Cathepsin A	Protein Coding	43	GC20P045890	1.74
ANXA7	Annexin A7	Protein Coding	40	GC10M073375	1.74
EZH2	Enhancer Of Zeste 2 Polycomb Repressive Complex 2 Subunit	Protein Coding	52	GC07M148807	1.74
BCL2L10	BCL2 Like 10	Protein Coding	36	GC15M072445	1.73
SERPINA1	Serpin Family A Member 1	Protein Coding	47	GC14M094376	1.73
KDM4B	Lysine Demethylase 4B	Protein Coding	44	GC19P004969	1.73
TBC1D25	TBC1 Domain Family Member 25	Protein Coding	34	GC0XP048539	1.73
LAMP3	Lysosomal Associated Membrane Protein 3	Protein Coding	37	GC03M183122	1.73
NPM1	Nucleophosmin 1	Protein Coding	48	GC05P171387	1.73
GOPC	Golgi Associated PDZ And Coiled-Coil Motif Containing	Protein Coding	40	GC06M117560	1.72
PI4KB	Phosphatidylinositol 4-Kinase Beta	Protein Coding	43	GC01M151291	1.72
HLA-DRB5	Major Histocompatibility Complex, Class II, DR Beta 5	Protein Coding	39	GC06M054222	1.71
HSPA9	Heat Shock Protein Family A (Hsp70) Member 9	Protein Coding	45	GC05M138554	1.71
MIR130A	MicroRNA 130a	RNA Gene	20	GC11P057641	1.71
IL2RA	Interleukin 2 Receptor Subunit Alpha	Protein Coding	48	GC10M006010	1.71
PSMD2	Proteasome 26S Subunit Ubiquitin Receptor, Non-ATPase 2	Protein Coding	42	GC03P184298	1.7
MIR24-1	MicroRNA 24-1	RNA Gene	19	GC09P095086	1.7
ESR1	Estrogen Receptor 1	Protein Coding	50	GC06P151656	1.7
ITGA5	Integrin Subunit Alpha 5	Protein Coding	47	GC12M054598	1.7
PEG3	Paternally Expressed 3	Protein Coding	37	GC19M056810	1.7
GJA1	Gap Junction Protein Alpha 1	Protein Coding	49	GC06P121436	1.7
LINC-ROR	Long Intergenic Non-Protein Coding RNA, Regulator Of Reprogramming	RNA Gene	17	GC18M057054	1.69
HIPK2	Homeodomain Interacting Protein Kinase 2	Protein Coding	43	GC07M139561	1.69
PPARG	Peroxisome Proliferator Activated Receptor Gamma	Protein Coding	50	GC03P012287	1.69
RICTOR	RPTOR Independent Companion Of MTOR Complex 2	Protein Coding	43	GC05M038937	1.69
GAS5	Growth Arrest Specific 5	RNA Gene	23	GC01M173947	1.69
PSMA6	Proteasome 20S Subunit Alpha 6	Protein Coding	44	GC14P035278	1.69
RGS19	Regulator Of G Protein Signaling 19	Protein Coding	39	GC20M064073	1.68
UBE2N	Ubiquitin Conjugating Enzyme E2 N	Protein Coding	44	GC12M093406	1.68
HLA-DQB1	Major Histocompatibility Complex, Class II, DQ Beta 1	Protein Coding	41	GC06M054235	1.68
CASP14	Caspase 14	Protein Coding	44	GC19P015049	1.68
CUL4B	Cullin 4B	Protein Coding	42	GC0XM120524	1.68
PSMC5	Proteasome 26S Subunit, ATPase 5	Protein Coding	41	GC17P063827	1.68
SPHK1	Sphingosine Kinase 1	Protein Coding	45	GC17P076376	1.67
VPS11	VPS11 Core Subunit Of CORVET And HOPS Complexes	Protein Coding	40	GC11P119067	1.67
AP2M1	Adaptor Related Protein Complex 2 Subunit Mu 1	Protein Coding	43	GC03P184174	1.67
HNRNPA2B1	Heterogeneous Nuclear Ribonucleoprotein A2/B1	Protein Coding	45	GC07M026174	1.67
BIRC3	Baculoviral IAP Repeat Containing 3	Protein Coding	45	GC11P102317	1.67
MALT1	MALT1 Paracaspase	Protein Coding	45	GC18P058671	1.67
NEAT1	Nuclear Paraspeckle Assembly Transcript 1	RNA Gene	23	GC11P067477	1.67
XPO1	Exportin 1	Protein Coding	45	GC02M061445	1.66
MIR210	MicroRNA 210	RNA Gene	21	GC11M001785	1.66
FN1	Fibronectin 1	Protein Coding	48	GC02M215360	1.66
GRN	Granulin Precursor	Protein Coding	45	GC17P044345	1.66
EI24P2	EI24 Pseudogene 2	Pseudogene	5	GC01P158428	1.66
EI24P1	EI24 Pseudogene 1	Pseudogene	4	GC03M176068	1.66
EI24P3	EI24 Pseudogene 3	Pseudogene	4	GC03M044524	1.66
EI24P4	EI24 Pseudogene 4	Pseudogene	4	GC07P146729	1.66
EI24P5	EI24 Pseudogene 5	Pseudogene	2	GC08P053194	1.66
TAB3	TGF-Beta Activated Kinase 1 (MAP3K7) Binding Protein 3	Protein Coding	39	GC0XM030847	1.66
SUMO1	Small Ubiquitin Like Modifier 1	Protein Coding	44	GC02M202206	1.66
COL1A1	Collagen Type I Alpha 1 Chain	Protein Coding	48	GC17M050183	1.66
DIABLO	Diablo IAP-Binding Mitochondrial Protein	Protein Coding	45	GC12M122208	1.66
CCR5	C-C Motif Chemokine Receptor 5	Protein Coding	44	GC03P046383	1.66
FIS1	Fission, Mitochondrial 1	Protein Coding	36	GC07M101239	1.66
ATXN7	Ataxin 7	Protein Coding	39	GC03P063864	1.65
HLA-DPB1	Major Histocompatibility Complex, Class II, DP Beta 1	Protein Coding	42	GC06P064174	1.65
PLEKHG5	Pleckstrin Homology And RhoGEF Domain Containing G5	Protein Coding	39	GC01M006466	1.65
HLA-DPA1	Major Histocompatibility Complex, Class II, DP Alpha 1	Protein Coding	39	GC06M033064	1.65
HLA-DQB2	Major Histocompatibility Complex, Class II, DQ Beta 2	Protein Coding	37	GC06M032756	1.65
HLA-DQA2	Major Histocompatibility Complex, Class II, DQ Alpha 2	Protein Coding	36	GC06P032741	1.65
ITGA3	Integrin Subunit Alpha 3	Protein Coding	45	GC17P050055	1.65
TMPO	Thymopoietin	Protein Coding	44	GC12P098515	1.65
SREBF1	Sterol Regulatory Element Binding Transcription Factor 1	Protein Coding	44	GC17M017810	1.65
SPG11	SPG11 Vesicle Trafficking Associated, Spatacsin	Protein Coding	38	GC15M044562	1.65
NTRK1	Neurotrophic Receptor Tyrosine Kinase 1	Protein Coding	47	GC01P156815	1.65
PLD1	Phospholipase D1	Protein Coding	47	GC03M171600	1.65
CASP2	Caspase 2	Protein Coding	47	GC07P146714	1.64
TP73	Tumor Protein P73	Protein Coding	44	GC01P003652	1.64
DNAJB1	DnaJ Heat Shock Protein Family (Hsp40) Member B1	Protein Coding	41	GC19M014514	1.64
ACTB	Actin Beta	Protein Coding	47	GC07M005527	1.64
FOXM1	Forkhead Box M1	Protein Coding	43	GC12M002857	1.64
CHMP4B	Charged Multivesicular Body Protein 4B	Protein Coding	41	GC20P033915	1.64
MIR9-1	MicroRNA 9-1	RNA Gene	20	GC01M156420	1.63
MIR144	MicroRNA 144	RNA Gene	18	GC17M032332	1.63
MIR143	MicroRNA 143	RNA Gene	22	GC05P149410	1.63
MIR93	MicroRNA 93	RNA Gene	21	GC07M100883	1.63
RMDN3	Regulator Of Microtubule Dynamics 3	Protein Coding	32	GC15M040735	1.63
PHB	Prohibitin	Protein Coding	45	GC17M049404	1.63
NCOA4	Nuclear Receptor Coactivator 4	Protein Coding	38	GC10M046005	1.63
HSP90AB1	Heat Shock Protein 90 Alpha Family Class B Member 1	Protein Coding	44	GC06P044246	1.63
LMNB2	Lamin B2	Protein Coding	42	GC19M003109	1.63
NDRG2	NDRG Family Member 2	Protein Coding	37	GC14M021016	1.63
WDFY4	WDFY Family Member 4	Protein Coding	35	GC10P048684	1.63
ITGB2	Integrin Subunit Beta 2	Protein Coding	48	GC21M044885	1.63
TRIB3	Tribbles Pseudokinase 3	Protein Coding	41	GC20P000361	1.62
SGPL1	Sphingosine-1-Phosphate Lyase 1	Protein Coding	43	GC10P070815	1.62
SIDT2	SID1 Transmembrane Family Member 2	Protein Coding	34	GC11P117178	1.62
MIR181A1	MicroRNA 181a-1	RNA Gene	18	GC01M198860	1.62
SOD2	Superoxide Dismutase 2	Protein Coding	48	GC06M159669	1.62
CCND1	Cyclin D1	Protein Coding	50	GC11P069641	1.62
MIR23B	MicroRNA 23b	RNA Gene	20	GC09P095085	1.62
CDC37	Cell Division Cycle 37, HSP90 Cochaperone	Protein Coding	39	GC19M010391	1.62
BCL10	BCL10 Immune Signaling Adaptor	Protein Coding	43	GC01M085265	1.62
PTRH2	Peptidyl-TRNA Hydrolase 2	Protein Coding	43	GC17M059674	1.62
ENDOG	Endonuclease G	Protein Coding	41	GC09P128818	1.62
TRAF4	TNF Receptor Associated Factor 4	Protein Coding	41	GC17P033032	1.62
CCT3	Chaperonin Containing TCP1 Subunit 3	Protein Coding	40	GC01M156308	1.62
CYC1	Cytochrome C1	Protein Coding	44	GC08P144095	1.61
PSMD4	Proteasome 26S Subunit Ubiquitin Receptor, Non-ATPase 4	Protein Coding	42	GC01P151256	1.61
RAB5C	RAB5C, Member RAS Oncogene Family	Protein Coding	39	GC17M042124	1.61
CD84	CD84 Molecule	Protein Coding	40	GC01M160541	1.61
PRKAG1	Protein Kinase AMP-Activated Non-Catalytic Subunit Gamma 1	Protein Coding	46	GC12M049002	1.61
TRIM65	Tripartite Motif Containing 65	Protein Coding	33	GC17M075880	1.6
SERPINE1	Serpin Family E Member 1	Protein Coding	48	GC07P101127	1.6
EPHA7	EPH Receptor A7	Protein Coding	47	GC06M093240	1.6
RAB27A	RAB27A, Member RAS Oncogene Family	Protein Coding	47	GC15M055202	1.6
CASP4	Caspase 4	Protein Coding	44	GC11M104942	1.6
DFFA	DNA Fragmentation Factor Subunit Alpha	Protein Coding	43	GC01M010456	1.6
ADAM12	ADAM Metallopeptidase Domain 12	Protein Coding	43	GC10M126012	1.6
IGFBP3	Insulin Like Growth Factor Binding Protein 3	Protein Coding	43	GC07M045912	1.6
RAB25	RAB25, Member RAS Oncogene Family	Protein Coding	39	GC01P156061	1.6
TRPM2	Transient Receptor Potential Cation Channel Subfamily M Member 2	Protein Coding	41	GC21P044350	1.6
DVL2	Dishevelled Segment Polarity Protein 2	Protein Coding	44	GC17M007225	1.6
CTSS	Cathepsin S	Protein Coding	43	GC01M150730	1.6
PDPK1	3-Phosphoinositide Dependent Protein Kinase 1	Protein Coding	47	GC16P002537	1.6
TPCN2	Two Pore Segment Channel 2	Protein Coding	36	GC11P069066	1.59
TRIM6	Tripartite Motif Containing 6	Protein Coding	34	GC11P005596	1.59
PLEKHM1	Pleckstrin Homology And RUN Domain Containing M1	Protein Coding	40	GC17M045435	1.59
IL13	Interleukin 13	Protein Coding	42	GC05P132656	1.59
PROM1	Prominin 1	Protein Coding	43	GC04M015965	1.59
MIR375	MicroRNA 375	RNA Gene	19	GC02M219001	1.58
PTPN11	Protein Tyrosine Phosphatase Non-Receptor Type 11	Protein Coding	51	GC12P112418	1.58
PCNA	Proliferating Cell Nuclear Antigen	Protein Coding	49	GC20M005114	1.58
BIRC7	Baculoviral IAP Repeat Containing 7	Protein Coding	37	GC20P063235	1.58
LDHA	Lactate Dehydrogenase A	Protein Coding	49	GC11P018394	1.58
RAC1	Rac Family Small GTPase 1	Protein Coding	47	GC07P006377	1.58
NGF	Nerve Growth Factor	Protein Coding	48	GC01M115285	1.58
ATP6V1A	ATPase H+ Transporting V1 Subunit A	Protein Coding	43	GC03P113747	1.58
BSG	Basigin (Ok Blood Group)	Protein Coding	42	GC19P000571	1.58
ACIN1	Apoptotic Chromatin Condensation Inducer 1	Protein Coding	37	GC14M023058	1.58
HLA-DRB4	Major Histocompatibility Complex, Class II, DR Beta 4	Protein Coding	28	GC06Mo03851	1.58
SCFD1	Sec1 Family Domain Containing 1	Protein Coding	37	GC14P030622	1.58
EEF1A1	Eukaryotic Translation Elongation Factor 1 Alpha 1	Protein Coding	41	GC06M073515	1.58
IL10RB	Interleukin 10 Receptor Subunit Beta	Protein Coding	42	GC21P033266	1.57
NIPSNAP2	Nipsnap Homolog 2	Protein Coding	29	GC07P056034	1.57
MT3	Metallothionein 3	Protein Coding	38	GC16P056589	1.57
CD82	CD82 Molecule	Protein Coding	41	GC11P044586	1.57
G3BP1	G3BP Stress Granule Assembly Factor 1	Protein Coding	39	GC05P151771	1.57
GZMB	Granzyme B	Protein Coding	44	GC14M024630	1.57
TRIM8	Tripartite Motif Containing 8	Protein Coding	37	GC10P102643	1.57
SKP2	S-Phase Kinase Associated Protein 2	Protein Coding	43	GC05P036151	1.57
MIR23A	MicroRNA 23a	RNA Gene	20	GC19M014242	1.57
IL6ST	Interleukin 6 Cytokine Family Signal Transducer	Protein Coding	45	GC05M055935	1.56
TBKBP1	TBK1 Binding Protein 1	Protein Coding	33	GC17P047694	1.56
VHL	Von Hippel-Lindau Tumor Suppressor	Protein Coding	44	GC03P011430	1.56
NLRP6	NLR Family Pyrin Domain Containing 6	Protein Coding	36	GC11P000269	1.56
PDK1	Pyruvate Dehydrogenase Kinase 1	Protein Coding	44	GC02P172555	1.55
FERMT2	FERM Domain Containing Kindlin 2	Protein Coding	37	GC14M052857	1.55
MIR140	MicroRNA 140	RNA Gene	22	GC16P069934	1.55
SPTLC1	Serine Palmitoyltransferase Long Chain Base Subunit 1	Protein Coding	45	GC09M092002	1.54
ALB	Albumin	Protein Coding	47	GC04P073397	1.54
YWHAG	Tyrosine 3-Monooxygenase/Tryptophan 5-Monooxygenase Activation Protein Gamma	Protein Coding	47	GC07M076399	1.54
PRKCD	Protein Kinase C Delta	Protein Coding	52	GC03P053156	1.54
LGALS1	Galectin 1	Protein Coding	41	GC22P037675	1.54
PGK1	Phosphoglycerate Kinase 1	Protein Coding	46	GC0XP077957	1.54
IKBKG	Inhibitor Of Nuclear Factor Kappa B Kinase Regulatory Subunit Gamma	Protein Coding	46	GC0XP154541	1.54
PIK3CD	Phosphatidylinositol-4,5-Bisphosphate 3-Kinase Catalytic Subunit Delta	Protein Coding	52	GC01P009629	1.54
VIM	Vimentin	Protein Coding	48	GC10P017227	1.54
TRAF3	TNF Receptor Associated Factor 3	Protein Coding	45	GC14P107460	1.54
BCL2A1	BCL2 Related Protein A1	Protein Coding	39	GC15M079961	1.54
MLLT11	MLLT11 Transcription Factor 7 Cofactor	Protein Coding	33	GC01P151057	1.54
HK1	Hexokinase 1	Protein Coding	48	GC10P069269	1.53
HGF	Hepatocyte Growth Factor	Protein Coding	50	GC07M081699	1.52
HSPA1A	Heat Shock Protein Family A (Hsp70) Member 1A	Protein Coding	43	GC06P064154	1.52
EPHA1	EPH Receptor A1	Protein Coding	45	GC07M143390	1.52
COL10A1	Collagen Type X Alpha 1 Chain	Protein Coding	41	GC06M116118	1.52
CD209	CD209 Molecule	Protein Coding	41	GC19M007739	1.52
ADIPOQ	Adiponectin, C1Q And Collagen Domain Containing	Protein Coding	43	GC03P186842	1.52
SLC37A4	Solute Carrier Family 37 Member 4	Protein Coding	42	GC11M119024	1.52
SKP1	S-Phase Kinase Associated Protein 1	Protein Coding	41	GC05M134148	1.52
COPZ1	COPI Coat Complex Subunit Zeta 1	Protein Coding	38	GC12P054301	1.52
EEF2	Eukaryotic Translation Elongation Factor 2	Protein Coding	46	GC19M003976	1.52
PML	PML Nuclear Body Scaffold	Protein Coding	44	GC15P073994	1.52
CDH1	Cadherin 1	Protein Coding	48	GC16P068737	1.51
KDM1A	Lysine Demethylase 1A	Protein Coding	45	GC01P023019	1.51
CGAS	Cyclic GMP-AMP Synthase	Protein Coding	28	GC06M073414	1.51
NR2C2	Nuclear Receptor Subfamily 2 Group C Member 2	Protein Coding	43	GC03P014947	1.51
MIR126	MicroRNA 126	RNA Gene	22	GC09P136670	1.51
SMAD2	SMAD Family Member 2	Protein Coding	45	GC18M047809	1.51
FLNA	Filamin A	Protein Coding	47	GC0XM154348	1.51
CSNK2A1	Casein Kinase 2 Alpha 1	Protein Coding	50	GC20M000472	1.5
HULC	Hepatocellular Carcinoma Up-Regulated Long Non-Coding RNA	RNA Gene	21	GC06P008438	1.5
DDB1	Damage Specific DNA Binding Protein 1	Protein Coding	41	GC11M077264	1.5
SP1	Sp1 Transcription Factor	Protein Coding	43	GC12P053380	1.5
PIKFYVE	Phosphoinositide Kinase, FYVE-Type Zinc Finger Containing	Protein Coding	46	GC02P208266	1.5
PIM1	Pim-1 Proto-Oncogene, Serine/Threonine Kinase	Protein Coding	48	GC06P064297	1.5
FASLG	Fas Ligand	Protein Coding	45	GC01P172628	1.5
RSL1D1	Ribosomal L1 Domain Containing 1	Protein Coding	37	GC16M011833	1.5
RAB30	RAB30, Member RAS Oncogene Family	Protein Coding	36	GC11M082973	1.5
EPAS1	Endothelial PAS Domain Protein 1	Protein Coding	47	GC02P046293	1.5
TMED10	Transmembrane P24 Trafficking Protein 10	Protein Coding	40	GC14M075132	1.5
PPP1R13L	Protein Phosphatase 1 Regulatory Subunit 13 Like	Protein Coding	39	GC19M045379	1.5
NEFM	Neurofilament Medium Chain	Protein Coding	41	GC08P024913	1.5
CD4	CD4 Molecule	Protein Coding	47	GC12P006786	1.5
KDM4A	Lysine Demethylase 4A	Protein Coding	40	GC01P043650	1.5
DDIT4	DNA Damage Inducible Transcript 4	Protein Coding	41	GC10P072273	1.49
SNCAIP	Synuclein Alpha Interacting Protein	Protein Coding	43	GC05P122311	1.49
EHMT2	Euchromatic Histone Lysine Methyltransferase 2	Protein Coding	44	GC06M031879	1.49
PRKCI	Protein Kinase C Iota	Protein Coding	47	GC03P170222	1.49
SVIP	Small VCP Interacting Protein	Protein Coding	31	GC11M022799	1.49
NLRP4	NLR Family Pyrin Domain Containing 4	Protein Coding	35	GC19P055836	1.49
MIR376A1	MicroRNA 376a-1	RNA Gene	16	GC14P107727	1.49
H19	H19 Imprinted Maternally Expressed Transcript	RNA Gene	28	GC11M001995	1.49
CFTR	CF Transmembrane Conductance Regulator	Protein Coding	49	GC07P117287	1.49
RAB32	RAB32, Member RAS Oncogene Family	Protein Coding	37	GC06P146543	1.48
ENSG00000284820	Novel Protein	Protein Coding	4	GC02M219212	1.48
MIR30B	MicroRNA 30b	RNA Gene	20	GC08M134800	1.48
NR1H4	Nuclear Receptor Subfamily 1 Group H Member 4	Protein Coding	47	GC12P100473	1.48
PSMD3	Proteasome 26S Subunit, Non-ATPase 3	Protein Coding	41	GC17P039980	1.48
PSMC1	Proteasome 26S Subunit, ATPase 1	Protein Coding	40	GC14P090256	1.48
NQO1	NAD(P)H Quinone Dehydrogenase 1	Protein Coding	47	GC16M069706	1.48
THBS1	Thrombospondin 1	Protein Coding	43	GC15P039581	1.48
ITGA1	Integrin Subunit Alpha 1	Protein Coding	40	GC05P052788	1.48
RAB6A	RAB6A, Member RAS Oncogene Family	Protein Coding	39	GC11M077810	1.48
PIR	Pirin	Protein Coding	37	GC0XM015402	1.48
RAB41	RAB41, Member RAS Oncogene Family	Protein Coding	31	GC0XP070282	1.48
UBE2D2	Ubiquitin Conjugating Enzyme E2 D2	Protein Coding	43	GC05P139526	1.48
JAK1	Janus Kinase 1	Protein Coding	51	GC01M064833	1.48
FLT3	Fms Related Receptor Tyrosine Kinase 3	Protein Coding	51	GC13M028003	1.47
UBA1	Ubiquitin Like Modifier Activating Enzyme 1	Protein Coding	45	GC0XP047190	1.47
NIPSNAP1	Nipsnap Homolog 1	Protein Coding	37	GC22M029554	1.47
GLI3	GLI Family Zinc Finger 3	Protein Coding	47	GC07M041960	1.47
RRAGA	Ras Related GTP Binding A	Protein Coding	38	GC09P019049	1.47
EPRS1	Glutamyl-Prolyl-TRNA Synthetase 1	Protein Coding	34	GC01M219969	1.47
ALDH2	Aldehyde Dehydrogenase 2 Family Member	Protein Coding	48	GC12P111766	1.47
RASSF5	Ras Association Domain Family Member 5	Protein Coding	39	GC01P206507	1.47
RRAGD	Ras Related GTP Binding D	Protein Coding	36	GC06M089364	1.46
CSNK2A2	Casein Kinase 2 Alpha 2	Protein Coding	45	GC16M058157	1.46
RHEB	Ras Homolog, MTORC1 Binding	Protein Coding	46	GC07M151466	1.46
CRYAB	Crystallin Alpha B	Protein Coding	43	GC11M111908	1.46
MAP2	Microtubule Associated Protein 2	Protein Coding	41	GC02P209424	1.46
WDR26	WD Repeat Domain 26	Protein Coding	39	GC01M224385	1.46
EEA1	Early Endosome Antigen 1	Protein Coding	42	GC12M092770	1.46
SLC25A6	Solute Carrier Family 25 Member 6	Protein Coding	41	GC0XM001386	1.46
LEPR	Leptin Receptor	Protein Coding	47	GC01P065421	1.45
ORMDL3	ORMDL Sphingolipid Biosynthesis Regulator 3	Protein Coding	39	GC17M039921	1.45
RUFY4	RUN And FYVE Domain Containing 4	Protein Coding	29	GC02P218034	1.45
EIF4E	Eukaryotic Translation Initiation Factor 4E	Protein Coding	47	GC04M098879	1.45
EIF4G1	Eukaryotic Translation Initiation Factor 4 Gamma 1	Protein Coding	44	GC03P184314	1.45
CSF1	Colony Stimulating Factor 1	Protein Coding	41	GC01P109911	1.45
DDX5	DEAD-Box Helicase 5	Protein Coding	45	GC17M064498	1.45
SEC23A	SEC23 Homolog A, COPII Coat Complex Component	Protein Coding	43	GC14M039031	1.45
SEC24C	SEC24 Homolog C, COPII Coat Complex Component	Protein Coding	43	GC10P073744	1.45
ITGA2	Integrin Subunit Alpha 2	Protein Coding	44	GC05P052989	1.45
NUP93	Nucleoporin 93	Protein Coding	39	GC16P056855	1.45
MFF	Mitochondrial Fission Factor	Protein Coding	37	GC02P227325	1.44
KL	Klotho	Protein Coding	43	GC13P033016	1.44
CSNK1A1	Casein Kinase 1 Alpha 1	Protein Coding	47	GC05M149492	1.44
ANXA1	Annexin A1	Protein Coding	47	GC09P073151	1.44
NEDD4L	NEDD4 Like E3 Ubiquitin Protein Ligase	Protein Coding	45	GC18P058044	1.44
PFKP	Phosphofructokinase, Platelet	Protein Coding	44	GC10P003066	1.44
STAT1	Signal Transducer And Activator Of Transcription 1	Protein Coding	51	GC02M190908	1.44
XRCC5	X-Ray Repair Cross Complementing 5	Protein Coding	43	GC02P216107	1.44
PDE4A	Phosphodiesterase 4A	Protein Coding	43	GC19P010416	1.43
TUBA1B	Tubulin Alpha 1b	Protein Coding	41	GC12M049127	1.43
SLC1A3	Solute Carrier Family 1 Member 3	Protein Coding	49	GC05P036629	1.43
MIR146A	MicroRNA 146a	RNA Gene	22	GC05P160485	1.43
AIM2	Absent In Melanoma 2	Protein Coding	40	GC01M159062	1.43
UBXN6	UBX Domain Protein 6	Protein Coding	36	GC19M004444	1.43
RAB11B	RAB11B, Member RAS Oncogene Family	Protein Coding	41	GC19P008393	1.42
IL1A	Interleukin 1 Alpha	Protein Coding	41	GC02M112773	1.42
HIPK3	Homeodomain Interacting Protein Kinase 3	Protein Coding	41	GC11P033287	1.42
EMD	Emerin	Protein Coding	43	GC0XP154379	1.42
CREBBP	CREB Binding Protein	Protein Coding	50	GC16M005093	1.42
NFKBIA	NFKB Inhibitor Alpha	Protein Coding	48	GC14M035401	1.42
RALB	RAS Like Proto-Oncogene B	Protein Coding	43	GC02P120240	1.42
RNF216	Ring Finger Protein 216	Protein Coding	41	GC07M005620	1.42
DICER1	Dicer 1, Ribonuclease III	Protein Coding	46	GC14M095086	1.41
TNFAIP8L1	TNF Alpha Induced Protein 8 Like 1	Protein Coding	31	GC19P004639	1.41
PELO	Pelota MRNA Surveillance And Ribosome Rescue Factor	Protein Coding	37	GC05P052787	1.41
BACE1	Beta-Secretase 1	Protein Coding	45	GC11M117285	1.4
SNRNP70	Small Nuclear Ribonucleoprotein U1 Subunit 70	Protein Coding	37	GC19P049085	1.4
LDHB	Lactate Dehydrogenase B	Protein Coding	44	GC12M021635	1.4
HAGLROS	HAGLR Opposite Strand LncRNA	RNA Gene	14	GC02P176209	1.4
PSAP	Prosaposin	Protein Coding	44	GC10M071816	1.4
KRT8	Keratin 8	Protein Coding	45	GC12M052897	1.39
TGFBR2	Transforming Growth Factor Beta Receptor 2	Protein Coding	48	GC03P030623	1.39
IMMT	Inner Membrane Mitochondrial Protein	Protein Coding	39	GC02M086144	1.39
FGF1	Fibroblast Growth Factor 1	Protein Coding	45	GC05M142555	1.39
CXCL1	C-X-C Motif Chemokine Ligand 1	Protein Coding	40	GC04P073869	1.39
C1QBP	Complement C1q Binding Protein	Protein Coding	44	GC17M005432	1.39
RPS6	Ribosomal Protein S6	Protein Coding	42	GC09M019375	1.39
CUL4A	Cullin 4A	Protein Coding	40	GC13P113208	1.39
MYH9	Myosin Heavy Chain 9	Protein Coding	48	GC22M036281	1.39
FBXL3	F-Box And Leucine Rich Repeat Protein 3	Protein Coding	38	GC13M076992	1.39
BST2	Bone Marrow Stromal Cell Antigen 2	Protein Coding	37	GC19M017403	1.38
KAT2B	Lysine Acetyltransferase 2B	Protein Coding	46	GC03P020043	1.38
H2AX	H2A.X Variant Histone	Protein Coding	34	GC11M119107	1.38
FMR1	FMRP Translational Regulator 1	Protein Coding	43	GC0XP147933	1.38
GLG1	Golgi Glycoprotein 1	Protein Coding	36	GC16M074467	1.38
GBF1	Golgi Brefeldin A Resistant Guanine Nucleotide Exchange Factor 1	Protein Coding	42	GC10P102245	1.38
MYO6	Myosin VI	Protein Coding	44	GC06P075749	1.38
SERPINB5	Serpin Family B Member 5	Protein Coding	41	GC18P063476	1.38
PSMC6	Proteasome 26S Subunit, ATPase 6	Protein Coding	39	GC14P052707	1.37
RABGAP1	RAB GTPase Activating Protein 1	Protein Coding	35	GC09P122932	1.37
MIR216A	MicroRNA 216a	RNA Gene	20	GC02M055988	1.37
IFI27	Interferon Alpha Inducible Protein 27	Protein Coding	37	GC14P094104	1.36
HSPD1	Heat Shock Protein Family D (Hsp60) Member 1	Protein Coding	45	GC02M197486	1.36
ATP6AP2	ATPase H+ Transporting Accessory Protein 2	Protein Coding	42	GC0XP040582	1.36
PYCARD	PYD And CARD Domain Containing	Protein Coding	41	GC16M031201	1.36
VTI1B	Vesicle Transport Through Interaction With T-SNAREs 1B	Protein Coding	40	GC14M067647	1.36
JAK2	Janus Kinase 2	Protein Coding	51	GC09P004985	1.36
TBC1D7	TBC1 Domain Family Member 7	Protein Coding	40	GC06M013266	1.36
SERPINF1	Serpin Family F Member 1	Protein Coding	42	GC17P001761	1.36
DDX58	DExD/H-Box Helicase 58	Protein Coding	45	GC09M032455	1.35
FZD5	Frizzled Class Receptor 5	Protein Coding	45	GC02M207762	1.35
PTPN2	Protein Tyrosine Phosphatase Non-Receptor Type 2	Protein Coding	45	GC18M020978	1.35
MIR100	MicroRNA 100	RNA Gene	20	GC11M122152	1.35
RPLP1	Ribosomal Protein Lateral Stalk Subunit P1	Protein Coding	39	GC15P082243	1.35
CTTN	Cortactin	Protein Coding	41	GC11P070398	1.35
HSPB8	Heat Shock Protein Family B (Small) Member 8	Protein Coding	43	GC12P119173	1.35
TERT	Telomerase Reverse Transcriptase	Protein Coding	50	GC05M001253	1.35
PAICS	Phosphoribosylaminoimidazole Carboxylase And Phosphoribosylaminoimidazolesuccinocarboxamide Synthase	Protein Coding	40	GC04P056410	1.35
MPP2	Membrane Palmitoylated Protein 2	Protein Coding	37	GC17M043875	1.35
CHEK2	Checkpoint Kinase 2	Protein Coding	51	GC22M028687	1.34
CASR	Calcium Sensing Receptor	Protein Coding	48	GC03P122183	1.34
NOS2	Nitric Oxide Synthase 2	Protein Coding	48	GC17M027756	1.34
STMN1	Stathmin 1	Protein Coding	41	GC01M025884	1.34
VPS26A	VPS26, Retromer Complex Component A	Protein Coding	37	GC10P069123	1.33
DEGS1	Delta 4-Desaturase, Sphingolipid 1	Protein Coding	39	GC01P224175	1.33
SETD2	SET Domain Containing 2, Histone Lysine Methyltransferase	Protein Coding	45	GC03M047033	1.33
TOMM20	Translocase Of Outer Mitochondrial Membrane 20	Protein Coding	37	GC01M235109	1.33
BRD4	Bromodomain Containing 4	Protein Coding	45	GC19M015236	1.33
HNRNPK	Heterogeneous Nuclear Ribonucleoprotein K	Protein Coding	44	GC09M088550	1.33
AZI2	5-Azacytidine Induced 2	Protein Coding	35	GC03M028315	1.33
PRKAG2	Protein Kinase AMP-Activated Non-Catalytic Subunit Gamma 2	Protein Coding	48	GC07M151556	1.33
APEX1	Apurinic/Apyrimidinic Endodeoxyribonuclease 1	Protein Coding	43	GC14P020455	1.33
EEF1A2	Eukaryotic Translation Elongation Factor 1 Alpha 2	Protein Coding	45	GC20M063488	1.33
TGFBRAP1	Transforming Growth Factor Beta Receptor Associated Protein 1	Protein Coding	32	GC02M105250	1.33
USP7	Ubiquitin Specific Peptidase 7	Protein Coding	47	GC16M008892	1.33
NEK9	NIMA Related Kinase 9	Protein Coding	44	GC14M075079	1.33
KAT2A	Lysine Acetyltransferase 2A	Protein Coding	45	GC17M042113	1.32
HADHA	Hydroxyacyl-CoA Dehydrogenase Trifunctional Multienzyme Complex Subunit Alpha	Protein Coding	44	GC02M026190	1.32
CACYBP	Calcyclin Binding Protein	Protein Coding	37	GC01P174968	1.32
KHDRBS1	KH RNA Binding Domain Containing, Signal Transduction Associated 1	Protein Coding	41	GC01P032013	1.32
CD47	CD47 Molecule	Protein Coding	41	GC03M108043	1.32
ATP1A1	ATPase Na+/K+ Transporting Subunit Alpha 1	Protein Coding	48	GC01P116372	1.32
TRPM7	Transient Receptor Potential Cation Channel Subfamily M Member 7	Protein Coding	44	GC15M050552	1.32
IFT20	Intraflagellar Transport 20	Protein Coding	35	GC17M032321	1.32
VTN	Vitronectin	Protein Coding	41	GC17M032325	1.32
EPHA6	EPH Receptor A6	Protein Coding	40	GC03P096814	1.32
CAPN1	Calpain 1	Protein Coding	47	GC11P067440	1.32
PFKFB3	6-Phosphofructo-2-Kinase/Fructose-2,6-Biphosphatase 3	Protein Coding	43	GC10P006144	1.32
TFE3	Transcription Factor Binding To IGHM Enhancer 3	Protein Coding	42	GC0XM049028	1.32
MIR125B1	MicroRNA 125b-1	RNA Gene	21	GC11M122100	1.31
EIF5A	Eukaryotic Translation Initiation Factor 5A	Protein Coding	42	GC17P007306	1.31
PSMC2	Proteasome 26S Subunit, ATPase 2	Protein Coding	39	GC07P103344	1.31
CALR	Calreticulin	Protein Coding	48	GC19P012938	1.31
USP9X	Ubiquitin Specific Peptidase 9 X-Linked	Protein Coding	46	GC0XP041085	1.31
EXOC8	Exocyst Complex Component 8	Protein Coding	36	GC01M231332	1.31
SLCO1A2	Solute Carrier Organic Anion Transporter Family Member 1A2	Protein Coding	37	GC12M021264	1.31
TUBB	Tubulin Beta Class I	Protein Coding	48	GC06P064115	1.31
SMURF1	SMAD Specific E3 Ubiquitin Protein Ligase 1	Protein Coding	43	GC07M099027	1.31
SOX2	SRY-Box Transcription Factor 2	Protein Coding	45	GC03P181711	1.31
ATP6V0A2	ATPase H+ Transporting V0 Subunit A2	Protein Coding	43	GC12P123712	1.31
RPL18	Ribosomal Protein L18	Protein Coding	43	GC19M048615	1.31
CKAP4	Cytoskeleton Associated Protein 4	Protein Coding	36	GC12M106237	1.31
TBC1D15	TBC1 Domain Family Member 15	Protein Coding	36	GC12P071839	1.31
TGFB2-OT1	TGFB2 Overlapping Transcript 1	RNA Gene	10	GC01P218442	1.31
RAB13	RAB13, Member RAS Oncogene Family	Protein Coding	37	GC01M153981	1.31
HNRNPH1	Heterogeneous Nuclear Ribonucleoprotein H1	Protein Coding	38	GC05M179614	1.31
AKT3	AKT Serine/Threonine Kinase 3	Protein Coding	51	GC01M243488	1.31
IMPA1	Inositol Monophosphatase 1	Protein Coding	46	GC08M081656	1.3
HDAC4	Histone Deacetylase 4	Protein Coding	50	GC02M239048	1.3
CLDN1	Claudin 1	Protein Coding	45	GC03M190305	1.3
CCT8	Chaperonin Containing TCP1 Subunit 8	Protein Coding	38	GC21M029055	1.3
NEFL	Neurofilament Light Chain	Protein Coding	44	GC08M024950	1.3
TICAM1	Toll Like Receptor Adaptor Molecule 1	Protein Coding	43	GC19M004815	1.3
RAB3GAP2	RAB3 GTPase Activating Non-Catalytic Protein Subunit 2	Protein Coding	38	GC01M220149	1.3
KPNA2	Karyopherin Subunit Alpha 2	Protein Coding	43	GC17P068035	1.3
GLS	Glutaminase	Protein Coding	45	GC02P190880	1.29
POLR2A	RNA Polymerase II Subunit A	Protein Coding	43	GC17P009826	1.29
MST1	Macrophage Stimulating 1	Protein Coding	44	GC03M049683	1.29
SACM1L	SAC1 Like Phosphatidylinositide Phosphatase	Protein Coding	37	GC03P045926	1.29
RBM8A	RNA Binding Motif Protein 8A	Protein Coding	39	GC01M145921	1.29
VPS13D	Vacuolar Protein Sorting 13 Homolog D	Protein Coding	33	GC01P012231	1.29
VAMP7	Vesicle Associated Membrane Protein 7	Protein Coding	40	GC0XP155881	1.29
OGT	O-Linked N-Acetylglucosamine (GlcNAc) Transferase	Protein Coding	43	GC0XP071534	1.29
TOMM40	Translocase Of Outer Mitochondrial Membrane 40	Protein Coding	39	GC19P044890	1.29
FKBP8	FKBP Prolyl Isomerase 8	Protein Coding	41	GC19M018503	1.29
NCOA3	Nuclear Receptor Coactivator 3	Protein Coding	44	GC20P047501	1.29
SNAP23	Synaptosome Associated Protein 23	Protein Coding	42	GC15P042491	1.29
MBP	Myelin Basic Protein	Protein Coding	43	GC18M076978	1.29
MID2	Midline 2	Protein Coding	40	GC0XP107825	1.29
SLC2A1	Solute Carrier Family 2 Member 1	Protein Coding	51	GC01M042925	1.29
PSMD10	Proteasome 26S Subunit, Non-ATPase 10	Protein Coding	39	GC0XM108084	1.28
APOL1	Apolipoprotein L1	Protein Coding	42	GC22P036253	1.28
ZFAND1	Zinc Finger AN1-Type Containing 1	Protein Coding	31	GC08M081701	1.28
MAGEA6	MAGE Family Member A6	Protein Coding	33	GC0XM152766	1.28
PCM1	Pericentriolar Material 1	Protein Coding	41	GC08P017922	1.28
TP63	Tumor Protein P63	Protein Coding	47	GC03P189598	1.28
FGFR2	Fibroblast Growth Factor Receptor 2	Protein Coding	51	GC10M121478	1.28
KRT18	Keratin 18	Protein Coding	46	GC12P052948	1.28
ZFYVE26	Zinc Finger FYVE-Type Containing 26	Protein Coding	38	GC14M067727	1.28
PCLAF	PCNA Clamp Associated Factor	Protein Coding	28	GC15M072183	1.28
SLC33A1	Solute Carrier Family 33 Member 1	Protein Coding	42	GC03M155821	1.27
ATP6V1G1	ATPase H+ Transporting V1 Subunit G1	Protein Coding	37	GC09P117417	1.27
CANX	Calnexin	Protein Coding	42	GC05P179678	1.27
CCT7	Chaperonin Containing TCP1 Subunit 7	Protein Coding	40	GC02P073233	1.27
UBTF	Upstream Binding Transcription Factor	Protein Coding	42	GC17M044205	1.27
IPO5	Importin 5	Protein Coding	39	GC13P097953	1.27
MIR18A	MicroRNA 18a	RNA Gene	18	GC13P091498	1.27
MECOM	MDS1 And EVI1 Complex Locus	Protein Coding	45	GC03M169083	1.27
MDH1	Malate Dehydrogenase 1	Protein Coding	44	GC02P063557	1.27
DEFB103B	Defensin Beta 103B	Protein Coding	28	GC08M007430	1.27
RALBP1	RalA Binding Protein 1	Protein Coding	43	GC18P009465	1.27
CIP2A	Cellular Inhibitor Of PP2A	Protein Coding	27	GC03M108545	1.27
CUL2	Cullin 2	Protein Coding	41	GC10M035046	1.27
IGF2R	Insulin Like Growth Factor 2 Receptor	Protein Coding	44	GC06P159969	1.26
DNAJA1	DnaJ Heat Shock Protein Family (Hsp40) Member A1	Protein Coding	40	GC09P033025	1.26
SAFB	Scaffold Attachment Factor B	Protein Coding	38	GC19P005623	1.26
BRCA1	BRCA1 DNA Repair Associated	Protein Coding	48	GC17M043044	1.26
MYD88	MYD88 Innate Immune Signal Transduction Adaptor	Protein Coding	47	GC03P038139	1.26
ATP5F1A	ATP Synthase F1 Subunit Alpha	Protein Coding	36	GC18M046081	1.26
PSMC3	Proteasome 26S Subunit, ATPase 3	Protein Coding	41	GC11M076982	1.26
MIR29C	MicroRNA 29c	RNA Gene	18	GC01M207802	1.26
BCR	BCR Activator Of RhoGEF And GTPase	Protein Coding	50	GC22P023179	1.26
EDEM1	ER Degradation Enhancing Alpha-Mannosidase Like Protein 1	Protein Coding	40	GC03P005187	1.26
IRF5	Interferon Regulatory Factor 5	Protein Coding	45	GC07P128937	1.25
HDAC9	Histone Deacetylase 9	Protein Coding	45	GC07P018086	1.25
PKD2	Polycystin 2, Transient Receptor Potential Cation Channel	Protein Coding	45	GC04P088007	1.25
PIK3R3	Phosphoinositide-3-Kinase Regulatory Subunit 3	Protein Coding	42	GC01M046041	1.25
PIP5K1C	Phosphatidylinositol-4-Phosphate 5-Kinase Type 1 Gamma	Protein Coding	47	GC19M003631	1.25
P4HB	Prolyl 4-Hydroxylase Subunit Beta	Protein Coding	47	GC17M081843	1.25
MIR29B1	MicroRNA 29b-1	RNA Gene	20	GC07M130877	1.24
UBE2D1	Ubiquitin Conjugating Enzyme E2 D1	Protein Coding	43	GC10P058334	1.24
TPT1	Tumor Protein, Translationally-Controlled 1	Protein Coding	44	GC13M045333	1.24
MIR205	MicroRNA 205	RNA Gene	20	GC01P209432	1.24
AHR	Aryl Hydrocarbon Receptor	Protein Coding	47	GC07P016916	1.24
KAT8	Lysine Acetyltransferase 8	Protein Coding	41	GC16P037007	1.24
ING2	Inhibitor Of Growth Family Member 2	Protein Coding	35	GC04P183504	1.24
HNRNPU	Heterogeneous Nuclear Ribonucleoprotein U	Protein Coding	41	GC01M244844	1.24
RAB3GAP1	RAB3 GTPase Activating Protein Catalytic Subunit 1	Protein Coding	40	GC02P135052	1.24
CAPN2	Calpain 2	Protein Coding	45	GC01P223701	1.24
ABHD5	Abhydrolase Domain Containing 5, Lysophosphatidic Acid Acyltransferase	Protein Coding	43	GC03P043707	1.24
MAP4	Microtubule Associated Protein 4	Protein Coding	40	GC03M047850	1.24
GEMIN4	Gem Nuclear Organelle Associated Protein 4	Protein Coding	37	GC17M000744	1.23
PSMB5	Proteasome 20S Subunit Beta 5	Protein Coding	42	GC14M023016	1.23
MIR183	MicroRNA 183	RNA Gene	17	GC07M129808	1.23
SYK	Spleen Associated Tyrosine Kinase	Protein Coding	48	GC09P091608	1.23
RABGAP1L	RAB GTPase Activating Protein 1 Like	Protein Coding	34	GC01P174128	1.23
TMEM192	Transmembrane Protein 192	Protein Coding	32	GC04M165070	1.23
MIR7-1	MicroRNA 7-1	RNA Gene	18	GC09M088551	1.23
PAK1	P21 (RAC1) Activated Kinase 1	Protein Coding	47	GC11M078417	1.23
RAP1A	RAP1A, Member Of RAS Oncogene Family	Protein Coding	44	GC01P111542	1.23
MMP13	Matrix Metallopeptidase 13	Protein Coding	48	GC11M102942	1.23
CDH17	Cadherin 17	Protein Coding	39	GC08M094127	1.23
MON1A	MON1 Homolog A, Secretory Trafficking Associated	Protein Coding	35	GC03M050489	1.23
NCL	Nucleolin	Protein Coding	40	GC02M231453	1.23
ULK4	Unc-51 Like Kinase 4	Protein Coding	40	GC03M041247	1.23
PTBP1	Polypyrimidine Tract Binding Protein 1	Protein Coding	41	GC19P000797	1.23
STX7	Syntaxin 7	Protein Coding	39	GC06M132445	1.23
CTSK	Cathepsin K	Protein Coding	47	GC01M150930	1.23
FEZ1	Fasciculation And Elongation Protein Zeta 1	Protein Coding	37	GC11M125445	1.23
NGFR	Nerve Growth Factor Receptor	Protein Coding	43	GC17P049495	1.23
EGR1	Early Growth Response 1	Protein Coding	41	GC05P138465	1.23
AGO2	Argonaute RISC Catalytic Component 2	Protein Coding	40	GC08M140522	1.23
HSPB6	Heat Shock Protein Family B (Small) Member 6	Protein Coding	37	GC19M053479	1.23
KDR	Kinase Insert Domain Receptor	Protein Coding	51	GC04M055078	1.22
AURKB	Aurora Kinase B	Protein Coding	48	GC17M009591	1.22
ATN1	Atrophin 1	Protein Coding	43	GC12P015379	1.22
BAG1	BAG Cochaperone 1	Protein Coding	40	GC09M033245	1.22
CCT2	Chaperonin Containing TCP1 Subunit 2	Protein Coding	40	GC12P069585	1.22
RAB17	RAB17, Member RAS Oncogene Family	Protein Coding	37	GC02M237574	1.22
HERC1	HECT And RLD Domain Containing E3 Ubiquitin Protein Ligase Family Member 1	Protein Coding	40	GC15M063608	1.22
DNMT1	DNA Methyltransferase 1	Protein Coding	49	GC19M010133	1.22
RUVBL1	RuvB Like AAA ATPase 1	Protein Coding	41	GC03M128064	1.22
CLINT1	Clathrin Interactor 1	Protein Coding	37	GC05M157785	1.22
FBXW5	F-Box And WD Repeat Domain Containing 5	Protein Coding	37	GC09M136989	1.22
TJP2	Tight Junction Protein 2	Protein Coding	44	GC09P069121	1.22
COPE	COPI Coat Complex Subunit Epsilon	Protein Coding	38	GC19M018899	1.22
CCNA2	Cyclin A2	Protein Coding	43	GC04M121816	1.22
PTPA	Protein Phosphatase 2 Phosphatase Activator	Protein Coding	33	GC09P129111	1.22
MIRLET7G	MicroRNA Let-7g	RNA Gene	19	GC03M052268	1.22
HNRNPA3	Heterogeneous Nuclear Ribonucleoprotein A3	Protein Coding	37	GC02P177212	1.21
DDX1	DEAD-Box Helicase 1	Protein Coding	42	GC02P015591	1.21
PSMD11	Proteasome 26S Subunit, Non-ATPase 11	Protein Coding	40	GC17P032444	1.21
GSN	Gelsolin	Protein Coding	47	GC09P121201	1.2
ARHGAP27P1	Rho GTPase Activating Protein 27 Pseudogene 1	Pseudogene	8	GC17M064847	1.2
SEC23B	SEC23 Homolog B, COPII Coat Complex Component	Protein Coding	42	GC20P018507	1.2
SEC24B	SEC24 Homolog B, COPII Coat Complex Component	Protein Coding	39	GC04P109433	1.2
SYT1	Synaptotagmin 1	Protein Coding	45	GC12P078863	1.2
DYNC1H1	Dynein Cytoplasmic 1 Heavy Chain 1	Protein Coding	43	GC14P107456	1.2
SLC25A22	Solute Carrier Family 25 Member 22	Protein Coding	39	GC11M001801	1.2
CAPRIN1	Cell Cycle Associated Protein 1	Protein Coding	37	GC11P034051	1.2
PHGDH	Phosphoglycerate Dehydrogenase	Protein Coding	48	GC01P119660	1.2
EXOC4	Exocyst Complex Component 4	Protein Coding	39	GC07P133253	1.2
HSPA1B	Heat Shock Protein Family A (Hsp70) Member 1B	Protein Coding	37	GC06P064153	1.2
RAB3D	RAB3D, Member RAS Oncogene Family	Protein Coding	38	GC19M011322	1.2
PSMA1	Proteasome 20S Subunit Alpha 1	Protein Coding	42	GC11M014505	1.2
VDAC2	Voltage Dependent Anion Channel 2	Protein Coding	41	GC10P075210	1.2
HNRNPM	Heterogeneous Nuclear Ribonucleoprotein M	Protein Coding	38	GC19P008444	1.2
RARA	Retinoic Acid Receptor Alpha	Protein Coding	48	GC17P040309	1.2
TBC1D2B	TBC1 Domain Family Member 2B	Protein Coding	34	GC15M077984	1.2
CAMK2G	Calcium/Calmodulin Dependent Protein Kinase II Gamma	Protein Coding	46	GC10M073812	1.19
H3C1	H3 Clustered Histone 1	Protein Coding	31	GC06P063914	1.19
LSM4	LSM4 Homolog, U6 Small Nuclear RNA And MRNA Degradation Associated	Protein Coding	37	GC19M018306	1.19
IL7R	Interleukin 7 Receptor	Protein Coding	44	GC05P035852	1.19
RPN2	Ribophorin II	Protein Coding	40	GC20P037178	1.19
BAG2	BAG Cochaperone 2	Protein Coding	38	GC06P057172	1.19
GCN1	GCN1 Activator Of EIF2AK4	Protein Coding	27	GC12M120128	1.19
MIR372	MicroRNA 372	RNA Gene	16	GC19P059919	1.19
PRKD1	Protein Kinase D1	Protein Coding	48	GC14M029576	1.19
ABL2	ABL Proto-Oncogene 2, Non-Receptor Tyrosine Kinase	Protein Coding	44	GC01M179120	1.19
CNOT4	CCR4-NOT Transcription Complex Subunit 4	Protein Coding	39	GC07M135361	1.19
CYLD	CYLD Lysine 63 Deubiquitinase	Protein Coding	47	GC16P050742	1.18
GYS1	Glycogen Synthase 1	Protein Coding	48	GC19M054084	1.18
ADAM17	ADAM Metallopeptidase Domain 17	Protein Coding	49	GC02M009488	1.18
GFM1	G Elongation Factor Mitochondrial 1	Protein Coding	43	GC03P158644	1.18
CARD9	Caspase Recruitment Domain Family Member 9	Protein Coding	42	GC09M136361	1.18
IL37	Interleukin 37	Protein Coding	35	GC02P118658	1.18
MIR338	MicroRNA 338	RNA Gene	17	GC17M081126	1.18
PIN1	Peptidylprolyl Cis/Trans Isomerase, NIMA-Interacting 1	Protein Coding	45	GC19P009835	1.18
CCPG1	Cell Cycle Progression 1	Protein Coding	34	GC15M055340	1.18
XRCC6	X-Ray Repair Cross Complementing 6	Protein Coding	44	GC22P041622	1.18
YBX1	Y-Box Binding Protein 1	Protein Coding	37	GC01P042682	1.18
TSPO	Translocator Protein	Protein Coding	41	GC22P043151	1.18
ADH5	Alcohol Dehydrogenase 5 (Class III), Chi Polypeptide	Protein Coding	45	GC04M099070	1.18
CST3	Cystatin C	Protein Coding	42	GC20M023627	1.18
CERKL	Ceramide Kinase Like	Protein Coding	38	GC02M181536	1.18
ITGA6	Integrin Subunit Alpha 6	Protein Coding	47	GC02P172427	1.18
FAF1	Fas Associated Factor 1	Protein Coding	41	GC01M050439	1.18
MGMT	O-6-Methylguanine-DNA Methyltransferase	Protein Coding	48	GC10P129467	1.18
SGK1	Serum/Glucocorticoid Regulated Kinase 1	Protein Coding	47	GC06M134169	1.18
KDELR1	KDEL Endoplasmic Reticulum Protein Retention Receptor 1	Protein Coding	38	GC19M048382	1.18
GLUD1	Glutamate Dehydrogenase 1	Protein Coding	48	GC10M087050	1.17
PGR	Progesterone Receptor	Protein Coding	48	GC11M101030	1.17
PLA2G4A	Phospholipase A2 Group IVA	Protein Coding	47	GC01P186798	1.17
PEBP1	Phosphatidylethanolamine Binding Protein 1	Protein Coding	43	GC12P118135	1.17
MIR506	MicroRNA 506	RNA Gene	15	GC0XM147230	1.17
ITGAM	Integrin Subunit Alpha M	Protein Coding	45	GC16P037014	1.17
GSDMD	Gasdermin D	Protein Coding	38	GC08P143553	1.17
DRD3	Dopamine Receptor D3	Protein Coding	43	GC03M114128	1.17
UCP2	Uncoupling Protein 2	Protein Coding	44	GC11M073974	1.17
AGK	Acylglycerol Kinase	Protein Coding	40	GC07P141551	1.17
PI4K2A	Phosphatidylinositol 4-Kinase Type 2 Alpha	Protein Coding	39	GC10P097640	1.17
FTH1	Ferritin Heavy Chain 1	Protein Coding	48	GC11M061959	1.17
ADPRH	ADP-Ribosylarginine Hydrolase	Protein Coding	35	GC03P119579	1.17
COPA	COPI Coat Complex Subunit Alpha	Protein Coding	41	GC01M160288	1.17
DYNLL1	Dynein Light Chain LC8-Type 1	Protein Coding	40	GC12P120469	1.17
HSD17B12	Hydroxysteroid 17-Beta Dehydrogenase 12	Protein Coding	39	GC11P043689	1.17
SDCBP	Syndecan Binding Protein	Protein Coding	39	GC08P058539	1.17
CREB1	CAMP Responsive Element Binding Protein 1	Protein Coding	47	GC02P207529	1.17
RAD51	RAD51 Recombinase	Protein Coding	51	GC15P040694	1.16
FKBP4	FKBP Prolyl Isomerase 4	Protein Coding	42	GC12P002795	1.16
MIR185	MicroRNA 185	RNA Gene	21	GC22P029067	1.16
SERPINH1	Serpin Family H Member 1	Protein Coding	44	GC11P075562	1.16
RCN2	Reticulocalbin 2	Protein Coding	39	GC15P076931	1.16
IRS1	Insulin Receptor Substrate 1	Protein Coding	45	GC02M226731	1.16
PRDX2	Peroxiredoxin 2	Protein Coding	45	GC19M012796	1.16
STX12	Syntaxin 12	Protein Coding	37	GC01P027783	1.16
CASP6	Caspase 6	Protein Coding	47	GC04M109688	1.16
PIM3	Pim-3 Proto-Oncogene, Serine/Threonine Kinase	Protein Coding	39	GC22P049960	1.16
XAF1	XIAP Associated Factor 1	Protein Coding	36	GC17P006757	1.16
APOB	Apolipoprotein B	Protein Coding	44	GC02M020956	1.16
LRBA	LPS Responsive Beige-Like Anchor Protein	Protein Coding	40	GC04M150264	1.16
IRF8	Interferon Regulatory Factor 8	Protein Coding	44	GC16P085898	1.16
MIRLET7B	MicroRNA Let-7b	RNA Gene	20	GC22P046119	1.16
CCL2	C-C Motif Chemokine Ligand 2	Protein Coding	47	GC17P034255	1.16
PRMT5	Protein Arginine Methyltransferase 5	Protein Coding	41	GC14M022920	1.16
CCNB1	Cyclin B1	Protein Coding	44	GC05P069167	1.16
ILF3	Interleukin Enhancer Binding Factor 3	Protein Coding	37	GC19P010655	1.16
TBC1D2	TBC1 Domain Family Member 2	Protein Coding	36	GC09M098198	1.16
MIR212	MicroRNA 212	RNA Gene	19	GC17M002050	1.16
DACT1	Dishevelled Binding Antagonist Of Beta Catenin 1	Protein Coding	39	GC14P058633	1.15
MIR27A	MicroRNA 27a	RNA Gene	22	GC19M014241	1.15
NTF4	Neurotrophin 4	Protein Coding	41	GC19M054105	1.15
SUPT5H	SPT5 Homolog, DSIF Elongation Factor Subunit	Protein Coding	38	GC19P039436	1.15
CLCN3	Chloride Voltage-Gated Channel 3	Protein Coding	40	GC04P169612	1.15
ANXA2	Annexin A2	Protein Coding	46	GC15M060347	1.15
MCM7	Minichromosome Maintenance Complex Component 7	Protein Coding	43	GC07M100092	1.15
SLC3A2	Solute Carrier Family 3 Member 2	Protein Coding	40	GC11P062856	1.15
SLK	STE20 Like Kinase	Protein Coding	42	GC10P103967	1.15
HGS	Hepatocyte Growth Factor-Regulated Tyrosine Kinase Substrate	Protein Coding	43	GC17P081683	1.15
USP33	Ubiquitin Specific Peptidase 33	Protein Coding	37	GC01M077695	1.15
TGFB2	Transforming Growth Factor Beta 2	Protein Coding	48	GC01P218345	1.15
RASSF1	Ras Association Domain Family Member 1	Protein Coding	43	GC03M050329	1.15
PEX3	Peroxisomal Biogenesis Factor 3	Protein Coding	41	GC06P143450	1.15
HACD3	3-Hydroxyacyl-CoA Dehydratase 3	Protein Coding	33	GC15P065530	1.15
LITAF	Lipopolysaccharide Induced TNF Factor	Protein Coding	42	GC16M011547	1.15
DMXL2	Dmx Like 2	Protein Coding	35	GC15M051447	1.15
PLAC8	Placenta Associated 8	Protein Coding	35	GC04M083090	1.15
LNCRNA-ATB	Long Noncoding RNA Activated By TGF-Beta	RNA Gene	4	GC14P028501	1.15
SHH	Sonic Hedgehog Signaling Molecule	Protein Coding	47	GC07M155799	1.14
GNAI3	G Protein Subunit Alpha I3	Protein Coding	45	GC01P109548	1.14
MIR96	MicroRNA 96	RNA Gene	20	GC07M129774	1.14
MIR638	MicroRNA 638	RNA Gene	17	GC19P010719	1.14
IL12B	Interleukin 12B	Protein Coding	41	GC05M159314	1.14
NKX2-3	NK2 Homeobox 3	Protein Coding	36	GC10P099532	1.14
FBLN5	Fibulin 5	Protein Coding	44	GC14M091869	1.14
TNFSF15	TNF Superfamily Member 15	Protein Coding	43	GC09M114784	1.14
RAB5B	RAB5B, Member RAS Oncogene Family	Protein Coding	40	GC12P055973	1.14
H2BC3	H2B Clustered Histone 3	Protein Coding	26	GC06M026044	1.14
MAP1A	Microtubule Associated Protein 1A	Protein Coding	37	GC15P043516	1.14
MIR335	MicroRNA 335	RNA Gene	17	GC07P130496	1.14
MIR132	MicroRNA 132	RNA Gene	21	GC17M002049	1.14
KLHL3	Kelch Like Family Member 3	Protein Coding	41	GC05M137617	1.14
PDGFA	Platelet Derived Growth Factor Subunit A	Protein Coding	41	GC07M000497	1.13
PPP1R15A	Protein Phosphatase 1 Regulatory Subunit 15A	Protein Coding	39	GC19P048872	1.13
RAN	RAN, Member RAS Oncogene Family	Protein Coding	43	GC12P130871	1.13
HNRNPDL	Heterogeneous Nuclear Ribonucleoprotein D Like	Protein Coding	39	GC04M082422	1.13
PXN	Paxillin	Protein Coding	44	GC12M120210	1.13
RRAGC	Ras Related GTP Binding C	Protein Coding	40	GC01M038853	1.13
BTRC	Beta-Transducin Repeat Containing E3 Ubiquitin Protein Ligase	Protein Coding	45	GC10P101354	1.13
CSTB	Cystatin B	Protein Coding	45	GC21M043772	1.13
SMC3	Structural Maintenance Of Chromosomes 3	Protein Coding	44	GC10P110567	1.13
RPA2	Replication Protein A2	Protein Coding	43	GC01M027902	1.13
FARSB	Phenylalanyl-TRNA Synthetase Subunit Beta	Protein Coding	41	GC02M222570	1.13
SND1	Staphylococcal Nuclease And Tudor Domain Containing 1	Protein Coding	40	GC07P127652	1.13
SFXN1	Sideroflexin 1	Protein Coding	38	GC05P175477	1.13
SLC25A3	Solute Carrier Family 25 Member 3	Protein Coding	44	GC12P098593	1.13
PSMA3	Proteasome 20S Subunit Alpha 3	Protein Coding	42	GC14P058244	1.13
TXNIP	Thioredoxin Interacting Protein	Protein Coding	36	GC01M145992	1.13
ALCAM	Activated Leukocyte Cell Adhesion Molecule	Protein Coding	41	GC03P105366	1.12
LOC116216141	CRISPRi-Validated Cis-Regulatory Element Chr11.3159	Biological Region	1	GC11P064472	1.12
LOC116216142	CRISPRi-Validated Cis-Regulatory Element Chr11.3233	Biological Region	1	GC11P067866	1.12
LOC116216143	CRISPRi-Validated Cis-Regulatory Element Chr11.3235	Biological Region	1	GC11P067867	1.12
LOC116216144	CRISPRi-Validated Cis-Regulatory Element Chr11.3243	Biological Region	1	GC11P067969	1.12
LOC116216145	CRISPRi-Validated Cis-Regulatory Element Chr11.3247	Biological Region	1	GC11P067971	1.12
LOC116216146	CRISPRi-Validated Cis-Regulatory Element Chr11.3251	Biological Region	1	GC11P067972	1.12
LOC116268446	CRISPRi-Validated Cis-Regulatory Element Chr12.3152	Biological Region	1	GC12P101857	1.12
LOC116268447	CRISPRi-Validated Cis-Regulatory Element Chr12.3153	Biological Region	1	GC12P101858	1.12
GAB1	GRB2 Associated Binding Protein 1	Protein Coding	43	GC04P143336	1.12
SMARCA4	SWI/SNF Related, Matrix Associated, Actin Dependent Regulator Of Chromatin, Subfamily A, Member 4	Protein Coding	47	GC19P010932	1.12
GBE1	1,4-Alpha-Glucan Branching Enzyme 1	Protein Coding	43	GC03M081489	1.12
UCP3	Uncoupling Protein 3	Protein Coding	42	GC11M074000	1.12
DEFB103A	Defensin Beta 103A	Protein Coding	27	GC08P007881	1.12
GLI1	GLI Family Zinc Finger 1	Protein Coding	45	GC12P057460	1.12
ADRM1	ADRM1 26S Proteasome Ubiquitin Receptor	Protein Coding	37	GC20P062302	1.12
SOX2-OT	SOX2 Overlapping Transcript	RNA Gene	22	GC03P180989	1.12
CD274	CD274 Molecule	Protein Coding	42	GC09P005450	1.12
MIR129-1	MicroRNA 129-1	RNA Gene	17	GC07P128207	1.12
XDH	Xanthine Dehydrogenase	Protein Coding	45	GC02M031334	1.12
MTM1	Myotubularin 1	Protein Coding	43	GC0XP150562	1.12
KPNB1	Karyopherin Subunit Beta 1	Protein Coding	41	GC17P047649	1.12
PSMD1	Proteasome 26S Subunit, Non-ATPase 1	Protein Coding	38	GC02P231056	1.12
PLAU	Plasminogen Activator, Urokinase	Protein Coding	49	GC10P073909	1.12
CDC25B	Cell Division Cycle 25B	Protein Coding	44	GC20P003805	1.12
USP8	Ubiquitin Specific Peptidase 8	Protein Coding	47	GC15P050424	1.11
STX6	Syntaxin 6	Protein Coding	38	GC01M180972	1.11
EIF4G3	Eukaryotic Translation Initiation Factor 4 Gamma 3	Protein Coding	40	GC01M020806	1.11
TRIM14	Tripartite Motif Containing 14	Protein Coding	36	GC09M098035	1.11
TPCN1	Two Pore Segment Channel 1	Protein Coding	34	GC12P113221	1.11
SEC24A	SEC24 Homolog A, COPII Coat Complex Component	Protein Coding	37	GC05P134647	1.11
KIF5B	Kinesin Family Member 5B	Protein Coding	43	GC10M032012	1.11
PTGS2	Prostaglandin-Endoperoxide Synthase 2	Protein Coding	47	GC01M186640	1.11
TUBA1A	Tubulin Alpha 1a	Protein Coding	47	GC12M049184	1.11
SLC25A1	Solute Carrier Family 25 Member 1	Protein Coding	46	GC22M019177	1.11
SLC25A13	Solute Carrier Family 25 Member 13	Protein Coding	45	GC07M096120	1.11
TOP2B	DNA Topoisomerase II Beta	Protein Coding	44	GC03M025598	1.11
GFER	Growth Factor, Augmenter Of Liver Regeneration	Protein Coding	43	GC16P001984	1.11
UBE2L3	Ubiquitin Conjugating Enzyme E2 L3	Protein Coding	43	GC22P021549	1.11
PSMD12	Proteasome 26S Subunit, Non-ATPase 12	Protein Coding	41	GC17M067337	1.11
MIR181A2	MicroRNA 181a-2	RNA Gene	20	GC09P124692	1.11
TRIM49	Tripartite Motif Containing 49	Protein Coding	25	GC11M089767	1.11
MIR16-1	MicroRNA 16-1	RNA Gene	21	GC13M050048	1.11
MIR16-2	MicroRNA 16-2	RNA Gene	18	GC03P160413	1.11
ILK	Integrin Linked Kinase	Protein Coding	45	GC11P006604	1.1
FANCC	FA Complementation Group C	Protein Coding	45	GC09M095099	1.1
CCT4	Chaperonin Containing TCP1 Subunit 4	Protein Coding	39	GC02M061868	1.1
ALKBH5	AlkB Homolog 5, RNA Demethylase	Protein Coding	33	GC17P018183	1.1
CDH2	Cadherin 2	Protein Coding	50	GC18M027950	1.1
ERCC6	ERCC Excision Repair 6, Chromatin Remodeling Factor	Protein Coding	44	GC10M049454	1.1
GRID2	Glutamate Ionotropic Receptor Delta Type Subunit 2	Protein Coding	43	GC04P092304	1.1
OCLN	Occludin	Protein Coding	43	GC05P069492	1.1
FOXG1	Forkhead Box G1	Protein Coding	41	GC14P028766	1.1
NOP56	NOP56 Ribonucleoprotein	Protein Coding	41	GC20P003528	1.1
SYNCRIP	Synaptotagmin Binding Cytoplasmic RNA Interacting Protein	Protein Coding	37	GC06M085607	1.1
KIT	KIT Proto-Oncogene, Receptor Tyrosine Kinase	Protein Coding	50	GC04P054657	1.1
TBC1D9	TBC1 Domain Family Member 9	Protein Coding	36	GC04M140621	1.1
DYNLT1	Dynein Light Chain Tctex-Type 1	Protein Coding	36	GC06M158636	1.1
MIR148A	MicroRNA 148a	RNA Gene	19	GC07M025993	1.1
SLC25A4	Solute Carrier Family 25 Member 4	Protein Coding	48	GC04P185143	1.1
HAVCR1	Hepatitis A Virus Cellular Receptor 1	Protein Coding	40	GC05M157028	1.1
TSG101	Tumor Susceptibility 101	Protein Coding	40	GC11M018468	1.1
AP1M1	Adaptor Related Protein Complex 1 Subunit Mu 1	Protein Coding	39	GC19P030270	1.1
ATR	ATR Serine/Threonine Kinase	Protein Coding	51	GC03M142449	1.09
ELOB	Elongin B	Protein Coding	31	GC16M004985	1.09
TCP1	T-Complex 1	Protein Coding	39	GC06M159778	1.09
ACTN1	Actinin Alpha 1	Protein Coding	48	GC14M068874	1.09
PIAS4	Protein Inhibitor Of Activated STAT 4	Protein Coding	41	GC19P004007	1.09
MIR137	MicroRNA 137	RNA Gene	18	GC01M098046	1.09
MIR216B	MicroRNA 216b	RNA Gene	15	GC02M056000	1.09
PRKCE	Protein Kinase C Epsilon	Protein Coding	47	GC02P045651	1.09
CLEC4A	C-Type Lectin Domain Family 4 Member A	Protein Coding	36	GC12P015406	1.09
MIR1-1	MicroRNA 1-1	RNA Gene	20	GC20P063111	1.09
EPHA2	EPH Receptor A2	Protein Coding	50	GC01M016124	1.09
MAP2K3	Mitogen-Activated Protein Kinase Kinase 3	Protein Coding	47	GC17P032860	1.09
FURIN	Furin, Paired Basic Amino Acid Cleaving Enzyme	Protein Coding	44	GC15P090868	1.09
ITGAL	Integrin Subunit Alpha L	Protein Coding	44	GC16P030472	1.09
EPHB3	EPH Receptor B3	Protein Coding	43	GC03P184561	1.09
TNFRSF21	TNF Receptor Superfamily Member 21	Protein Coding	43	GC06M047231	1.09
TNFRSF10A	TNF Receptor Superfamily Member 10a	Protein Coding	43	GC08M023190	1.09
TNFRSF10D	TNF Receptor Superfamily Member 10d	Protein Coding	41	GC08M023135	1.09
IL13RA1	Interleukin 13 Receptor Subunit Alpha 1	Protein Coding	40	GC0XP118727	1.09
HTATIP2	HIV-1 Tat Interactive Protein 2	Protein Coding	39	GC11P020363	1.09
RAB31	RAB31, Member RAS Oncogene Family	Protein Coding	39	GC18P009701	1.09
RAB14	RAB14, Member RAS Oncogene Family	Protein Coding	39	GC09M121178	1.09
CREG1	Cellular Repressor Of E1A Stimulated Genes 1	Protein Coding	36	GC01M167498	1.09
GATA4	GATA Binding Protein 4	Protein Coding	47	GC08P011676	1.08
PLK3	Polo Like Kinase 3	Protein Coding	41	GC01P044799	1.08
CUL5	Cullin 5	Protein Coding	43	GC11P108008	1.08
SLC25A5	Solute Carrier Family 25 Member 5	Protein Coding	43	GC0XP119468	1.08
RIF1	Replication Timing Regulatory Factor 1	Protein Coding	38	GC02P151409	1.08
PTOV1	PTOV1 Extended AT-Hook Containing Adaptor Protein	Protein Coding	36	GC19P049923	1.08
MLF2	Myeloid Leukemia Factor 2	Protein Coding	34	GC12M006772	1.08
SYP	Synaptophysin	Protein Coding	43	GC0XM049187	1.08
MITF	Melanocyte Inducing Transcription Factor	Protein Coding	46	GC03P069788	1.08
NOX4	NADPH Oxidase 4	Protein Coding	40	GC11M089324	1.08
PSMD13	Proteasome 26S Subunit, Non-ATPase 13	Protein Coding	39	GC11P000236	1.08
RUVBL2	RuvB Like AAA ATPase 2	Protein Coding	43	GC19P048993	1.08
TNFRSF1B	TNF Receptor Superfamily Member 1B	Protein Coding	45	GC01P012167	1.08
NR1H2	Nuclear Receptor Subfamily 1 Group H Member 2	Protein Coding	46	GC19P050329	1.07
NUP205	Nucleoporin 205	Protein Coding	36	GC07P135557	1.07
PPP2R1A	Protein Phosphatase 2 Scaffold Subunit Aalpha	Protein Coding	45	GC19P052189	1.07
GDI2	GDP Dissociation Inhibitor 2	Protein Coding	39	GC10M005765	1.07
SSRP1	Structure Specific Recognition Protein 1	Protein Coding	39	GC11M077061	1.07
XPOT	Exportin For TRNA	Protein Coding	39	GC12P064404	1.07
TBC1D7-LOC100130357	TBC1D7-LOC100130357 Readthrough	Protein Coding	8	GC06M013267	1.07
PDIA3	Protein Disulfide Isomerase Family A Member 3	Protein Coding	43	GC15P043746	1.07
CCZ1	CCZ1 Homolog, Vacuolar Protein Trafficking And Biogenesis Associated	Protein Coding	32	GC07P005898	1.07
HMGA2	High Mobility Group AT-Hook 2	Protein Coding	43	GC12P065824	1.07
STK38	Serine/Threonine Kinase 38	Protein Coding	43	GC06M036493	1.07
TJP1	Tight Junction Protein 1	Protein Coding	42	GC15M029699	1.07
MUL1	Mitochondrial E3 Ubiquitin Protein Ligase 1	Protein Coding	37	GC01M020499	1.06
ATP6V0A1	ATPase H+ Transporting V0 Subunit A1	Protein Coding	40	GC17P042458	1.06
VAMP3	Vesicle Associated Membrane Protein 3	Protein Coding	40	GC01P007765	1.06
NR1D1	Nuclear Receptor Subfamily 1 Group D Member 1	Protein Coding	46	GC17M040092	1.06
IFT88	Intraflagellar Transport 88	Protein Coding	40	GC13P020566	1.06
PCLO	Piccolo Presynaptic Cytomatrix Protein	Protein Coding	39	GC07M082754	1.06
ANKRD49	Ankyrin Repeat Domain 49	Protein Coding	35	GC11P094493	1.06
SIDT1	SID1 Transmembrane Family Member 1	Protein Coding	34	GC03P113532	1.06
PJVK	Pejvakin	Protein Coding	27	GC02P178450	1.06
WASH2P	WASP Family Homolog 2, Pseudogene	Pseudogene	21	GC02P113583	1.06
WASH3P	WASP Family Homolog 3, Pseudogene	Pseudogene	19	GC15P101960	1.06
MIR211	MicroRNA 211	RNA Gene	19	GC15M031065	1.06
PRDX1	Peroxiredoxin 1	Protein Coding	47	GC01M045511	1.06
FKBP5	FKBP Prolyl Isomerase 5	Protein Coding	44	GC06M054319	1.06
SLC27A4	Solute Carrier Family 27 Member 4	Protein Coding	44	GC09P128340	1.06
RPL7	Ribosomal Protein L7	Protein Coding	40	GC08M073290	1.06
LGALS9	Galectin 9	Protein Coding	38	GC17P027629	1.06
IFNA1	Interferon Alpha 1	Protein Coding	37	GC09P021551	1.06
TRAPPC12	Trafficking Protein Particle Complex Subunit 12	Protein Coding	36	GC02P003383	1.06
LARS1	Leucyl-TRNA Synthetase 1	Protein Coding	35	GC05M146114	1.06
FGFR1	Fibroblast Growth Factor Receptor 1	Protein Coding	52	GC08M038400	1.06
NOS3	Nitric Oxide Synthase 3	Protein Coding	50	GC07P150990	1.06
PRKCB	Protein Kinase C Beta	Protein Coding	46	GC16P024047	1.06
SNAI1	Snail Family Transcriptional Repressor 1	Protein Coding	42	GC20P049982	1.06
DDA1	DET1 And DDB1 Associated 1	Protein Coding	32	GC19P030289	1.06
PSMA4	Proteasome 20S Subunit Alpha 4	Protein Coding	42	GC15P078540	1.06
CXCL12	C-X-C Motif Chemokine Ligand 12	Protein Coding	43	GC10M044294	1.05
AGT	Angiotensinogen	Protein Coding	47	GC01M230702	1.05
PCK2	Phosphoenolpyruvate Carboxykinase 2, Mitochondrial	Protein Coding	45	GC14P024094	1.05
WNT3A	Wnt Family Member 3A	Protein Coding	45	GC01P228773	1.05
UBE2V1	Ubiquitin Conjugating Enzyme E2 V1	Protein Coding	40	GC20M050082	1.05
STXBP3	Syntaxin Binding Protein 3	Protein Coding	39	GC01P108746	1.05
NOP53	NOP53 Ribosome Biogenesis Factor	Protein Coding	28	GC19P047749	1.05
ARG1	Arginase 1	Protein Coding	47	GC06P131473	1.05
USP15	Ubiquitin Specific Peptidase 15	Protein Coding	45	GC12P062260	1.05
SPI1	Spi-1 Proto-Oncogene	Protein Coding	41	GC11M076981	1.05
LAPTM4B	Lysosomal Protein Transmembrane 4 Beta	Protein Coding	37	GC08P097775	1.05
ST13	ST13 Hsp70 Interacting Protein	Protein Coding	37	GC22M052021	1.05
NRBP2	Nuclear Receptor Binding Protein 2	Protein Coding	34	GC08M143993	1.05
LAMTOR1	Late Endosomal/Lysosomal Adaptor, MAPK And MTOR Activator 1	Protein Coding	33	GC11M072085	1.05
KCNQ1OT1	KCNQ1 Opposite Strand/Antisense Transcript 1	RNA Gene	26	GC11M002661	1.05
MIR107	MicroRNA 107	RNA Gene	18	GC10M089600	1.05
SEC31A	SEC31 Homolog A, COPII Coat Complex Component	Protein Coding	41	GC04M082818	1.05
IGFBP2	Insulin Like Growth Factor Binding Protein 2	Protein Coding	42	GC02P216632	1.05
UBA5	Ubiquitin Like Modifier Activating Enzyme 5	Protein Coding	41	GC03P132654	1.05
GRB2	Growth Factor Receptor Bound Protein 2	Protein Coding	46	GC17M075318	1.05
ENO1	Enolase 1	Protein Coding	45	GC01M008861	1.04
PIP4K2B	Phosphatidylinositol-5-Phosphate 4-Kinase Type 2 Beta	Protein Coding	40	GC17M038765	1.04
TMEM106B	Transmembrane Protein 106B	Protein Coding	37	GC07P012222	1.04
ECHS1	Enoyl-CoA Hydratase, Short Chain 1	Protein Coding	45	GC10M133362	1.04
COL18A1	Collagen Type XVIII Alpha 1 Chain	Protein Coding	43	GC21P045405	1.04
KLF4	Kruppel Like Factor 4	Protein Coding	43	GC09M107484	1.04
PSMA5	Proteasome 20S Subunit Alpha 5	Protein Coding	41	GC01M109399	1.04
DDX17	DEAD-Box Helicase 17	Protein Coding	40	GC22M038483	1.04
FXR2	FMR1 Autosomal Homolog 2	Protein Coding	37	GC17M007592	1.04
NBR2	Neighbor Of BRCA1 LncRNA 2	RNA Gene	24	GC17P043125	1.04
MIR138-1	MicroRNA 138-1	RNA Gene	20	GC03P044115	1.04
ACACA	Acetyl-CoA Carboxylase Alpha	Protein Coding	47	GC17M037084	1.04
LBR	Lamin B Receptor	Protein Coding	46	GC01M225401	1.04
ENPP1	Ectonucleotide Pyrophosphatase/Phosphodiesterase 1	Protein Coding	45	GC06P131808	1.04
SMPD1	Sphingomyelin Phosphodiesterase 1	Protein Coding	45	GC11P006390	1.04
CUL1	Cullin 1	Protein Coding	43	GC07P148697	1.04
GANAB	Glucosidase II Alpha Subunit	Protein Coding	43	GC11M077333	1.04
SLC25A11	Solute Carrier Family 25 Member 11	Protein Coding	43	GC17M004937	1.04
CAND1	Cullin Associated And Neddylation Dissociated 1	Protein Coding	37	GC12P067270	1.04
VAPA	VAMP Associated Protein A	Protein Coding	42	GC18P009904	1.03
RBMX	RNA Binding Motif Protein X-Linked	Protein Coding	41	GC0XM136848	1.03
PSMA2	Proteasome 20S Subunit Alpha 2	Protein Coding	41	GC07M042916	1.03
MTCH2	Mitochondrial Carrier 2	Protein Coding	40	GC11M047604	1.03
PEX13	Peroxisomal Biogenesis Factor 13	Protein Coding	39	GC02P061017	1.03
BLZF1	Basic Leucine Zipper Nuclear Factor 1	Protein Coding	38	GC01P169367	1.03
CCN2	Cellular Communication Network Factor 2	Protein Coding	37	GC06M131948	1.03
DANCR	Differentiation Antagonizing Non-Protein Coding RNA	RNA Gene	21	GC04P052712	1.03
KLHL20	Kelch Like Family Member 20	Protein Coding	37	GC01P173714	1.03
RAC3	Rac Family Small GTPase 3	Protein Coding	44	GC17P082031	1.03
C3	Complement C3	Protein Coding	45	GC19M006677	1.03
DDOST	Dolichyl-Diphosphooligosaccharide--Protein Glycosyltransferase Non-Catalytic Subunit	Protein Coding	43	GC01M020651	1.03
NUP155	Nucleoporin 155	Protein Coding	43	GC05M037288	1.03
PRDX4	Peroxiredoxin 4	Protein Coding	41	GC0XP023665	1.03
KISS1	KiSS-1 Metastasis Suppressor	Protein Coding	40	GC01M204190	1.03
CAB39	Calcium Binding Protein 39	Protein Coding	37	GC02P230712	1.03
IARS1	Isoleucyl-TRNA Synthetase 1	Protein Coding	33	GC09M092211	1.03
DICER1-AS1	DICER1 Antisense RNA 1	RNA Gene	15	GC14P095157	1.03
GPSM1	G Protein Signaling Modulator 1	Protein Coding	36	GC09P136327	1.02
PRKACA	Protein Kinase CAMP-Activated Catalytic Subunit Alpha	Protein Coding	50	GC19M014256	1.02
CALM1	Calmodulin 1	Protein Coding	44	GC14P090396	1.02
MON1B	MON1 Homolog B, Secretory Trafficking Associated	Protein Coding	33	GC16P077190	1.02
ATP5F1B	ATP Synthase F1 Subunit Beta	Protein Coding	33	GC12M056639	1.02
FOXE3	Forkhead Box E3	Protein Coding	36	GC01P047416	1.02
WRN	WRN RecQ Like Helicase	Protein Coding	44	GC08P031033	1.02
TRPC5	Transient Receptor Potential Cation Channel Subfamily C Member 5	Protein Coding	40	GC0XM111774	1.02
CD24	CD24 Molecule	Protein Coding	33	GC06M106969	1.02
BMPR2	Bone Morphogenetic Protein Receptor Type 2	Protein Coding	48	GC02P202376	1.02
GFPT1	Glutamine--Fructose-6-Phosphate Transaminase 1	Protein Coding	44	GC02M069283	1.02
ABCD3	ATP Binding Cassette Subfamily D Member 3	Protein Coding	43	GC01P094418	1.02
GHRL	Ghrelin And Obestatin Prepropeptide	Protein Coding	41	GC03M010285	1.02
TET1	Tet Methylcytosine Dioxygenase 1	Protein Coding	37	GC10P068560	1.02
ZWINT	ZW10 Interacting Kinetochore Protein	Protein Coding	36	GC10M056357	1.02
H1-2	H1.2 Linker Histone, Cluster Member	Protein Coding	32	GC06M026056	1.02
DCAF1	DDB1 And CUL4 Associated Factor 1	Protein Coding	30	GC03M051395	1.02
UCA1	Urothelial Cancer Associated 1	RNA Gene	22	GC19P015828	1.02
MIR29A	MicroRNA 29a	RNA Gene	21	GC07M130876	1.02
MIR186	MicroRNA 186	RNA Gene	18	GC01M071067	1.02
NHLRC1	NHL Repeat Containing E3 Ubiquitin Protein Ligase 1	Protein Coding	39	GC06M018120	1.02
CREB3	CAMP Responsive Element Binding Protein 3	Protein Coding	37	GC09P036997	1.02
ZNNT1	ZNF706 Neighboring Transcript 1	RNA Gene	7	GC08M101167	1.01
DYRK1B	Dual Specificity Tyrosine Phosphorylation Regulated Kinase 1B	Protein Coding	45	GC19M039825	1.01
ITGAV	Integrin Subunit Alpha V	Protein Coding	45	GC02P186589	1.01
RAB27B	RAB27B, Member RAS Oncogene Family	Protein Coding	37	GC18P054717	1.01
SIVA1	SIVA1 Apoptosis Inducing Factor	Protein Coding	35	GC14P107485	1.01
SIK2	Salt Inducible Kinase 2	Protein Coding	42	GC11P111648	1.01
RPL15	Ribosomal Protein L15	Protein Coding	42	GC03P023916	1.01
NPEPPS	Aminopeptidase Puromycin Sensitive	Protein Coding	40	GC17P047522	1.01
TBC1D9B	TBC1 Domain Family Member 9B	Protein Coding	30	GC05M179862	1.01
PRKAR1A	Protein Kinase CAMP-Dependent Type I Regulatory Subunit Alpha	Protein Coding	50	GC17P068744	1.01
SCD	Stearoyl-CoA Desaturase	Protein Coding	47	GC10P100347	1.01
EWSR1	EWS RNA Binding Protein 1	Protein Coding	43	GC22P029816	1.01
TRPC6	Transient Receptor Potential Cation Channel Subfamily C Member 6	Protein Coding	47	GC11M101451	1.01
FGF7	Fibroblast Growth Factor 7	Protein Coding	40	GC15P049423	1.01
MIR15A	MicroRNA 15a	RNA Gene	16	GC13M050049	1.01
PC	Pyruvate Carboxylase	Protein Coding	45	GC11M066848	1.01
MEF2D	Myocyte Enhancer Factor 2D	Protein Coding	43	GC01M156463	1.01
KIF23	Kinesin Family Member 23	Protein Coding	42	GC15P069414	1.01
CLTCL1	Clathrin Heavy Chain Like 1	Protein Coding	39	GC22M019180	1.01
IL23A	Interleukin 23 Subunit Alpha	Protein Coding	37	GC12P056805	1.01
SNX17	Sorting Nexin 17	Protein Coding	36	GC02P027370	1.01
MIR449A	MicroRNA 449a	RNA Gene	20	GC05M055171	1.01
MIR508	MicroRNA 508	RNA Gene	16	GC0XM147236	1.01
VPS13C	Vacuolar Protein Sorting 13 Homolog C	Protein Coding	33	GC15M061852	1.01
PSEN2	Presenilin 2	Protein Coding	48	GC01P226870	1
CDK5RAP3	CDK5 Regulatory Subunit Associated Protein 3	Protein Coding	37	GC17P047967	1
SAFB2	Scaffold Attachment Factor B2	Protein Coding	36	GC19M005587	1
GSTP1	Glutathione S-Transferase Pi 1	Protein Coding	48	GC11P067583	1
SLC16A1	Solute Carrier Family 16 Member 1	Protein Coding	47	GC01M112942	1
CD46	CD46 Molecule	Protein Coding	44	GC01P207752	1
SLC7A11	Solute Carrier Family 7 Member 11	Protein Coding	43	GC04M138164	1
PLSCR1	Phospholipid Scramblase 1	Protein Coding	42	GC03M146515	1
PFKFB4	6-Phosphofructo-2-Kinase/Fructose-2,6-Biphosphatase 4	Protein Coding	40	GC03M048517	1
NAT10	N-Acetyltransferase 10	Protein Coding	38	GC11P034105	1
MIR103A1	MicroRNA 103a-1	RNA Gene	17	GC05M168560	1
SLC22A5	Solute Carrier Family 22 Member 5	Protein Coding	45	GC05P132369	1
M6PR	Mannose-6-Phosphate Receptor, Cation Dependent	Protein Coding	41	GC12M008989	1
TERF2	Telomeric Repeat Binding Factor 2	Protein Coding	39	GC16M069355	1
MTMR6	Myotubularin Related Protein 6	Protein Coding	38	GC13M025246	1
TRAPPC11	Trafficking Protein Particle Complex Subunit 11	Protein Coding	34	GC04P183659	1
CTNND1	Catenin Delta 1	Protein Coding	44	GC11P057979	1
IQGAP1	IQ Motif Containing GTPase Activating Protein 1	Protein Coding	42	GC15P090388	1
ADNP	Activity Dependent Neuroprotector Homeobox	Protein Coding	41	GC20M050888	1
KHSRP	KH-Type Splicing Regulatory Protein	Protein Coding	41	GC19M006413	1
RCAN1	Regulator Of Calcineurin 1	Protein Coding	41	GC21M034513	1
SLC25A10	Solute Carrier Family 25 Member 10	Protein Coding	41	GC17P081712	1
TFCP2	Transcription Factor CP2	Protein Coding	40	GC12M051093	1
IPMK	Inositol Polyphosphate Multikinase	Protein Coding	37	GC10M058191	1
GLTP	Glycolipid Transfer Protein	Protein Coding	35	GC12M109850	1
VPS26B	VPS26, Retromer Complex Component B	Protein Coding	34	GC11P134224	1
MIR124-1	MicroRNA 124-1	RNA Gene	21	GC08M009903	1
MIR153-1	MicroRNA 153-1	RNA Gene	16	GC02M219294	1
PTK2	Protein Tyrosine Kinase 2	Protein Coding	45	GC08M140657	1
SREBF2	Sterol Regulatory Element Binding Transcription Factor 2	Protein Coding	41	GC22P041833	1
