# Supplementary material for: Bioinformatic analysis and experimental validation of hub autophagy-related genes as novel biomarkers for type 2 diabetes mellitus and Alzheimer’s disease
Source: PeerJ. 2025 Oct 6;13:e20143. doi: 10.7717/peerj.20143 (PMC12510248; doi:10.7717/peerj.20143)
Supplement: Supplemental Information 4 [file peerj-13-20143-s004.xls]

## Sheet: Sheet1
ITEM TO CHECK	IMPORTANCE	CHECKLIST
EXPERIMENTAL DESIGN
Definition of experimental and control groups	E	Line 181-198
Number within each group	E	Line 181-198
Assay carried out by core lab or investigator's lab?	D
Acknowledgement of authors' contributions	D	Line 477-483
SAMPLE
Description	E	Line 181-198
Volume/mass of sample processed	D
Microdissection or macrodissection	E	Line 213-225
Processing procedure	E	Line 213-225
If frozen - how and how quickly?	E	Line 213-225
If fixed - with what, how quickly?	E	N/A
Sample storage conditions and duration (especially for FFPE samples)	E	Line 213-225
NUCLEIC ACID EXTRACTION
Procedure and/or instrumentation	E	Line 213-225
Name of kit and details of any modifications	E	Line 213-225
Source of additional reagents used	D	Line 213-225
Details of DNase or RNAse treatment	E	Line 213-225
Contamination assessment (DNA or RNA)	E	Line 213-225
Nucleic acid quantification	E	N/A
Instrument and method	E	N/A
Purity (A260/A280)	D	N/A
Yield	D	N/A
RNA integrity method/instrument	E	N/A
RIN/RQI or Cq of 3' and 5' transcripts	E	N/A
Electrophoresis traces	D	N/A
Inhibition testing (Cq dilutions, spike or other)	E	N/A
REVERSE TRANSCRIPTION
Complete reaction conditions	E	Line 213-225
Amount of RNA and reaction volume	E	Line 213-225
Priming oligonucleotide (if using GSP) and concentration	E	Line 213-225
Reverse transcriptase and concentration	E	Line 213-225
Temperature and time	E	Line 213-225
Manufacturer of reagents and catalogue numbers	D	Line 213-225
Cqs with and without RT	D*	N/A
Storage conditions of cDNA	D	Line 213-225
qPCR TARGET INFORMATION
If multiplex, efficiency and LOD of each assay.	E	N/A
Sequence accession number	E	N/A
Location of amplicon	D	N/A
Amplicon length	E	N/A
In silico specificity screen (BLAST, etc)	E	N/A
Pseudogenes, retropseudogenes or other homologs?	D	N/A
Sequence alignment	D	N/A
Secondary structure analysis of amplicon	D	N/A
Location of each primer by exon or intron (if applicable)	E	N/A
What splice variants are targeted?	E	N/A
qPCR OLIGONUCLEOTIDES
Primer sequences	E	Line 213-225
RTPrimerDB Identification Number	D
Probe sequences	D**
Location and identity of any modifications	E	N/A
Manufacturer of oligonucleotides	D
Purification method	D
qPCR PROTOCOL
Complete reaction conditions	E	Line 213-225
Reaction volume and amount of cDNA/DNA	E	Line 213-225
Primer, (probe), Mg++ and dNTP concentrations	E	Line 213-225
Polymerase identity and concentration	E	Line 213-225
Buffer/kit identity and manufacturer	E	Line 213-225
Exact chemical constitution of the buffer	D	Line 213-225
Additives (SYBR Green I, DMSO, etc.)	E	Line 213-225
Manufacturer of plates/tubes and catalog number	D	Line 213-225
Complete thermocycling parameters	E	Line 213-225
Reaction setup (manual/robotic)	D	Line 213-225
Manufacturer of qPCR instrument	E	Line 213-225
qPCR VALIDATION
Evidence of optimisation (from gradients)	D	N/A
Specificity (gel, sequence, melt, or digest)	E	N/A
For SYBR Green I, Cq of the NTC	E	N/A
Standard curves with slope and y-intercept	E	N/A
PCR efficiency calculated from slope	E	N/A
Confidence interval for PCR efficiency or standard error	D	N/A
r2 of standard curve	E	N/A
Linear dynamic range	E	N/A
Cq variation at lower limit	E	N/A
Confidence intervals throughout range	D	N/A
Evidence for limit of detection	E	N/A
If multiplex, efficiency and LOD of each assay.	E	N/A
DATA ANALYSIS
qPCR analysis program (source, version)	E	Line 227-233
Cq method determination	E	N/A
Outlier identification and disposition	E	N/A
Results of NTCs	E	N/A
Justification of number and choice of reference genes	E	N/A
Description of normalisation method	E	N/A
Number and concordance of biological replicates	D
Number and stage (RT or qPCR) of technical replicates	E	Line 213-225
Repeatability (intra-assay variation)	E	N/A
Reproducibility (inter-assay variation, %CV)	D
Power analysis	D
Statistical methods for result significance	E	Line 227-233
Software (source, version)	E	Line 227-233
Cq or raw data submission using RDML	D
Table 1. MIQE checklist for authors, reviewers and editors. All essential information (E) must be submitted with the manuscript. Desirable
information (D) should be submitted if available. If using primers obtained from RTPrimerDB, information on qPCR target, oligonucleotides,
protocols and validation is available from that source.
*: Assessing the absence of DNA using a no RT assay is essential when first extracting RNA. Once the sample has been validated as
RDNA-free, inclusion of a no-RT control is desirable, but no longer essential.
**: Disclosure of the probe sequence is highly desirable and strongly encouraged. However, since not all commercial pre-designed assay
vendors provide this information, it cannot be an essential requirement. Use of such assays is advised against.
